# Supplementary material for: Signaling levels mold the RAS mutation tropism of urethane
Source: eLife. 2021 May 17;10:e67172. doi: 10.7554/eLife.67172 (PMC8128437; doi:10.7554/eLife.67172)
Supplement: Figure 1—source data 1. [file elife-67172-fig1-data1.xlsx]

## Sheet: Fig 1B
	Native	Het or Homo
	0	18
	126	0
	6	163
	0	847
	24.5	571
	0	0
	0	0
	4.5	0
	68.75	4
	0	125.625
	0	0
	0	117.984
	0	486
	0	4
	27.5625	0
	0	1.352
	0	8.82
	0	126
	0	0.5
	0	0
	52.65	0
	0	0
	0	1112
	0	64.125
	0	0
	0	24.5
	0	0
	6	0
	0	0
	27.38	0
		40
		0
		0.5
		0.5
		0
		100
		346.5
		551.08
		4
		50.625
		0
		0
		0
		1069.5
		0
		7.8125
		0
		0
		1.44
		0
		828.109

## Sheet: Fig 1C
	Native	Het or Homo
	0	1
	2	0
	1	2
	1	1
	1	3
	0	0
	0	0
	2	0
	1	1
	0	2
	0	0
	0	4
	0	1
	0	1
	1	0
	0	1
	0	1
	0	1
	0	1
	0	0
	1	0
	0	0
	0	2
	0	2
	0	0
	0	1
	0	0
	1	0
	0	0
	1	0
		1
		0
		1
		1
		0
		1
		2
		2
		1
		1
		0
		0
		0
		2
		0
		1
		0
		0
		1
		0
		3

## Sheet: Fig 1D
	Native	Het or Homo
	108	968
	68.75	847
	52.65	486
	27.5625	320
	27.38	245
	24.5	162
	18	144
	6	126
	6	75
	4	61.364
	0.5	50.625
		50.625
		28.88
		24.5
		24.5
		18
		13.5
		8.82
		6
		4
		4
		3.24
		1.352
		1
		0.5
		800
		550
		408.212
		405
		269.5
		220.5
		126
		100
		50.625
		40
		14.896
		7.8125
		4
		1.44
		1.08
		0.5
		0.5

## Sheet: Fig 1E
		<100 mm3	100 mm3
	Native	91	9
	Het	68	32
	Homo	53	47

## Sheet: Fig 1 - supplemental 1B
	Native	Het	Homo
	0	18	40
	126	0	0
	6	163	0.5
	0	847	0.5
	24.5	571	0
	0	0	100
	0	0	346.5
	4.5	0	551.08
	68.75	4	4
	0	125.625	50.625
	0	0	0
	0	117.984	0
	0	486	0
	0	4	1069.5
	27.5625	0	0
	0	1.352	7.8125
	0	8.82	0
	0	126	0
	0	0.5	1.44
	0	0	0
	52.65	0	828.109
	0	0
	0	1112
	0	64.125
	0	0
	0	24.5
	0	0
	6	0
	0	0
	27.38	0

## Sheet: Fig 1 - supplemental 1C
	Native	Het	Homo
	0	1	1
	2	0	0
	1	2	1
	1	1	1
	1	3	0
	0	0	1
	0	0	2
	2	0	2
	1	1	1
	0	2	1
	0	0	0
	0	4	0
	0	1	0
	0	1	2
	1	0	0
	0	1	1
	0	1	0
	0	1	0
	0	1	1
	0	0	0
	1	0	3
	0	0
	0	2
	0	2
	0	0
	0	1
	0	0
	1	0
	0	0
	1	0

## Sheet: Fig 1 - supplemental 1D
		No tumor	Tumor
	Native	67	33
	Het	47	53
	Homo	43	57

## Sheet: Fig 1 - supplemental 1E
	Native	Het	Homo
	108	968	800
	68.75	847	550
	52.65	486	408.212
	27.5625	320	405
	27.38	245	269.5
	24.5	162	220.5
	18	144	126
	6	126	100
	6	75	50.625
	4	61.364	40
	0.5	50.625	14.896
		50.625	7.8125
		28.88	4
		24.5	1.44
		24.5	1.08
		18	0.5
		13.5	0.5
		8.82
		6
		4
		4
		3.24
		1.352
		1
		0.5
