# Supplementary material for: Signaling levels mold the RAS mutation tropism of urethane
Source: eLife. 2021 May 17;10:e67172. doi: 10.7554/eLife.67172 (PMC8128437; doi:10.7554/eLife.67172)
Supplement: Figure 2—source data 1. [file elife-67172-fig2-data1.xlsx]

## Sheet: Fig 2B
	p53+/+	p53-/-
	2.25	968
	1.08	847
	0.7	486
	0.55	320
	0.5	245
	0.5	162
	0.5	144
	0.5	126
	0.5	75
	0.5	61.364
	0.5	50.625
	0.384	50.625
	0.32	28.88
	0.256	24.5
	0.125	24.5
	0.125	18
		13.5
		8.82
		6
		4
		4
		3.24
		1.352
		1
		0.5

## Sheet: Fig 2C
		12&13	61
	p53+/+ ex3op	100	0
	p53-/- nat	60	40
	p53-/- ex3op	60	40

## Sheet: Fig 2 - supplemental 1A
		Recombined	Wildtype
	p53-/- Ctrl	64	36
	p53+/+ Ctrl	0	100
	757 T1	43	57
	757 T2	3	97
	790 T1	2	98
	790 T2	0	100
	794 T1	1	99
	795 T2	0	100
	795T1	1	99
	844 T1	6	94
	846 T1	1	99
	846 T2	12	88
	921 T1	7	93
	923 T1	0	100
	924 T1	1	99
	978 T1	26	74
	1088 T2	8	92
	1088 T3	0	100

## Sheet: Fig 2 - supplemental 1B
	p53+/+	p53-/-
	0	18
	0	0
	0.625	163
	0.5	847
	0.625	571
	0	0
	1.08	0
	0.756	0
	0	4
	0	125.625
	3.334	0
	0.5	117.984
	0	486
	0	4
	0.32	0
	0.5	1.352
	0.55	8.82
		126
		0.5
		0
		0
		0
		1112
		64.125
		0
		24.5
		0
		0
		0
		0

## Sheet: Fig 2 - supplemental 1C
	p53+/+	p53-/-
	0	1
	0	0
	2	2
	1	1
	2	3
	0	0
	1	0
	2	0
	0	1
	0	2
	3	0
	1	4
	0	1
	0	1
	1	0
	1	1
	1	1
		1
		1
		0
		0
		0
		2
		2
		0
		1
		0
		0
		0
		0
