# Supplementary material for: Signaling levels mold the RAS mutation tropism of urethane
Source: eLife. 2021 May 17;10:e67172. doi: 10.7554/eLife.67172 (PMC8128437; doi:10.7554/eLife.67172)
Supplement: Figure 3—source data 1. [file elife-67172-fig3-data1.xlsx]

## Sheet: Fig 3C
	Krasnat/nat				Krasex3op/ex3op
	CA>CT		GG>GA		CA>CT		GG>GA
	UR	PBS	UR	PBS	UR	PBS	UR	PBS
	1.81261	0	0	1.11	1.3	0	0.557	0
	1.47768	0	2.03	0	3.92	0	1.72	0
	0	0	0	0	3.96	0	0	0.878
	3.62521	1.3	0.625	1.11	6.52	2.66	0.557	0
	1.47768	0	0	0	1.31	1.15	1.15	0
	0	0	2.41	0	0	0	2.98	0.878
	10.8756	1.3	0.625	0	6.52	0	0	0
	4.43304	0	0	0	13.1	0	1.15	0
	0	0	1.61	0	7.92	0	0	0
	9.06303	1.3	1.88	0	16.9	0	0	1.07
	11.8214	0	0	0	7.84	0	0	0
	0	0	1.61	0	11.9	36.4	0	1.76
	7.25042	0	0	4.43	13	0	0	0
	2.95536	0	1.36	0	10.5	0	0.573	3.3
	0	0	3.22	4.03	3.96	0	2.98	0
	3.62521	1.3	0.625	0	19.5	0	0	1.07
	14.7768	0	0	0	3.92	0	0	0
	0	0	0.804	3.02	0	0	2.98	0.878
	1.81261	0	0.625	0	5.21	0	0.557	0
	2.95536	0	0	2.15	0	0	0	0
	0	0	0.804	2.02	3.96	0	0	0
	9.06303	0	0	0	11.7	1.33	0	0
	10.3438	0	0.678	0	14.4	1.15	0	0
	0	0	2.41	1.01	0	0	2.98	0
			0	0			1.67	3.22
			0.678	1.07			0	0
			1.61	0			0	0
			0.625	0			0	0
			1.36	1.07			2.29	0
			0.804	1.01			0	0.878

## Sheet: Fig 3 - supplemental 1B
	Krasnat/nat				Krasex3op/ex3op
	CA>CT		GG>GA		CA>CT		GG>GA
	UR	PBS	UR	PBS	UR	PBS	UR	PBS
	1.9	0	0	0	0	0	0	0
	0	0	4.82	0	0	0	0	3.39307
	0	0	0	0	0	0	0	0
	0	0	0	0	0	0	0	1.34348
	1.9	0	0	0	0	0	1.16509	0
	0	0	1.02	0	0	0	0	0
	0	0	0	0	0	0	1.79515	0
	3.16	0	4.82	0	0	0	0	0
	6.32	0	0	1.98	0	0	0	0
	3.16	0	0	0	0	0	0	1.34348
	0	0	0	3.72	4.85113	0	1.16509	0
	0	0	2.04	0	0	0	0	0
	1.71	0	0	0	0	0	1.79515	0
	1.71	0	0	3.72	2.77053	0	1.16509	0
	0	0	0	0	0	0	0	0
	0	0	0	0	0	0.89122	0	1.34348
	1.71	0	0	0	5.54106	0	2.33017	0
	0	0	0	0	0	0	1.66438	0
	1.9	0	0	0	4.09931	0	0	0
	0	0	0	0	0	0	0	0
	8.53	2.84	1.02	0.989	0	0	1.66438	0
	1.9	0	0	0	0	0	0	0
	0	0	0	0	4.85113	0	0	0
	3.41	0	1.02	0	0	0	0	0
			0	1.37			0	4.03045
			0	0			0	0
			2.04	0			1.66438	0
			0	0			0	0
			9.64	0			2.33017	3.39307
			0	0			0	0

## Sheet: Fig 3 - supplemental 1C
	Krasnat/nat				Krasex3op/ex3op
	CA>CT		GG>GA		CA>CT		GG>GA
	UR	PBS	UR	PBS	UR	PBS	UR	PBS
	0	0	1.57	0	0	0	0	0
	0	0	1.81	0	0	0	1.7287	0
	0	0	0	0	0	0	2.87106	0
	0	0	0	0	1.2678	0	0	0
	4.21	0	0	0	1.2678	0	0	0
	0	0	0	0	0	0	0	0
	0	0	1.57	0	2.22815	0	0	2.51577
	0	0	0	0	2.22815	0	0	0
	0	0	0	0	2.22815	0	0	0
	0	0	1.57	1.36	6.68446	0	0	2.51577
	2.38	0	0	0	2.22815	0	0	2.81986
	0	0	0	1.37	0	0	0	0
	2.08	0	4.71	0	0	0	1.4376	2.51577
	0	0	0	0	0	0	1.7287	2.81986
	1.04	0	0.944	2.74	0	0	0	1.74044
	1.04	0	0	0	0.985256	0	0	0
	1.04	0	1.81	0	1.97051	0	0	0
	0	0	0	0	1.97051	0	0	0
	0	0	3.14	0	0.985256	0	0	0
	7.15	0	1.81	0	64.6165	0	1.7287	0
	0	0	0	0	64.6579	0	0	1.74044
	8.43	0	1.57	1.36	0	1.81039	1.4376	2.51577
	2.38	0	0	2.71	2.22815	0	0	0
	0	0	0.944	0	0.985256	0	0	1.74044
			0	0			1.4376	0
			0	2.71			0	0
			0	0			1.43553	0
			3.14	0			1.4376	2.51577
			0	0			1.7287	2.81986
			0.944	0			1.43553	0
