# Supplementary material for: Signaling levels mold the RAS mutation tropism of urethane
Source: eLife. 2021 May 17;10:e67172. doi: 10.7554/eLife.67172 (PMC8128437; doi:10.7554/eLife.67172)
Supplement: Supplementary file 1. [file elife-67172-supp1.xlsx]

## Sheet: Mouse & Tumor information
Mouse ID	Genotype	Tamoxifen treated	Tumor ID (NA: no tumor)	Tumor size (mm3)	Kras status	Kras allele mutated	log10 (allelic ratio Kras mutant vs. WT)	p53-/- by PCR genotyping (NA: poor DNA quality)	p53-/- by qPCR (NA: poor DNA quality)
674	Krasnat/ex3op	YES	T1	18	WT	NA	NA	YES	Not checked
680	Krasnat/nat	YES	T1	108	WT	NA	NA	NA	Not checked
680	Krasnat/nat	YES	T2	18	12V	native	Undetermined	NA	Not checked
681	Krasnat/ex3op	YES	NA	NA	NA	NA	NA	Not checked	Not checked
724	Krasnat/nat	YES	T1	6	61L	native	-0.339017	YES	Not checked
750	Krasnat/ex3op	YES	T1	1	WT	NA	NA	YES	Not checked
750	Krasnat/ex3op	YES	T2	162	12D	ex3op	0.0878892	YES	Not checked
752	Krasex3op/ex3op	YES	T1	40	WT	NA	NA	YES	Not checked
753	Krasnat/nat	YES	NA	NA	NA	NA	NA	Not checked	Not checked
754	Krasnat/nat	YES	T1	24.5	61H	native	-0.00218911	YES	Not checked
755	Krasnat/ex3op	YES	T1	847	12D	native	0.781454	NA	Not checked
756	Krasnat/ex3op	YES	T1	320	12D	ex3op	0.451365	YES	Not checked
756	Krasnat/ex3op	YES	T2	245	61L	ex3op	0.0159601	YES	Not checked
756	Krasnat/ex3op	YES	T3	6	WT	NA	NA	YES	Not checked
757	Krasnat/ex3op	NO	T1	9.375	12D	ex3op	0.524336	YES	YES
757	Krasnat/ex3op	NO	T2	0.5	WT	NA	NA	NO	NO
762	Krasnat/ex3op	YES	NA	NA	NA	NA	NA	Not checked	Not checked
763	Krasnat/ex3op	NO	NA	NA	NA	NA	NA	YES	Not checked
764	Krasex3op/ex3op	YES	NA	NA	NA	NA	NA	Not checked	Not checked
768	Krasnat/ex3op	YES	NA	NA	NA	NA	NA	Not checked	Not checked
769	Krasnat/ex3op	NO	NA	NA	NA	NA	NA	YES	Not checked
770	Krasex3op/ex3op	YES	T1	0.5	12C	ex3op	-0.178839	YES	Not checked
789	Krasex3op/ex3op	YES	T1	0.5	12S	ex3op	-0.0814897	Not checked	Not checked
790	Krasnat/ex3op	NO	T1	0.125	WT	NA	NA	YES	NO
790	Krasnat/ex3op	NO	T2	0.5	WT	NA	NA	YES	NO
793	Krasnat/ex3op	YES	NA	NA	NA	NA	NA	Not checked	Not checked
794	Krasnat/ex3op	NO	T1	0.5	WT	NA	NA	NO	NO
795	Krasnat/ex3op	NO	T1	0.5	WT	NA	NA	NO	NO
795	Krasnat/ex3op	NO	T2	0.125	WT	NA	NA	NO	NO
798	Krasnat/ex3op	YES	T1	4	12C	ex3op	0.353907	YES	Not checked
811	Krasnat/nat	YES	NA	NA	NA	NA	NA	Not checked	Not checked
812	Krasnat/nat	YES	T1_BULK	750	WT	NA	NA	YES	Not checked
812	Krasnat/nat	YES	T1_S1	13.5	WT	NA	NA	YES	Not checked
812	Krasnat/nat	YES	T1_S2	0.75	WT	NA	NA	YES	Not checked
812	Krasnat/nat	YES	T2	12.5	WT	NA	NA	YES	Not checked
812	Krasnat/nat	YES	T3	3.24	WT	NA	NA	YES	Not checked
812	Krasnat/nat	YES	T4	87.5	12D	native	0.373658	YES	Not checked
812	Krasnat/nat	YES	T5	75	12D	native	0.571744	YES	Not checked
812	Krasnat/nat	YES	T6	75	12D	native	0.35408	YES	Not checked
813	Krasnat/nat	YES	NA	NA	NA	NA	NA	Not checked	Not checked
814	Krasnat/nat	YES	T1	4	61H	native	-0.163945	YES	Not checked
814	Krasnat/nat	YES	T2	0.5	12D	native	-0.444839	NO	Not checked
836	Krasnat/ex3op	YES	T1	75	61H	ex3op	0.126029	YES	Not checked
836	Krasnat/ex3op	YES	T2	50.625	12D	ex3op	0.332344	YES	Not checked
843	Krasnat/ex3op	NO	NA	NA	NA	NA	NA	YES	Not checked
844	Krasnat/ex3op	NO	T1	1.08	61R	native	-0.549562	YES	NO
846	Krasnat/ex3op	NO	T1	0.5	WT	NA	NA	NO	NO
846	Krasnat/ex3op	NO	T2	0.256	WT	NA	NA	NO	NO
853	Krasnat/ex3op	NO	NA	NA	NA	NA	NA	YES	Not checked
855	Krasnat/ex3op	NO	NA	NA	NA	NA	NA	YES	Not checked
856	Krasnat/nat	YES	T1	68.75	61L	native	-0.286696	YES	Not checked
857	Krasnat/nat	YES	NA	NA	NA	NA	NA	Not checked	Not checked
858	Krasnat/nat	YES	NA	NA	NA	NA	NA	Not checked	Not checked
859	Krasnat/ex3op	YES	NA	NA	NA	NA	NA	Not checked	Not checked
869	Krasnat/ex3op	YES	T1	3.24	WT	NA	NA	YES	Not checked
869	Krasnat/ex3op	YES	T2	61.364	61R	ex3op	-0.155493	YES	Not checked
869	Krasnat/ex3op	YES	T3	24.5	61H	ex3op	0.121478	YES	Not checked
869	Krasnat/ex3op	YES	T4	28.88	12D	ex3op	0.359154	YES	Not checked
874	Krasnat/ex3op	YES	T1	486	WT	NA	NA	NA	Not checked
875	Krasnat/ex3op	YES	T1	4	WT	NA	NA	YES	Not checked
876	Krasnat/nat	YES	NA	NA	NA	NA	NA	Not checked	Not checked
878	Krasnat/ex3op	YES	NA	NA	NA	NA	NA	Not checked	Not checked
880	Krasnat/nat	YES	NA	NA	NA	NA	NA	Not checked	Not checked
882	Krasnat/nat	YES	NA	NA	NA	NA	NA	Not checked	Not checked
893	Krasnat/ex3op	YES	T1	1.352	WT	NA	NA	YES	Not checked
894	Krasnat/nat	YES	T1	27.5625	61R	native	-0.0144778	NA	Not checked
896	Krasex3op/ex3op	YES	NA	NA	NA	NA	NA	Not checked	Not checked
897	Krasex3op/ex3op	YES	T1	100	WT	NA	NA	NA	Not checked
898	Krasnat/ex3op	YES	T1	8.82	13D	ex3op	0.976377	YES	Not checked
899	Krasnat/nat	YES	NA	NA	NA	NA	NA	Not checked	Not checked
908	Krasex3op/ex3op	YES	T1	4	Undetermined	NA	NA	YES	Not checked
909	Krasex3op/ex3op	YES	NA	NA	NA	NA	NA	Not checked	Not checked
910	Krasex3op/ex3op	YES	T1	50.625	61H	ex3op	0.185595	NA	Not checked
911	Krasnat/ex3op	YES	T1	0.5	12D	native	-0.485873	YES	Not checked
912	Krasex3op/ex3op	YES	NA	NA	NA	NA	NA	Not checked	Not checked
913	Krasnat/nat	YES	NA	NA	NA	NA	NA	Not checked	Not checked
914	Krasex3op/ex3op	YES	T1	550	WT	NA	NA	NA	Not checked
914	Krasex3op/ex3op	YES	T2	1.08	Undetermined	NA	NA	YES	Not checked
915	Krasnat/ex3op	YES	T1	13.5	WT	NA	NA	NA	Not checked
915	Krasnat/ex3op	YES	T2	50.625	12D	native	0.0774301	YES	Not checked
916	Krasnat/ex3op	YES	NA	NA	NA	NA	NA	Not checked	Not checked
917	Krasnat/nat	YES	NA	NA	NA	NA	NA	Not checked	Not checked
918	Krasnat/ex3op	NO	NA	NA	NA	NA	NA	YES	Not checked
919	Krasnat/nat	YES	NA	NA	NA	NA	NA	Not checked	Not checked
920	Krasnat/nat	YES	T1	52.65	WT	NA	NA	NA	Not checked
921	Krasnat/ex3op	NO	T1	0.32	WT	NA	NA	YES	NO
923	Krasnat/ex3op	NO	T1	0.5	12D	ex3op	0.0958021	NO	NO
924	Krasnat/ex3op	NO	T1	0.55	12D	ex3op	0.134969	NO	NO
925	Krasnat/ex3op	YES	NA	NA	NA	NA	NA	Not checked	Not checked
926	Krasnat/ex3op	YES	NA	NA	NA	NA	NA	Not checked	Not checked
928	Krasnat/nat	YES	NA	NA	NA	NA	NA	Not checked	Not checked
929	Krasnat/nat	YES	NA	NA	NA	NA	NA	Not checked	Not checked
930	Krasnat/ex3op	YES	NA	NA	NA	NA	NA	Not checked	Not checked
931	Krasnat/ex3op	YES	T1	126	61R	native	-0.544488	YES	Not checked
932	Krasex3op/ex3op	YES	NA	NA	NA	NA	NA	Not checked	Not checked
951	Krasnat/nat	YES	NA	NA	NA	NA	NA	Not checked	Not checked
952	Krasnat/ex3op	YES	T1	144	WT	NA	NA	YES	Not checked
952	Krasnat/ex3op	YES	T2	968	61L	native	-0.219463	NA	Not checked
954	Krasnat/nat	YES	NA	NA	NA	NA	NA	Not checked	Not checked
978	Krasnat/ex3op	NO	T1	0.5	12V	ex3op	-0.0191504	YES	NO
979	Krasex3op/ex3op	YES	NA	NA	NA	NA	NA	Not checked	Not checked
980	Krasnat/ex3op	YES	NA	NA	NA	NA	NA	Not checked	Not checked
981	Krasnat/ex3op	NO	NA	NA	NA	NA	NA	YES	Not checked
982	Krasex3op/ex3op	YES	T1	269.5	12D	ex3op	0.214229	YES	Not checked
982	Krasex3op/ex3op	YES	T2	800	Undetermined	NA	NA	NA	Not checked
983	Krasnat/nat	YES	NA	NA	NA	NA	NA	Not checked	Not checked
984	Krasnat/ex3op	YES	T1	24.5	WT	NA	NA	NA	Not checked
1032	Krasex3op/ex3op	YES	T1	405	WT	NA	NA	YES	Not checked
1032	Krasex3op/ex3op	YES	T2	14.896	12D	ex3op	0.0356705	NA	Not checked
1032	Krasex3op/ex3op	YES	T4	408.213	12D	ex3op	0.282309	NA	Not checked
1034	Krasnat/ex3op	YES	NA	NA	NA	NA	NA	Not checked	Not checked
1035	Krasex3op/ex3op	YES	T1	1.44	WT	NA	NA	NA	Not checked
1036	Krasnat/nat	YES	NA	NA	NA	NA	NA	Not checked	Not checked
1037	Krasex3op/ex3op	YES	NA	NA	NA	NA	NA	Not checked	Not checked
1038	Krasex3op/ex3op	YES	T2	7.8125	12D	ex3op	-0.114463	YES	Not checked
1039	Krasnat/ex3op	YES	NA	NA	NA	NA	NA	Not checked	Not checked
1043	Krasnat/ex3op	YES	NA	NA	NA	NA	NA	Not checked	Not checked
1044	Krasnat/nat	YES	T1	6	WT	NA	NA	NA	Not checked
1045	Krasnat/nat	YES	NA	NA	NA	NA	NA	Not checked	Not checked
1046	Krasex3op/ex3op	YES	NA	NA	NA	NA	NA	Not checked	Not checked
1085	Krasnat/nat	YES	T1	27.38	61H	native	-0.230438	YES	Not checked
1086	Krasnat/nat	YES	NA	NA	NA	NA	NA	Not checked	Not checked
1087	Krasex3op/ex3op	YES	NA	NA	NA	NA	NA	Not checked	Not checked
1088	Krasnat/ex3op	NO	T1	2.25	WT	NA	NA	NA	NA
1088	Krasnat/ex3op	NO	T2	0.384	WT	NA	NA	NO	NO
1088	Krasnat/ex3op	NO	T3	0.7	12D	ex3op	-0.109144	YES	NO
766_1	Krasex3op/ex3op	YES	T1	126	61R	ex3op	-0.310453	YES	Not checked
766_1	Krasex3op/ex3op	YES	T2	220.5	61R	ex3op	-0.150118	YES	Not checked
766_2	Krasnat/nat	YES	NA	NA	NA	NA	NA	YES	Not checked
