# Supplementary material for: Signaling levels mold the RAS mutation tropism of urethane
Source: eLife. 2021 May 17;10:e67172. doi: 10.7554/eLife.67172 (PMC8128437; doi:10.7554/eLife.67172)
Supplement: Supplementary file 2. [file elife-67172-supp2.xlsx]

## Sheet: Kras exon 1 129 strain
Mutation frequency of Kras exon 1 in Krasnat/nat or Krasex3op/ex3op mice
Sample name: treatment (UR: urethane)_genotype (nat: Krasnat/nat, ex3op: Krasex3op/ex3op)_mouse ID
Nucleotide: “-” indicates nucleotides upstream of ATG start codon in 5’UTR, “111+” indicates nucleotides in the intron downstream of exon 1
Nucleotide	Substitution	Nucleotide context	UR_ex3op_364	UR_nat_363	PBS_ex3op_371	PBS_nat_366	PBS_nat_1	PBS_nat_4	PBS_ex3op_2	PBS_ex3op_3	UR_nat_5	UR_nat_7	UR_ex3op_6	UR_ex3op_8
-2	AC	AAA	0	0	0	0	0	0	0	0	6.25005e-07	0	0	5.73236e-07
-2	AG	AAA	0	8.04296e-07	0	0	1.10713e-06	0	0	3.29787e-06	1.25001e-06	3.38835e-06	0	0
-2	AT	AAA	0	0	0	0	1.10713e-06	0	0	1.09929e-06	0	2.71068e-06	0	0
-1	AC	AAA	0	0	8.77915e-07	0	0	0	0	0	0	0	0	0
-1	AG	AAA	0	0	0	0	1.10713e-06	1.07296e-06	8.59767e-06	2.19858e-06	6.25005e-07	1.35534e-06	1.11372e-05	6.87883e-06
-1	AT	AAA	0	0	0	0	0	1.07296e-06	1.07471e-06	0	0	0	3.34116e-06	5.15912e-06
1	AC	AAT	0	0	0	0	0	0	0	0	0	0	0	0
1	AG	AAT	0	0	0	0	1.10713e-05	0	0	2.19858e-06	5.00004e-06	2.03301e-06	5.56861e-07	1.14647e-06
1	AT	AAT	0	0	0	1.00807e-06	2.21425e-06	0	0	0	1.25001e-06	0	0	5.73236e-07
2	TA	ATG	0	8.04296e-07	8.77915e-07	0	0	0	0	0	0	0	5.56861e-07	0
2	TC	ATG	0	8.04296e-07	0	0	0	0	0	0	0	0	1.11372e-06	5.73236e-07
2	TG	ATG	0	0	0	0	0	0	0	2.19858e-06	0	0	4.45489e-06	0
3	GA	TGA	0	0	0	2.01614e-06	1.10713e-06	0	0	0	6.25005e-07	6.7767e-07	0	5.73236e-07
3	GC	TGA	0	0	0	0	0	0	0	0	0	0	0	0
3	GT	TGA	0.000366648	7.23866e-06	1.22908e-05	1.5121e-05	6.64275e-06	8.58369e-06	3.22413e-06	2.19858e-06	3.75003e-06	4.06602e-06	6.12547e-06	9.17178e-06
4	AC	GAC	0	0	0	0	0	0	0	0	0	0	0	0
4	AG	GAC	0	0	0	3.02421e-06	3.32138e-06	5.36481e-06	2.14942e-06	2.19858e-06	6.25005e-07	2.03301e-06	1.67058e-06	9.17178e-06
4	AT	GAC	0	0	0	0	0	0	0	0	6.25005e-07	0	0	0
5	CA	ACT	0	0	0	0	0	0	0	0	0	0	0	0
5	CG	ACT	0	0	0	0	0	0	3.22413e-06	3.29787e-06	0	4.06602e-06	2.7843e-06	0
5	CT	ACT	8.94262e-06	8.04296e-07	0	5.04035e-06	0	2.14592e-06	0	1.09929e-06	0	0	1.11372e-06	5.73236e-07
6	TA	CTG	2.98087e-06	0	0	2.01614e-06	0	0	0	0	1.25001e-06	0	0	0
6	TC	CTG	2.98087e-06	8.04296e-07	0	0	4.4285e-06	1.07296e-06	0	0	6.25005e-07	0	5.56861e-07	5.73236e-07
6	TG	CTG	0	0	0	0	4.4285e-06	0	1.07471e-06	0	2.50002e-06	0	5.01175e-06	5.73236e-07
7	GA	TGA	0	3.21718e-06	0	1.00807e-06	0	1.07296e-06	0	1.09929e-06	0	0	0	0
7	GC	TGA	2.98087e-06	0	8.77915e-07	0	0	0	0	0	0	6.7767e-07	0	0
7	GT	TGA	0.000220585	6.43436e-06	9.65706e-06	1.10888e-05	4.4285e-06	8.58369e-06	1.07471e-06	1.09929e-06	3.12503e-06	2.03301e-06	3.89803e-06	4.01265e-06
8	AC	GAG	0	0	0	0	0	0	0	0	0	0	0	0
8	AG	GAG	0	0	1.75583e-06	0	0	2.14592e-06	1.07471e-06	0	0	1.35534e-06	0	0
8	AT	GAG	0	0	0	0	0	0	0	0	0	6.7767e-07	0	0
9	GA	AGT	0	0	8.77915e-07	2.01614e-06	0	0	0	0	6.25005e-07	0	0	1.71971e-06
9	GC	AGT	0	0	0	0	0	1.07296e-06	0	0	0	0	0	0
9	GT	AGT	0.000265298	0	0	1.00807e-06	3.32138e-06	0	1.07471e-06	2.19858e-06	6.25005e-07	1.35534e-06	6.12547e-06	3.43942e-06
10	TA	GTA	0	2.41289e-06	0	1.00807e-06	0	0	0	0	0	0	0	0
10	TC	GTA	0	0	0	0	0	0	2.14942e-06	0	0	6.7767e-07	0	0
10	TG	GTA	0	0	0	1.00807e-06	3.32138e-06	0.00017382	2.14942e-06	0	1.25001e-06	0	5.56861e-07	0.000111781
11	AC	TAT	0	0	0	0	0	0	0	0	0	0	0	0
11	AG	TAT	0	0	0	0	2.21425e-06	0	0	0.000180284	6.25005e-07	0.000117237	5.56861e-07	2.29294e-06
11	AT	TAT	2.98087e-06	0	0	0	0	0	1.07471e-06	0	0	6.7767e-07	5.56861e-07	0
12	TA	ATA	0	4.02148e-06	8.77915e-07	2.01614e-06	0	4.29185e-06	0	0	0	0	5.56861e-07	1.03182e-05
12	TC	ATA	0	0	0	0	1.10713e-06	0	1.07471e-06	0	6.25005e-07	0	0	0
12	TG	ATA	0	0	0	0	0	1.39485e-05	0.000177327	2.19858e-06	0	3.38835e-06	0.000117498	6.53489e-05
13	AC	TAA	0	0	0	0	0	0	0	0	0	0	0	0
13	AG	TAA	0	0	0	1.00807e-06	0.000123998	7.51073e-06	1.07471e-06	1.75886e-05	0.000118751	2.84621e-05	1.11372e-06	2.63689e-05
13	AT	TAA	0	0	0	0	0	0	0	2.19858e-06	0	2.71068e-06	0	0
14	AC	AAA	0	0	0	0	0	0	0	0	0	0	0	0
14	AG	AAA	0	8.04296e-07	0	1.00807e-06	5.53563e-06	0	2.04195e-05	2.30851e-05	1.87502e-06	1.96524e-05	2.7843e-05	5.73236e-07
14	AT	AAA	0	0	0	0	0	0	2.14942e-06	0	0	0	5.56861e-07	0
15	AC	AAC	0	0	0	0	0	0	0	0	0	0	5.56861e-07	0
15	AG	AAC	0	0	0	0	4.31779e-05	2.14592e-06	1.18218e-05	0	1.75001e-05	1.35534e-06	1.44784e-05	9.74501e-06
15	AT	AAC	2.98087e-06	8.04296e-07	8.77915e-07	0	3.32138e-06	0	0	0	6.25005e-07	0	0	5.73236e-07
16	CA	ACT	2.98087e-06	0	3.51166e-06	2.01614e-06	0	0	0	0	0	6.7767e-07	0	0
16	CG	ACT	5.96175e-06	4.02148e-06	0	4.03228e-06	1.99283e-05	0	0	3.29787e-06	2.00002e-05	3.38835e-06	0	0
16	CT	ACT	8.94262e-06	8.04296e-07	0	1.00807e-06	0	0	0	2.19858e-06	1.25001e-06	0	5.56861e-07	5.73236e-07
17	TA	CTT	0	8.04296e-07	1.75583e-06	0	0	0	0	0	0	0	0	1.71971e-06
17	TC	CTT	0	0	8.77915e-07	0	0	0	0	0	6.25005e-07	6.7767e-07	0	0
17	TG	CTT	0	0	1.75583e-06	0	0	4.29185e-06	7.52296e-06	0	0	0	4.45489e-06	9.17178e-06
18	TA	TTG	0	2.41289e-06	1.75583e-06	3.02421e-06	0	0	0	0	1.25001e-06	0	0	0
18	TC	TTG	0	0	0	0	0	0	0	0	0	0	0	1.14647e-06
18	TG	TTG	0	0	0	0	8.857e-06	0	0	6.59574e-06	2.50002e-06	8.13204e-06	0	0
19	GA	TGT	0	1.60859e-06	0	0	0	1.07296e-06	0	0	6.25005e-07	0	1.11372e-06	5.73236e-07
19	GC	TGT	0	0	0	0	0	0	0	0	6.25005e-07	0	0	0
19	GT	TGT	0.00013712	0	3.51166e-06	1.00807e-06	2.21425e-06	1.07296e-06	0	2.19858e-06	4.37504e-06	2.03301e-06	2.7843e-06	2.29294e-06
20	TA	GTG	0	8.04296e-07	8.77915e-07	0	0	1.07296e-06	0	1.09929e-06	0	0	0	1.14647e-06
20	TC	GTG	2.98087e-06	0	8.77915e-07	2.01614e-06	2.21425e-06	0	2.14942e-06	1.09929e-06	0	6.7767e-07	1.67058e-06	5.73236e-07
20	TG	GTG	0	0	0	0	5.53563e-06	0	0	0	3.75003e-06	0	0	1.14647e-06
21	GA	TGG	2.98087e-06	0	0	2.01614e-06	0	0	0	0	1.25001e-06	0	5.56861e-07	0
21	GC	TGG	0	0	0	0	0	0	0	0	0	0	0	0
21	GT	TGG	0.000211642	1.60859e-06	4.38957e-06	5.04035e-06	1.10713e-06	3.21888e-06	4.29883e-06	2.19858e-06	3.12503e-06	3.38835e-06	4.45489e-06	2.29294e-06
22	GA	GGT	2.98087e-06	8.04296e-07	8.77915e-07	3.02421e-06	0	0	1.07471e-06	0	6.25005e-07	0	0	0
22	GC	GGT	0	0	0	0	0	0	0	0	0	0	0	0
22	GT	GGT	0.00016991	8.04296e-07	0	2.01614e-06	4.4285e-06	3.21888e-06	4.29883e-06	0	3.12503e-06	2.03301e-06	1.67058e-06	1.14647e-06
23	TA	GTG	0	0	0	2.01614e-06	1.10713e-06	0	0	3.29787e-06	1.87502e-06	0	1.11372e-06	5.73236e-07
23	TC	GTG	0	0	0	0	1.10713e-06	1.07296e-06	0	0	0	1.35534e-06	0	2.29294e-06
23	TG	GTG	0	0	8.77915e-07	1.00807e-06	0	0	1.07471e-06	4.39716e-06	0	4.06602e-06	0	0
24	GA	TGG	0	1.60859e-06	0	3.02421e-06	0	1.07296e-06	0	0	6.25005e-07	0	5.56861e-07	5.73236e-07
24	GC	TGG	0	0	0	0	0	1.07296e-06	0	0	0	0	0	0
24	GT	TGG	0.000199719	8.04296e-07	1.58025e-05	3.02421e-06	1.10713e-06	3.21888e-06	0	4.39716e-06	4.37504e-06	2.71068e-06	5.56861e-06	5.15912e-06
25	GA	GGT	0	8.04296e-07	0	2.01614e-06	0	2.14592e-06	0	0	6.25005e-07	0	5.56861e-07	0
25	GC	GGT	0	0	0	0	0	0	0	0	0	6.7767e-07	0	0
25	GT	GGT	0.00027126	2.41289e-06	2.63374e-06	3.02421e-06	2.21425e-06	1.07296e-06	4.29883e-06	2.19858e-06	1.25001e-06	3.38835e-06	3.34116e-06	1.71971e-06
26	TA	GTT	0	1.60859e-06	1.75583e-06	3.02421e-06	0	0	0	0	0	0	5.56861e-07	0
26	TC	GTT	5.96175e-06	0	0	0	0	0	1.07471e-06	1.09929e-06	6.25005e-07	6.7767e-07	5.56861e-07	0
26	TG	GTT	0	0	0	0	0	4.29185e-06	9.67238e-06	0	0	0	8.90977e-06	1.37577e-05
27	TA	TTG	5.96175e-06	1.60859e-05	8.77915e-07	1.31049e-05	1.10713e-06	1.07296e-06	0	0	0	1.35534e-06	0	0
27	TC	TTG	2.98087e-06	0	1.75583e-06	2.01614e-06	3.32138e-06	2.14592e-06	2.14942e-06	0	3.12503e-06	6.7767e-07	1.11372e-06	1.71971e-06
27	TG	TTG	0	0	1.75583e-06	0	1.99283e-05	0	0	9.89361e-06	2.12502e-05	1.15204e-05	0	0
28	GA	TGG	0	3.21718e-06	0	1.00807e-06	1.10713e-06	0	0	0	0	0	5.56861e-07	0
28	GC	TGG	0	0	0	0	0	0	0	0	0	0	0	0
28	GT	TGG	0.000208661	8.04296e-07	6.1454e-06	4.03228e-06	5.53563e-06	5.36481e-06	2.14942e-06	1.09929e-06	2.50002e-06	2.03301e-06	4.45489e-06	2.86618e-06
29	GA	GGA	0	0	8.77915e-07	0	1.10713e-06	0	0	0	0	2.03301e-06	5.56861e-07	1.71971e-06
29	GC	GGA	0	8.04296e-07	0	0	0	0	0	0	0	0	0	0
29	GT	GGA	0.000324915	3.21718e-06	6.1454e-06	5.04035e-06	6.64275e-06	9.65665e-06	7.52296e-06	1.20922e-05	6.25005e-06	4.74369e-06	6.12547e-06	5.15912e-06
30	AC	GAG	0	0	0	0	0	0	0	0	0	0	0	0
30	AG	GAG	2.98087e-06	8.04296e-07	8.77915e-07	0	2.21425e-06	6.43777e-06	2.14942e-06	2.08865e-05	1.87502e-06	2.30408e-05	1.67058e-06	1.14647e-06
30	AT	GAG	0	0	0	0	0	0	0	0	6.25005e-07	0	1.11372e-06	0
31	GA	AGC	0	1.60859e-06	0	1.00807e-06	0	0	1.07471e-06	8.79432e-06	0	1.15204e-05	0	1.14647e-06
31	GC	AGC	0	0	0	0	0	0	0	0	0	6.7767e-07	0	0
31	GT	AGC	0.00030703	5.63007e-06	1.22908e-05	7.05649e-06	7.74988e-06	8.58369e-06	9.67238e-06	9.89361e-06	5.62505e-06	8.80971e-06	1.05804e-05	6.3056e-06
32	CA	GCT	0	0	0	1.00807e-06	4.4285e-06	0	8.59767e-06	0	1.25001e-06	0	1.67058e-05	0
32	CG	GCT	0	8.04296e-07	0	0	3.87494e-05	0	5.37354e-06	0	1.56251e-05	0	3.89803e-06	0
32	CT	GCT	1.49044e-05	6.43436e-06	8.77915e-07	4.03228e-06	4.4285e-06	9.65665e-06	3.22413e-06	1.09929e-05	4.37504e-06	2.71068e-06	6.12547e-06	1.71971e-06
33	TA	CTG	2.98087e-06	0	0	0	2.76781e-05	1.07296e-06	0	0	1.25001e-05	1.35534e-06	5.56861e-07	5.73236e-07
33	TC	CTG	0	0	8.77915e-07	2.01614e-06	3.32138e-06	3.21888e-06	0	1.09929e-06	1.25001e-06	2.03301e-06	2.7843e-06	2.86618e-06
33	TG	CTG	0	0	0	0	3.32138e-06	0	0	0	5.00004e-06	0	0	0
34	GA	TGG	2.98087e-06	2.41289e-06	0	0	0	0	0	0	1.25001e-06	1.35534e-06	1.67058e-06	1.14647e-06
34	GC	TGG	0	0	0	0	0	0	0	1.09929e-06	0	0	0	0
34	GT	TGG	0.000196738	5.63007e-06	4.38957e-06	9.07263e-06	1.10713e-06	1.07296e-06	1.07471e-06	1.09929e-06	2.50002e-06	1.35534e-06	0	2.29294e-06
35	GA	GGT	0	8.04296e-07	8.77915e-07	1.00807e-06	0	1.07296e-06	0	0	6.25005e-07	1.35534e-06	0	2.29294e-06
35	GC	GGT	0	0	0	0	0	0	0	0	0	0	0	0
35	GT	GGT	0.000235489	8.04296e-07	6.1454e-06	3.02421e-06	2.21425e-06	2.14592e-06	1.07471e-06	0	6.87506e-06	0	1.67058e-06	5.73236e-06
36	TA	GTG	2.98087e-06	8.04296e-07	0	0	0	3.21888e-06	0	1.09929e-06	0	0	0	5.73236e-07
36	TC	GTG	0	0	8.77915e-07	3.02421e-06	1.10713e-06	0	4.29883e-06	0	1.87502e-06	1.35534e-06	0	1.14647e-06
36	TG	GTG	0	0	0	0	0	0	0	4.39716e-06	6.25005e-07	1.08427e-05	0	0
37	GA	TGG	0	0	8.77915e-07	2.01614e-06	0	1.07296e-06	2.14942e-06	9.89361e-06	0	9.48738e-06	5.56861e-07	0
37	GC	TGG	0	8.04296e-07	3.51166e-06	2.01614e-06	0	0	0	0	0	0	0	0
37	GT	TGG	0.000256355	8.04296e-07	6.1454e-06	9.07263e-06	4.4285e-06	2.14592e-06	2.14942e-06	1.09929e-06	1.25001e-06	3.38835e-06	5.56861e-06	4.58589e-06
38	GA	GGC	0	1.60859e-06	0	0	0	1.07296e-06	3.22413e-06	0	0	6.7767e-07	1.67058e-06	0
38	GC	GGC	0	8.04296e-07	0	0	0	0	0	0	0	0	0	0
38	GT	GGC	0.000223566	1.60859e-06	8.77915e-06	6.04842e-06	3.32138e-06	2.14592e-06	6.44825e-06	1.09929e-06	3.12503e-06	3.38835e-06	2.7843e-06	4.01265e-06
39	CA	GCG	0	8.04296e-07	1.75583e-06	0	1.10713e-06	1.07296e-06	0	0	1.06251e-05	0	0	2.29294e-05
39	CG	GCG	0	0	0	0	0	2.46781e-05	0	0	1.87502e-06	0	0	7.62404e-05
39	CT	GCG	0.000184814	5.38878e-05	0.000114129	6.95568e-05	7.0856e-05	4.93562e-05	6.01837e-05	6.70567e-05	5.62505e-05	5.89573e-05	6.06978e-05	7.79601e-05
40	GA	CGT	0	8.04296e-07	0	0	0	0	1.07471e-06	1.09929e-06	1.25001e-06	2.03301e-06	1.11372e-06	0
40	GC	CGT	0	0	0	0	2.21425e-06	0	0	0	0	6.7767e-07	0	0
40	GT	CGT	0.000244432	2.41289e-06	2.63374e-06	3.02421e-06	2.21425e-06	6.43777e-06	1.07471e-06	2.19858e-06	3.12503e-06	1.35534e-06	3.34116e-06	2.29294e-06
41	TA	GTA	0	0	0	0	0	0	2.14942e-06	0	0	0	1.11372e-06	0
41	TC	GTA	2.98087e-06	8.04296e-07	0	0	1.10713e-06	0	0	0	0	0	1.11372e-06	5.73236e-07
41	TG	GTA	0	0	0	0	0	0	1.827e-05	0	0	0	2.50587e-05	0
42	AC	TAG	0	0	0	0	0	0	0	0	0	0	0	0
42	AG	TAG	0	0	0	0	4.53921e-05	1.07296e-06	1.07471e-06	0	2.06252e-05	3.38835e-06	1.11372e-06	1.14647e-06
42	AT	TAG	0	0	0	0	0	0	0	0	1.87502e-06	6.7767e-07	5.56861e-07	5.73236e-07
43	GA	AGG	2.98087e-06	3.21718e-06	0	1.00807e-06	1.10713e-06	0	0	1.09929e-06	6.25005e-07	0	1.67058e-06	5.73236e-07
43	GC	AGG	5.96175e-06	0	0	0	0	0	0	0	0	0	0	0
43	GT	AGG	0.000172891	6.43436e-06	9.65706e-06	8.06456e-06	1.10713e-06	2.14592e-06	2.14942e-06	1.09929e-06	6.25005e-07	3.38835e-06	2.22744e-06	5.73236e-07
44	GA	GGC	0	1.60859e-06	1.75583e-06	0	0	0	1.07471e-06	0	1.87502e-06	0	0	0
44	GC	GGC	0	0	0	0	0	0	0	0	0	0	5.56861e-07	0
44	GT	GGC	0.00030703	6.43436e-06	4.65295e-05	3.22582e-05	6.64275e-06	5.36481e-06	4.29883e-06	3.29787e-06	6.25005e-06	5.42136e-06	6.12547e-06	7.45207e-06
45	CA	GCA	0	0	8.77915e-07	0	2.21425e-06	8.58369e-06	1.07471e-06	2.19858e-06	0	0	0	0
45	CG	GCA	0	0	8.77915e-07	0	0	0	1.07471e-06	0	0	0	5.56861e-07	0
45	CT	GCA	8.94262e-06	4.02148e-06	1.75583e-06	3.02421e-06	6.64275e-06	2.14592e-06	6.44825e-06	6.59574e-06	6.87506e-06	6.09903e-06	8.90977e-06	6.3056e-06
46	AC	CAA	0	0	0	0	0	0	0	0	0	0	0	0
46	AG	CAA	2.98087e-06	5.63007e-06	8.77915e-07	0	2.21425e-06	0	4.29883e-06	2.19858e-06	3.12503e-06	2.71068e-06	3.34116e-06	1.71971e-06
46	AT	CAA	0.000450112	0.000620916	0	0	0	0	0	0	6.25005e-06	8.13204e-06	4.45489e-06	6.87883e-06
47	AC	AAG	0	0	0	0	1.10713e-06	0	0	0	0	0	0	2.29294e-06
47	AG	AAG	0	0	0	0	1.10713e-06	6.43777e-06	0	0	6.25005e-07	1.35534e-06	0	1.31844e-05
47	AT	AAG	0	0	7.02332e-06	1.5121e-05	0	0	0	0	1.25001e-06	1.35534e-06	0	5.73236e-07
48	GA	AGA	0	0	0	0	1.10713e-06	0	0	0	0	0	0	5.73236e-07
48	GC	AGA	0	0	0	0	0	0	0	0	0	0	0	5.73236e-07
48	GT	AGA	0.000199719	4.82577e-06	5.26749e-06	4.03228e-06	3.32138e-06	5.36481e-06	4.29883e-06	1.09929e-06	6.87506e-06	4.06602e-06	3.89803e-06	3.43942e-06
49	AC	GAG	0	0	0	0	1.10713e-06	0	0	0	0	0	0	0
49	AG	GAG	0	0	8.77915e-07	2.01614e-06	3.32138e-06	2.14592e-06	4.29883e-06	2.19858e-06	0	2.71068e-06	3.89803e-06	0
49	AT	GAG	0	0	0	0	0	0	0	0	0	0	0	0
50	GA	AGC	2.98087e-06	8.04296e-07	0	3.02421e-06	0	1.07296e-06	0	0	0	0	1.11372e-06	0
50	GC	AGC	0	0	0	0	0	0	0	0	0	0	0	0
50	GT	AGC	0.000163948	8.04296e-07	0	0	2.21425e-06	1.07296e-06	1.07471e-06	0	3.12503e-06	0	3.89803e-06	0
51	CA	GCG	0	0	8.77915e-07	0	5.53563e-06	0	1.07471e-06	0	4.37504e-06	0	1.11372e-06	0
51	CG	GCG	0	0	0	0	2.21425e-06	0	0	0	4.37504e-06	0	5.56861e-07	5.73236e-07
51	CT	GCG	0.000184814	7.0778e-05	0.000137833	0.000106855	7.52845e-05	4.82833e-05	8.27525e-05	6.8156e-05	6.37505e-05	6.09903e-05	7.1835e-05	8.31192e-05
52	GA	CGC	2.98087e-06	1.60859e-06	0	1.00807e-06	2.21425e-06	0	0	1.09929e-06	1.25001e-06	1.35534e-06	5.56861e-07	1.14647e-06
52	GC	CGC	0	0	0	0	0	0	0	0	0	0	5.56861e-07	0
52	GT	CGC	0.000351743	1.04558e-05	1.49245e-05	1.5121e-05	9.96413e-06	6.43777e-06	9.67238e-06	2.19858e-06	6.25005e-06	6.09903e-06	7.79605e-06	8.59854e-06
53	CA	GCC	5.96175e-06	0	2.89712e-05	4.83873e-05	0	0	0	0	0	0	0	0
53	CG	GCC	0	0	0	0	0	1.07296e-06	0	0	0	0	5.56861e-07	0
53	CT	GCC	2.08661e-05	4.02148e-06	1.75583e-06	3.02421e-06	8.857e-06	5.36481e-06	9.67238e-06	4.39716e-06	3.12503e-06	1.01651e-05	6.12547e-06	4.58589e-06
54	CA	CCT	0	8.04296e-07	0	0	0	0	0	1.09929e-06	0	6.7767e-07	0	0
54	CG	CCT	0	0	0	0	1.10713e-06	1.07296e-06	0	1.09929e-06	0	6.7767e-07	0	5.73236e-07
54	CT	CCT	8.94262e-06	4.82577e-06	8.77915e-07	1.00807e-06	2.21425e-06	2.14592e-06	1.07471e-06	0	2.50002e-06	2.03301e-06	0	2.86618e-06
55	TA	CTT	2.98087e-06	0	0	0	0	1.07296e-06	0	0	0	1.35534e-06	5.56861e-07	5.73236e-07
55	TC	CTT	0	8.04296e-07	8.77915e-07	0	0	0	0	0	6.25005e-07	6.7767e-07	0	1.14647e-06
55	TG	CTT	0	0	0	3.02421e-06	0	0	1.07471e-06	1.09929e-06	0	0	1.67058e-06	1.14647e-06
56	TA	TTG	2.98087e-06	0	0	0	1.10713e-06	0	0	0	1.25001e-06	0	5.56861e-07	0
56	TC	TTG	0	0	8.77915e-07	0	0	0	0	1.09929e-06	6.25005e-07	6.7767e-07	1.11372e-06	0
56	TG	TTG	0	0	8.77915e-07	0	2.21425e-06	0	1.07471e-06	0	6.25005e-07	0	0	0
57	GA	TGA	2.98087e-06	8.04296e-07	8.77915e-07	1.00807e-06	0	0	0	0	0	1.35534e-06	1.67058e-06	0
57	GC	TGA	2.98087e-06	0	0	0	0	0	0	0	0	0	0	0
57	GT	TGA	0.00027424	4.02148e-06	1.14129e-05	1.00807e-05	4.4285e-06	7.51073e-06	6.44825e-06	3.29787e-06	5.00004e-06	4.06602e-06	3.89803e-06	6.3056e-06
58	AC	GAC	0	0	0	0	0	0	0	0	0	0	0	0
58	AG	GAC	2.98087e-06	0	1.75583e-06	0	0	0	1.07471e-06	0	4.37504e-06	1.35534e-06	1.67058e-06	2.29294e-06
58	AT	GAC	0	0	0	0	0	0	0	0	0	0	0	0
59	CA	ACG	0.000253374	0.000391692	0	0	0	1.07296e-06	0	1.09929e-06	0	0	0	0
59	CG	ACG	0	0	0	0	0	1.28755e-05	0	0	0	6.7767e-07	0	1.49041e-05
59	CT	ACG	9.83689e-05	5.95179e-05	0.00010535	7.15729e-05	6.64275e-05	6.65236e-05	6.44825e-05	6.0461e-05	5.18754e-05	7.72544e-05	6.12547e-05	7.68136e-05
60	GA	CGA	0	2.41289e-06	0	1.00807e-06	2.21425e-06	0	0	1.09929e-06	0	2.03301e-06	5.56861e-07	1.14647e-06
60	GC	CGA	0	0	0	0	0	0	0	0	0	0	0	0
60	GT	CGA	0.000232508	7.23866e-06	2.89712e-05	3.42744e-05	2.21425e-06	6.43777e-06	3.22413e-06	4.39716e-06	6.25005e-06	4.06602e-06	3.34116e-06	8.0253e-06
61	AC	GAT	0	0	0	0	0	0	0	0	0	0	0	0
61	AG	GAT	0	0	0	0	1.10713e-06	1.07296e-06	1.61206e-05	0	6.25005e-07	0	1.39215e-05	5.73236e-07
61	AT	GAT	0	0	0	0	0	0	0	0	6.25005e-07	0	0	0
62	TA	ATA	0	0	0	0	0	0	0	0	0	0	0	0
62	TC	ATA	2.98087e-06	0	8.77915e-07	0	1.10713e-06	0	0	0	6.25005e-07	0	0	5.73236e-07
62	TG	ATA	0	0	0	0	3.32138e-05	8.58369e-06	0	0	1.93752e-05	0	0	1.43309e-05
63	AC	TAC	0	0	5.26749e-06	0	0	0	0	0	0	0	0	0
63	AG	TAC	2.98087e-06	0	0	3.02421e-06	1.10713e-06	1.07296e-06	1.07471e-06	8.79432e-06	3.75003e-06	8.80971e-06	5.56861e-07	5.73236e-07
63	AT	TAC	0	0	0	0	0	2.14592e-06	0	0	0	6.7767e-07	0	0
64	CA	ACA	0	0	0	0	0	0	0	0	0	0	0	0
64	CG	ACA	0	0	0	0	0	5.36481e-06	6.44825e-06	0	0	0	6.12547e-06	0
64	CT	ACA	0	3.21718e-06	0	7.05649e-06	2.21425e-06	5.36481e-06	4.29883e-06	1.09929e-06	6.87506e-06	5.42136e-06	7.23919e-06	2.86618e-06
65	AC	CAG	0	0	8.77915e-07	0	0	5.36481e-06	0	0	0	0	5.56861e-07	0
65	AG	CAG	5.96175e-06	1.60859e-06	8.77915e-07	0	1.43926e-05	1.07296e-06	0	1.75886e-05	2.50002e-06	1.21981e-05	1.67058e-06	2.12097e-05
65	AT	CAG	2.98087e-06	4.02148e-06	0	0	0	0	0	0	4.37504e-06	5.42136e-06	6.68233e-06	3.43942e-06
66	GA	AGC	2.98087e-06	8.04296e-07	0	0	0	0	0	0	6.25005e-07	6.7767e-07	5.56861e-07	0
66	GC	AGC	0	0	8.77915e-07	0	0	0	0	0	0	4.06602e-06	0	0
66	GT	AGC	0.000241451	2.41289e-06	7.02332e-06	1.20968e-05	5.53563e-06	4.29185e-06	7.52296e-06	4.39716e-06	6.87506e-06	2.71068e-06	6.12547e-06	3.43942e-06
67	CA	GCT	0	0	0	1.00807e-06	0	0	0	0	0	0	0	0
67	CG	GCT	0	0	0	0	1.32855e-05	1.07296e-06	7.52296e-06	0	5.62505e-06	0	7.79605e-06	0
67	CT	GCT	0	1.60859e-06	0	1.00807e-06	2.21425e-06	1.07296e-06	0	2.19858e-06	6.25005e-07	6.7767e-07	5.56861e-07	0
68	TA	CTA	0	0	1.75583e-06	0	0	0	0	0	0	6.7767e-07	5.56861e-07	0
68	TC	CTA	0	8.04296e-07	0	1.00807e-06	0	0	2.14942e-06	0	0	6.7767e-07	5.56861e-07	0
68	TG	CTA	0	0	0	0	3.32138e-05	0	0	0	1.00001e-05	2.71068e-06	0	0
69	AC	TAA	0	0	0	0	0	0	0	0	0	0	5.56861e-07	5.73236e-07
69	AG	TAA	0	0	0	1.00807e-06	2.21425e-06	5.36481e-06	1.07471e-06	6.59574e-06	3.12503e-06	2.03301e-06	2.22744e-06	5.73236e-07
69	AT	TAA	2.98087e-06	0	0	0	0	0	0	0	6.25005e-07	6.7767e-07	0	5.73236e-07
70	AC	AAT	0	0	0	0	0	0	0	0	0	0	0	0
70	AG	AAT	0	0	0	1.00807e-06	4.4285e-06	0	1.07471e-06	1.09929e-06	6.25005e-07	1.35534e-06	5.56861e-07	1.14647e-06
70	AT	AAT	0	0	0	0	0	0	0	0	6.25005e-07	0	5.56861e-07	0
71	TA	ATT	0	0	0	0	0	1.07296e-06	0	0	6.25005e-07	0	0	0
71	TC	ATT	8.94262e-06	0	0	0	0	0	0	0	0	0	5.56861e-07	5.73236e-07
71	TG	ATT	0	0	0	0	0	0	3.22413e-06	0	0	0	1.67058e-06	0
72	TA	TTC	0	0	0	0	0	0	0	1.09929e-06	0	0	0	0
72	TC	TTC	2.98087e-06	0	0	1.00807e-06	0	1.07296e-06	0	0	6.25005e-07	6.7767e-07	0	5.73236e-07
72	TG	TTC	0	0	0	0	0	0	0	0	6.25005e-07	0	0	0
73	CA	TCA	2.98087e-06	8.04296e-07	8.77915e-07	0	0	0	0	1.09929e-06	6.25005e-07	0	0	0
73	CG	TCA	1.78852e-05	4.58448e-05	0	0	0	1.60944e-05	0	0	0	0	0	6.3056e-06
73	CT	TCA	1.78852e-05	4.82577e-06	4.38957e-06	1.00807e-06	5.53563e-06	7.51073e-06	6.44825e-06	7.69503e-06	5.00004e-06	7.45437e-06	2.22744e-06	6.3056e-06
74	AC	CAG	0	0	0	0	0	0	0	1.09929e-06	0	0	5.56861e-07	0
74	AG	CAG	0	8.04296e-07	8.77915e-07	0	2.21425e-06	1.07296e-06	0	1.20922e-05	1.87502e-06	1.21981e-05	1.11372e-06	2.86618e-06
74	AT	CAG	0	2.41289e-06	0	0	0	0	0	3.29787e-06	1.00001e-05	6.7767e-06	8.90977e-06	4.58589e-06
75	GA	AGA	0	8.04296e-07	0	5.04035e-06	0	0	1.07471e-06	0	0	6.7767e-07	5.56861e-07	0
75	GC	AGA	5.96175e-06	0	0	0	0	0	0	0	0	0	0	0
75	GT	AGA	0.000214623	4.82577e-06	1.14129e-05	4.03228e-06	6.64275e-06	7.51073e-06	0	2.19858e-06	3.75003e-06	3.38835e-06	5.01175e-06	5.15912e-06
76	AC	GAA	0	0	0	0	0	0	0	0	0	0	0	0
76	AG	GAA	2.98087e-06	2.41289e-06	1.75583e-06	2.01614e-06	2.32496e-05	3.21888e-06	6.44825e-06	5.49645e-06	1.43751e-05	5.42136e-06	4.45489e-06	2.29294e-06
76	AT	GAA	2.98087e-06	8.04296e-06	0	0	1.10713e-06	0	0	0	0	0	0	0
77	AC	AAT	0	0	0	0	0	0	0	0	0	2.71068e-06	0	0
77	AG	AAT	0	0	0	0	2.21425e-06	5.36481e-06	2.14942e-06	1.09929e-06	1.87502e-06	2.03301e-06	3.34116e-06	8.0253e-06
77	AT	AAT	0	8.04296e-07	2.63374e-06	1.00807e-06	0	0	0	0	0	6.7767e-07	0	0
78	TA	ATC	0	0	0	0	0	0	0	0	0	0	0	0
78	TC	ATC	0	0	0	0	0	0	0	0	0	0	0	0
78	TG	ATC	0	0	0	0	0	0	0	0	6.25005e-07	4.06602e-06	0	0
79	CA	TCA	0	0	0	0	0	0	0	0	0	0	0	0
79	CG	TCA	0	0	0	0	0	0	5.37354e-06	0	0	0	2.7843e-06	0
79	CT	TCA	0	1.60859e-06	8.77915e-07	2.01614e-06	1.10713e-06	4.29185e-06	5.37354e-06	3.29787e-06	6.25005e-07	2.71068e-06	2.7843e-06	5.15912e-06
80	AC	CAC	0	0	0	0	0	0	0	0	0	0	0	0
80	AG	CAC	2.98087e-06	8.04296e-07	0	0	3.32138e-06	0	0	0	3.12503e-06	6.7767e-07	2.7843e-06	1.71971e-06
80	AT	CAC	0	8.04296e-07	0	0	0	0	0	0	1.87502e-06	2.03301e-06	2.22744e-06	2.86618e-06
81	CA	ACT	0	0	0	0	0	0	0	0	0	0	0	0
81	CG	ACT	0	0	0	0	0	0	0	0	0	0	5.56861e-07	0
81	CT	ACT	5.96175e-06	2.41289e-06	2.63374e-06	2.01614e-06	0	1.07296e-06	5.37354e-06	1.09929e-06	0	6.7767e-07	1.11372e-06	5.73236e-07
82	TA	CTT	5.96175e-06	0	0	0	0	4.29185e-06	0	0	0	1.35534e-06	0	5.15912e-06
82	TC	CTT	0	0	0	1.00807e-06	0	1.07296e-06	0	0	0	0	1.11372e-06	5.73236e-07
82	TG	CTT	0	0	0	0	0	9.65665e-06	0	0	1.25001e-06	0	5.56861e-07	2.40759e-05
83	TA	TTT	1.78852e-05	3.05632e-05	8.77915e-07	3.22582e-05	0	0	1.07471e-06	1.09929e-06	6.25005e-07	6.7767e-07	5.56861e-07	5.73236e-07
83	TC	TTT	0	8.04296e-07	0	0	0	0	0	1.09929e-06	0	2.03301e-06	5.56861e-07	0
83	TG	TTT	0	0	0	0	0	0	0	1.20922e-05	6.25005e-07	1.15204e-05	0	0
84	TA	TTG	4.7694e-05	9.89284e-05	8.77915e-07	8.97182e-05	1.10713e-06	1.07296e-06	0	0	0	0	1.11372e-06	5.73236e-07
84	TC	TTG	2.98087e-06	8.04296e-07	8.77915e-07	0	0	0	0	2.19858e-06	6.25005e-07	1.35534e-06	1.67058e-06	5.73236e-07
84	TG	TTG	0	0	0	0	0	0	1.28965e-05	0	0	0	8.35291e-06	1.14647e-06
85	GA	TGT	0	8.04296e-07	2.63374e-06	0	2.21425e-06	0	1.07471e-06	1.09929e-06	1.25001e-06	0	0	0
85	GC	TGT	1.78852e-05	2.09117e-05	8.07681e-05	2.11695e-05	0	0	0	1.09929e-06	6.25005e-07	2.71068e-06	0	0
85	GT	TGT	0.000208661	8.04296e-07	2.63374e-06	5.04035e-06	1.10713e-06	3.21888e-06	0	2.19858e-06	6.25005e-06	2.71068e-06	1.11372e-06	1.71971e-06
86	TA	GTG	2.98087e-06	0	8.77915e-07	0	0	0	0	0	0	0	0	0
86	TC	GTG	2.98087e-06	1.60859e-06	0	2.01614e-06	1.10713e-06	1.07296e-06	0	3.29787e-06	0	1.35534e-06	3.89803e-06	5.73236e-07
86	TG	GTG	0	0	0	0	0	0	0	0	6.25005e-07	0	1.11372e-06	1.71971e-06
87	GA	TGG	0	0	0	1.00807e-06	0	1.07296e-06	0	0	6.25005e-07	0	0	5.73236e-07
87	GC	TGG	2.98087e-06	0	0	0	0	0	0	0	0	0	0	0
87	GT	TGG	0.000223566	1.60859e-06	7.90123e-06	3.02421e-06	5.53563e-06	1.07296e-06	2.14942e-06	1.09929e-06	3.75003e-06	1.35534e-06	3.89803e-06	4.01265e-06
88	GA	GGA	2.98087e-06	2.41289e-06	8.77915e-07	0	1.10713e-06	0	0	0	6.25005e-07	0	5.56861e-07	1.14647e-06
88	GC	GGA	2.98087e-06	0	8.77915e-07	0	0	0	0	0	0	0	5.56861e-07	0
88	GT	GGA	0.000214623	7.23866e-06	1.0535e-05	9.07263e-06	2.21425e-06	3.21888e-06	2.14942e-06	5.49645e-06	4.37504e-06	5.42136e-06	3.34116e-06	6.3056e-06
89	AC	GAT	0	0	0	0	0	0	0	0	0	0	0	0
89	AG	GAT	0	8.04296e-07	8.77915e-07	1.00807e-06	2.21425e-06	1.07296e-06	3.22413e-06	4.39716e-06	3.12503e-06	2.03301e-06	3.34116e-06	0
89	AT	GAT	0	0	0	0	0	0	0	0	0	0	0	0
90	TA	ATG	0	0	0	0	0	0	0	0	0	0	0	0
90	TC	ATG	2.98087e-06	0	8.77915e-07	0	0	0	0	1.09929e-06	0	0	1.11372e-06	0
90	TG	ATG	0	0	0	0	1.32855e-05	0	1.07471e-06	1.09929e-06	5.62505e-06	2.71068e-06	3.34116e-06	0
91	GA	TGA	2.98087e-06	2.41289e-06	0	0	0	0	0	0	0	6.7767e-07	0	5.73236e-07
91	GC	TGA	0	0	0	0	0	0	0	0	0	0	0	0
91	GT	TGA	0.00030703	4.82577e-06	1.49245e-05	1.00807e-05	3.32138e-06	8.58369e-06	4.29883e-06	2.19858e-06	6.87506e-06	4.74369e-06	4.45489e-06	8.59854e-06
92	AC	GAG	0	0	0	0	0	0	0	0	0	0	0	0
92	AG	GAG	2.98087e-06	8.04296e-07	8.77915e-07	0	3.32138e-06	1.07296e-06	0	0	2.50002e-06	6.7767e-07	5.56861e-07	1.14647e-06
92	AT	GAG	2.98087e-06	0	0	0	0	2.14592e-06	0	0	6.25005e-07	1.35534e-06	1.11372e-06	5.73236e-07
93	GA	AGT	0	0	0	0	0	0	0	0	0	0	0	0
93	GA	AGT	0	0	0	1.00807e-06	0	0	1.07471e-06	0	0	0	5.56861e-07	5.73236e-07
93	GT	AGT	0.000172891	2.41289e-06	2.63374e-06	1.00807e-06	0	3.21888e-06	2.14942e-06	0	4.37504e-06	1.35534e-06	1.67058e-06	4.58589e-06
94	TA	GTA	0	0	0	0	0	0	0	0	0	0	0	0
94	TC	GTA	8.94262e-06	1.60859e-06	2.63374e-06	2.01614e-06	3.32138e-06	2.14592e-06	1.07471e-06	3.29787e-06	1.87502e-06	2.03301e-06	1.67058e-06	1.14647e-06
94	TG	GTA	0	0	0	0	0	0	0	0	0	0	0	0
95	AC	TAC	0	0	0	0	0	0	0	0	0	0	0	0
95	AG	TAC	0	0	8.77915e-07	1.00807e-06	1.10713e-06	1.07296e-06	0	0	1.25001e-06	2.03301e-06	2.22744e-06	1.14647e-06
95	AT	TAC	0	8.04296e-07	0	0	0	0	0	0	0	0	1.11372e-06	5.73236e-07
96	CA	ACG	0	0	0	0	1.10713e-06	0	0	0	0	0	0	0
96	CG	ACG	0	0	0	0	0	0	0	0	0	0	5.56861e-07	0
96	CT	ACG	0.000146063	5.95179e-05	0.000131687	9.47585e-05	6.75347e-05	6.97425e-05	7.30802e-05	5.71631e-05	7.75006e-05	7.04777e-05	7.35056e-05	8.19728e-05
97	GA	CGA	5.96175e-06	8.04296e-07	1.75583e-06	1.00807e-06	0	0	1.07471e-06	0	6.25005e-07	1.35534e-06	1.11372e-06	1.14647e-06
97	GC	CGA	0	0	0	0	0	0	0	0	0	0	0	0
97	GT	CGA	0.00027424	5.63007e-06	1.0535e-05	6.04842e-06	6.64275e-06	5.36481e-06	7.52296e-06	6.59574e-06	9.37508e-06	1.15204e-05	9.46663e-06	6.87883e-06
98	AC	GAC	0	8.04296e-07	0	0	0	0	0	0	0	0	0	0
98	AG	GAC	0	0	0	1.00807e-06	0	0	0	1.09929e-06	1.25001e-06	0	1.11372e-06	5.73236e-07
98	AT	GAC	0	0	0	0	0	0	0	0	0	0	0	0
99	CA	ACC	2.98087e-06	0	0	0	0	0	0	0	0	0	0	0
99	CG	ACC	0	0	0	0	0	6.43777e-06	0	0	0	0	0	5.73236e-07
99	CT	ACC	2.68279e-05	2.41289e-06	8.77915e-07	3.02421e-06	5.53563e-06	1.07296e-06	4.29883e-06	3.29787e-06	5.00004e-06	4.06602e-06	4.45489e-06	2.29294e-06
100	CA	CCC	0	0	0	0	0	0	0	0	0	0	0	0
100	CG	CCC	0	0	0	0	3.32138e-06	0	0	4.39716e-06	0	2.71068e-06	0	5.73236e-07
100	CT	CCC	1.49044e-05	2.41289e-06	0	5.04035e-06	0	0	6.44825e-06	3.29787e-06	3.75003e-06	6.7767e-06	7.79605e-06	4.58589e-06
101	CA	CCT	0	0	0	2.01614e-06	0	0	1.07471e-06	0	0	0	0	0
101	CG	CCT	0	0	0	0	0	0	5.37354e-06	0	0	0	2.7843e-06	0
101	CT	CCT	0	4.82577e-06	0	1.00807e-06	1.10713e-06	3.21888e-06	0	1.09929e-06	3.12503e-06	2.03301e-06	1.67058e-06	5.73236e-07
102	TA	CTA	0	0	0	0	0	0	0	0	0	6.7767e-07	0	5.73236e-07
102	TC	CTA	5.96175e-06	8.04296e-07	0	0	1.10713e-06	1.07296e-06	1.07471e-06	0	6.25005e-07	6.7767e-07	0	5.73236e-07
102	TG	CTA	0	0	0	0	1.43926e-05	1.07296e-06	0	0	2.50002e-06	0	0	0
103	AC	TAC	0	3.21718e-06	2.80933e-05	4.03228e-06	0	0	0	0	0	0	0	0
103	AG	TAC	0	0	0	0	3.32138e-06	1.07296e-06	0	6.59574e-06	1.87502e-06	2.71068e-06	1.11372e-06	5.73236e-07
103	AT	TAC	0	0	0	0	1.10713e-06	0	0	0	4.37504e-06	0	0	0
104	CA	ACG	0	8.04296e-07	0	1.00807e-06	0	0	1.07471e-06	0	0	0	0	0
104	CG	ACG	0	0	0	0	0	0	3.22413e-06	0	0	0	1.11372e-06	0
104	CT	ACG	0.000163948	5.95179e-05	0.000122908	9.17343e-05	8.08202e-05	6.86695e-05	0.000103172	7.47517e-05	6.68755e-05	6.5734e-05	7.1835e-05	9.40107e-05
105	GA	CGA	0	8.04296e-07	0	4.03228e-06	0	1.07296e-06	3.22413e-06	1.09929e-06	0	0	1.11372e-06	5.73236e-07
105	GC	CGA	2.98087e-06	0	0	0	0	0	0	0	0	0	0	0
105	GT	CGA	0.000280202	8.04296e-06	6.1454e-06	5.04035e-06	3.32138e-06	6.43777e-06	3.22413e-06	6.59574e-06	2.50002e-06	6.7767e-07	7.79605e-06	6.87883e-06
106	AC	GAT	0	0	0	0	0	0	0	0	0	0	0	0
106	AG	GAT	0	0	0	0	0	0	0	0	1.87502e-06	6.7767e-07	0	5.15912e-06
106	AT	GAT	0	0	0	0	0	0	0	0	0	0	0	0
107	TA	ATA	0	0	0	0	0	0	0	0	0	0	0	0
107	TC	ATA	0	0	0	1.00807e-06	0	0	0	1.09929e-06	0	0	0	5.73236e-07
107	TG	ATA	0	0	0	0	0	0	0	0	6.25005e-07	0	0	0
108	AC	TAG	0	0	0	0	0	0	0	0	0	0	0	5.73236e-07
108	AG	TAG	0	0	1.75583e-06	0	0	1.07296e-06	1.07471e-06	0	0	0	1.67058e-06	0
108	AT	TAG	0	0	0	0	0	0	0	0	6.25005e-07	0	0	0
109	GA	AGA	0	2.41289e-06	8.77915e-07	1.00807e-06	0	0	0	0	0	0	5.56861e-07	5.73236e-07
109	GC	AGA	0	0	0	0	0	0	0	0	0	0	0	0
109	GT	AGA	0.000244432	2.41289e-06	1.0535e-05	1.00807e-05	7.74988e-06	1.07296e-06	6.44825e-06	3.29787e-06	6.87506e-06	3.38835e-06	3.89803e-06	7.45207e-06
110	AC	GAG	0	0	0	0	0	0	0	0	0	6.7767e-07	0	0
110	AG	GAG	0	8.04296e-07	0	0	0	2.14592e-06	3.22413e-06	1.09929e-06	1.25001e-06	6.7767e-07	3.89803e-06	5.73236e-07
110	AT	GAG	2.98087e-06	8.04296e-07	0	0	0	0	0	0	0	0	0	0
111	GA	AGG	0	0	0	0	0	0	0	0	6.25005e-07	0	0	1.14647e-06
111	GC	AGG	0	0	0	0	0	0	0	0	0	0	0	0
111	GT	AGG	0.000247413	8.04296e-07	2.63374e-06	1.00807e-06	3.32138e-06	5.36481e-06	3.22413e-06	4.39716e-06	5.00004e-06	2.03301e-06	8.35291e-06	5.15912e-06
111+1	GA	GGT	2.98087e-06	2.41289e-06	0	1.00807e-06	0	0	0	0	0	6.7767e-07	0	0
111+1	GC	GGT	0	0	0	0	0	0	0	0	0	0	0	0
111+1	GT	GGT	0.000229527	0	6.1454e-06	3.02421e-06	0	1.07296e-06	2.14942e-06	2.19858e-06	2.50002e-06	4.74369e-06	3.89803e-06	1.71971e-06
111+2	TA	GTA	0	0	0	0	0	0	0	0	0	0	5.56861e-07	0
111+2	TC	GTA	8.94262e-06	2.41289e-06	1.75583e-06	0	2.21425e-06	0	1.07471e-06	1.09929e-06	6.25005e-07	2.03301e-06	2.22744e-06	0
111+2	TG	GTA	0	0	0	0	7.74988e-06	0	1.28965e-05	0	2.50002e-06	0	1.72627e-05	0
111+3	AC	TAA	0	0	0	0	0	0	0	0	0	0	0	0
111+3	AG	TAA	2.98087e-06	2.41289e-06	8.77915e-07	0	2.87853e-05	1.07296e-05	0	1.09929e-06	1.68751e-05	0	0	3.32477e-05
111+3	AT	TAA	0	0	0	0	0	0	0	0	0	0	0	0
111+4	AC	AAC	0	0	0	0	0	0	0	0	0	6.7767e-07	0	0
111+4	AG	AAC	2.98087e-06	8.04296e-07	0	0	0	0	1.07471e-06	1.42908e-05	6.25005e-07	1.49087e-05	0	0
111+4	AT	AAC	0	0	0	0	0	0	0	0	6.25005e-07	0	0	0
111+5	CA	ACG	0	8.04296e-07	0	1.00807e-06	0	0	0	0	0	0	1.11372e-06	0
111+5	CG	ACG	0	0	0	0	0	1.07296e-06	1.50459e-05	0	0	0	7.79605e-06	6.3056e-06
111+5	CT	ACG	0.00013712	4.9062e-05	0.000156269	9.97989e-05	8.63558e-05	6.54506e-05	8.4902e-05	8.13475e-05	7.81256e-05	7.58991e-05	6.18115e-05	8.82784e-05
111+6	GA	CGC	2.98087e-06	8.04296e-07	8.77915e-07	1.00807e-06	8.857e-06	1.07296e-06	1.07471e-06	0	2.50002e-06	4.06602e-06	0	1.71971e-06
111+6	GC	CGC	0	0	0	0	0	0	1.07471e-06	0	6.25005e-07	0	0	0
111+6	GT	CGC	0.000396456	8.84725e-06	2.19479e-05	8.06456e-06	9.96413e-06	8.58369e-06	1.71953e-05	4.39716e-06	8.12507e-06	6.7767e-06	7.23919e-06	1.03182e-05
111+7	CA	GCT	0	0	0	0	0	0	0	0	0	0	0	0
111+7	CG	GCT	0	0	0	0	0	0	1.07471e-06	0	0	0	1.11372e-06	5.73236e-07
111+7	CT	GCT	2.98087e-06	3.21718e-06	8.77915e-07	1.00807e-06	0	0	0	0	1.25001e-06	2.03301e-06	5.56861e-07	1.14647e-06
111+8	TA	CTG	0	1.60859e-06	0	0	0	0	2.14942e-06	0	1.25001e-06	0	1.67058e-06	0
111+8	TC	CTG	0	3.21718e-06	0	0	4.4285e-06	1.07296e-06	1.07471e-06	2.19858e-06	1.25001e-06	2.71068e-06	5.56861e-07	1.71971e-06
111+8	TG	CTG	0	0	0	0	1.10713e-06	0	1.07471e-06	0	1.87502e-06	0	0	5.73236e-07
111+9	GA	TGC	2.98087e-06	0	0	1.00807e-06	1.10713e-06	0	0	0	1.25001e-06	6.7767e-07	0	5.73236e-07
111+9	GC	TGC	8.94262e-06	0	0	3.02421e-06	0	0	0	1.09929e-06	0	6.7767e-07	0	0
111+9	GT	TGC	0.000295107	3.21718e-06	1.40466e-05	1.00807e-05	5.53563e-06	5.36481e-06	3.22413e-06	4.39716e-06	5.00004e-06	4.06602e-06	6.12547e-06	6.3056e-06
111+10	CA	GCT	0	0	0	1.00807e-06	0	2.14592e-06	1.07471e-06	2.19858e-06	0	0	0	0
111+10	CG	GCT	0	0	0	0	0	1.07296e-06	0	1.09929e-06	0	0	0	0
111+10	CT	GCT	1.78852e-05	4.02148e-06	8.77915e-07	5.04035e-06	5.53563e-06	4.29185e-06	3.22413e-06	1.53901e-05	3.75003e-06	4.74369e-06	2.7843e-06	4.01265e-06
111+11	TA	CTC	2.98087e-06	0	0	0	0	1.07296e-06	0	0	0	6.7767e-07	5.56861e-07	0
111+11	TC	CTC	0	1.60859e-06	8.77915e-07	0	0	2.14592e-06	1.07471e-06	1.09929e-06	0	3.38835e-06	3.34116e-06	5.73236e-07
111+11	TG	CTC	0	0	0	0	0	0	0	0	0	2.03301e-06	2.7843e-06	0
111+12	CA	TCT	2.98087e-06	8.04296e-07	1.75583e-06	1.00807e-06	0	0	0	3.29787e-06	0	0	0	0
111+12	CG	TCT	0	8.04296e-07	0	0	0	0	0	0	0	0	0	0
111+12	CT	TCT	2.98087e-06	2.41289e-06	0	1.00807e-06	0	0	0	1.09929e-06	6.25005e-07	2.03301e-06	5.56861e-07	5.73236e-07
111+13	TA	CTA	0	0	0	0	1.10713e-06	0	0	0	0	0	0	0
111+13	TC	CTA	0	8.04296e-07	0	1.00807e-06	0	0	1.07471e-06	0	6.25005e-07	0	5.56861e-07	5.73236e-07
111+13	TG	CTA	0	0	0	0	0	0	0	0	0	0	0	0
111+14	AC	TAC	0	0	0	0	3.32138e-06	0	0	0	0	0	0	0
111+14	AG	TAC	0	1.60859e-06	0	1.00807e-06	1.10713e-06	1.07296e-06	0	1.09929e-06	3.06252e-05	1.35534e-06	2.7843e-06	1.71971e-06
111+14	AT	TAC	0	0	0	0	0	1.07296e-06	0	0	1.25001e-06	0	5.56861e-07	1.71971e-06
111+15	CA	ACA	0	0	8.77915e-07	0	0	1.07296e-06	0	2.19858e-06	0	0	0	0
111+15	CG	ACA	0	0	0	1.00807e-06	0	0	0	0	6.25005e-07	0	0	0
111+15	CT	ACA	3.27896e-05	4.82577e-06	3.51166e-06	4.03228e-06	1.66069e-05	1.07296e-05	1.07471e-05	7.69503e-06	8.75007e-06	1.28757e-05	1.05804e-05	8.59854e-06
111+16	AC	CAG	2.98087e-06	0	0	0	2.21425e-06	3.21888e-06	0	0	1.25001e-06	0	5.56861e-07	5.73236e-07
111+16	AG	CAG	0	0	0	0	1.10713e-06	0	1.07471e-06	0	6.25005e-07	2.03301e-06	1.11372e-06	1.14647e-06
111+16	AT	CAG	2.98087e-06	1.60859e-06	2.63374e-06	3.02421e-06	0	0	0	0	2.50002e-06	4.06602e-06	3.34116e-06	2.86618e-06
111+17	GA	AGT	0	1.60859e-06	0	2.01614e-06	0	0	0	1.09929e-06	0	0	5.56861e-07	0
111+17	GC	AGT	0	0	0	0	0	0	0	0	6.25005e-07	3.38835e-06	5.56861e-07	6.87883e-06
111+17	GT	AGT	0.000193757	0	3.51166e-06	4.03228e-06	2.21425e-06	0	4.29883e-06	1.09929e-06	2.50002e-06	3.38835e-06	2.22744e-06	2.29294e-06
111+18	TA	GTC	0	0	0	0	0	0	0	0	0	0	5.56861e-07	0
111+18	TC	GTC	2.98087e-06	2.41289e-06	8.77915e-07	1.00807e-06	2.21425e-06	0	2.14942e-06	0	1.25001e-06	6.7767e-07	1.67058e-06	2.29294e-06
111+18	TG	GTC	0	0	0	0	0	0	0	1.09929e-06	0	0	0	0
111+19	CA	TCT	0	8.04296e-07	8.77915e-07	1.00807e-06	0	0	0	0	6.25005e-07	0	0	0
111+19	CG	TCT	0	0	0	0	0	0	0	0	0	0	0	0
111+19	CT	TCT	8.94262e-06	4.82577e-06	0	1.00807e-06	3.32138e-06	3.21888e-06	2.14942e-06	1.09929e-06	4.37504e-06	6.7767e-07	3.34116e-06	1.71971e-06
111+20	TA	CTG	2.98087e-06	0	0	0	0	0	0	0	0	0	5.56861e-07	0
111+20	TC	CTG	2.98087e-06	0	8.77915e-07	0	1.10713e-06	0	1.07471e-06	1.09929e-06	0	0	5.56861e-07	1.71971e-06
111+20	TG	CTG	0	0	0	0	0	0	0	0	0	0	0	0
111+21	GA	TGC	2.98087e-06	0	8.77915e-07	1.00807e-06	1.10713e-06	0	0	0	1.25001e-06	0	0	0
111+21	GC	TGC	0	0	0	0	0	0	0	1.09929e-06	0	0	0	0
111+21	GT	TGC	0.00020568	4.82577e-06	8.77915e-06	1.00807e-06	1.10713e-06	1.07296e-06	1.07471e-06	0	6.25005e-07	2.71068e-06	2.7843e-06	3.43942e-06
111+22	CA	GCG	2.98087e-06	0	0	0	0	0	0	0	0	0	0	0
111+22	CG	GCG	2.98087e-06	8.04296e-07	0	0	1.10713e-06	0	0	0	0	6.7767e-07	0	0
111+22	CT	GCG	0.000241451	6.27351e-05	0.000136077	0.000121976	7.74988e-05	7.18884e-05	8.27525e-05	6.26595e-05	7.93756e-05	8.06428e-05	7.74036e-05	8.2546e-05
111+23	GA	CGT	2.98087e-06	3.21718e-06	8.77915e-07	3.02421e-06	1.10713e-06	0	1.07471e-06	0	1.25001e-06	1.35534e-06	1.67058e-06	5.73236e-07
111+23	GC	CGT	0	0	0	0	0	0	0	0	0	0	1.67058e-06	0
111+23	GT	CGT	0.000214623	2.41289e-06	5.26749e-06	4.03228e-06	5.53563e-06	1.07296e-06	1.07471e-06	1.09929e-06	1.25001e-06	0	9.46663e-06	3.43942e-06
111+24	TA	GTG	0	0	0	0	0	1.07296e-06	0	0	0	0	5.56861e-07	0
111+24	TC	GTG	5.96175e-06	0	8.77915e-07	0	1.10713e-06	1.07296e-06	3.22413e-06	2.19858e-06	0	6.7767e-07	5.56861e-07	5.73236e-07
111+24	TG	GTG	0	0	0	0	0	0	0	0	0	0	0	0
111+25	GA	TGC	0	0	0	2.01614e-06	0	2.14592e-06	0	0	6.25005e-07	0	1.11372e-06	1.14647e-06
111+25	GC	TGC	0	0	0	0	0	0	0	0	1.25001e-06	2.71068e-06	1.67058e-06	5.73236e-07
111+25	GT	TGC	0.000241451	2.41289e-06	3.51166e-06	6.04842e-06	1.10713e-06	2.14592e-06	4.29883e-06	1.09929e-06	2.50002e-06	3.38835e-06	5.01175e-06	2.86618e-06
111+26	CA	GCG	2.98087e-06	8.04296e-07	0	0	1.10713e-05	3.21888e-06	2.14942e-06	5.49645e-06	0	6.7767e-07	0	0
111+26	CG	GCG	0	0	0	0	0	1.07296e-06	0	0	6.25005e-07	0	5.56861e-07	0
111+26	CT	GCG	0.000211642	7.72124e-05	0.000146612	0.000126009	9.41057e-05	6.97425e-05	6.34078e-05	9.56382e-05	8.81257e-05	7.25107e-05	8.0188e-05	9.11445e-05
111+27	GA	CGC	5.96175e-06	8.04296e-07	8.77915e-07	2.01614e-06	1.10713e-06	0	1.07471e-06	0	4.37504e-06	6.09903e-06	4.45489e-06	2.29294e-06
111+27	GC	CGC	0	0	0	0	4.4285e-06	2.14592e-06	2.14942e-06	2.19858e-06	7.50006e-06	1.15204e-05	9.46663e-06	0
111+27	GT	CGC	0.000301068	4.02148e-06	1.14129e-05	1.00807e-05	3.32138e-06	9.65665e-06	5.37354e-06	2.19858e-06	8.75007e-06	2.03301e-06	7.23919e-06	6.87883e-06
111+28	CA	GCT	0	0	8.77915e-07	1.00807e-06	0	1.07296e-06	0	0	0	0	0	0
111+28	CG	GCT	0	0	0	0	0	0	0	0	0	0	5.56861e-07	0
111+28	CT	GCT	2.68279e-05	4.02148e-06	3.51166e-06	3.02421e-06	8.857e-06	1.18026e-05	9.67238e-06	5.49645e-06	7.50006e-06	6.09903e-06	1.11372e-05	4.58589e-06
111+29	TA	CTT	5.96175e-06	0	0	0	3.32138e-06	1.07296e-06	0	0	6.25005e-07	0	1.11372e-06	5.73236e-07
111+29	TC	CTT	2.98087e-06	8.04296e-07	0	0	0	1.07296e-06	1.07471e-06	3.29787e-06	6.25005e-07	1.35534e-06	1.67058e-06	1.14647e-06
111+29	TG	CTT	0	8.04296e-07	0	0	0	0	1.07471e-06	0	0	0	0	0
111+30	TA	TTG	2.98087e-06	0	0	0	0	0	0	0	6.25005e-07	0	0	0
111+30	TC	TTG	2.98087e-06	0	2.63374e-06	0	0	0	0	1.09929e-06	0	0	5.56861e-07	0
111+30	TG	TTG	0	0	8.77915e-07	0	0	0	0	0	0	0	0	0
111+31	GA	TGT	5.96175e-06	8.04296e-07	0	3.02421e-06	0	0	0	0	0	2.03301e-06	5.56861e-07	0
111+31	GC	TGT	2.98087e-06	0	0	0	0	1.07296e-06	0	0	0	0	0	5.73236e-07
111+31	GT	TGT	0.000217604	4.82577e-06	2.63374e-06	0	4.4285e-06	2.14592e-06	1.07471e-06	1.09929e-06	1.25001e-06	2.03301e-06	2.22744e-06	1.71971e-06
111+32	TA	GTA	0	0	0	0	0	0	0	0	0	0	0	0
111+32	TC	GTA	2.98087e-06	1.60859e-06	0	0	2.21425e-06	1.07296e-06	1.07471e-06	2.19858e-06	1.25001e-06	0	0	0
111+32	TG	GTA	0	0	0	0	0	0	0	0	0	0	0	0
111+33	AC	TAA	0	0	0	0	0	0	0	0	6.25005e-07	0	0	0
111+33	AG	TAA	0	8.04296e-07	8.77915e-07	0	3.32138e-06	1.07296e-06	1.07471e-06	2.19858e-06	6.25005e-07	2.03301e-06	1.11372e-06	5.73236e-07
111+33	AT	TAA	0	0	0	0	0	0	0	0	0	6.7767e-07	0	0
111+34	AC	AAA	0	8.04296e-07	0	0	0	0	0	0	0	0	0	0
111+34	AG	AAA	0	1.60859e-06	0	0	1.10713e-06	1.07296e-06	0	1.09929e-06	6.25005e-07	0	0	0
111+34	AT	AAA	0	0	0	0	0	1.07296e-06	0	0	0	0	5.56861e-07	5.73236e-07
111+35	AC	AAG	0	8.04296e-07	0	0	1.10713e-06	0	0	0	0	0	0	0
111+35	AG	AAG	2.98087e-06	0	0	0	1.10713e-06	1.07296e-06	1.07471e-06	0	6.25005e-07	0	5.56861e-07	0
111+35	AT	AAG	0	8.04296e-07	0	0	0	0	0	0	0	6.7767e-07	5.56861e-07	0
111+36	GA	AGG	0	8.04296e-07	0	0	0	1.07296e-06	0	1.09929e-06	6.25005e-07	0	0	1.14647e-06
111+36	GC	AGG	0	0	0	0	0	0	0	0	0	0	0	0
111+36	GT	AGG	0.000235489	4.02148e-06	7.02332e-06	9.07263e-06	3.32138e-06	6.43777e-06	4.29883e-06	3.29787e-06	4.37504e-06	2.71068e-06	6.12547e-06	5.15912e-06
111+37	GA	GGA	0	1.60859e-06	0	0	0	0	0	0	6.25005e-07	0	0	1.14647e-06
111+37	GC	GGA	0	0	0	2.01614e-06	0	1.07296e-06	0	0	0	0	0	0
111+37	GT	GGA	0.000175872	3.21718e-06	1.49245e-05	6.04842e-06	4.4285e-06	6.43777e-06	5.37354e-06	8.79432e-06	5.62505e-06	1.01651e-05	3.89803e-06	4.01265e-06
111+38	AC	GAC	0	8.04296e-07	0	0	0	0	1.07471e-06	1.09929e-06	0	0	0	5.73236e-07
111+38	AG	GAC	2.98087e-06	0	0	0	3.32138e-06	2.14592e-06	2.14942e-06	0	3.12503e-06	6.7767e-07	2.22744e-06	1.71971e-06
111+38	AT	GAC	0	0	0	0	0	0	0	0	0	6.7767e-07	0	0
111+39	CA	ACG	0	0	0	0	0	0	0	0	6.25005e-07	0	0	0
111+39	CG	ACG	0	0	0	0	0	0	0	0	2.50002e-06	2.71068e-06	2.22744e-06	3.43942e-06
111+39	CT	ACG	9.24071e-05	5.22792e-05	0.000119396	0.000101815	7.9713e-05	6.33047e-05	7.84537e-05	7.25531e-05	6.50005e-05	7.92874e-05	6.4039e-05	7.33742e-05
111+40	GA	CGG	0	1.60859e-06	8.77915e-07	0	1.10713e-06	0	1.07471e-06	1.09929e-06	2.50002e-06	3.38835e-06	1.67058e-06	0
111+40	GC	CGG	0	0	0	0	0	0	0	0	1.25001e-06	6.7767e-07	1.11372e-06	0
111+40	GT	CGG	0.00020568	3.21718e-06	7.02332e-06	9.07263e-06	3.32138e-06	2.14592e-06	2.14942e-06	4.39716e-06	3.75003e-06	6.7767e-07	3.34116e-06	4.01265e-06
111+41	GA	GGC	2.98087e-06	3.21718e-06	0	4.03228e-06	4.4285e-06	0	0	3.29787e-06	0	1.35534e-06	0	5.73236e-07
111+41	GC	GGC	0	0	0	0	2.76781e-05	1.28755e-05	1.827e-05	6.59574e-06	6.25005e-07	6.7767e-07	5.56861e-07	0
111+41	GT	GGC	0.000223566	2.41289e-06	7.90123e-06	3.02421e-06	8.857e-06	1.07296e-05	8.59767e-06	4.39716e-06	8.75007e-06	6.7767e-06	6.68233e-06	3.43942e-06
111+42	CA	GCA	0	0	0	0	0	2.14592e-06	2.14942e-06	0	0	6.7767e-07	1.67058e-06	5.73236e-07
111+42	CG	GCA	0	0	0	0	0	0	0	0	0	0	0	0
111+42	CT	GCA	1.49044e-05	3.21718e-06	0	5.04035e-06	7.74988e-06	6.43777e-06	3.22413e-06	7.69503e-06	6.87506e-06	5.42136e-06	6.68233e-06	5.15912e-06

## Sheet: Kras exon 2 129 strain
Mutation frequency of Kras exon 2 in Krasnat/nat or Krasex3op/ex3op mice
Sample name: treatment (UR: urethane)_genotype (nat: Krasnat/nat, ex3op: Krasex3op/ex3op)_mouse ID
Nucleotide	Substitution	Nucleotide context	UR_ex3op_364	UR_nat_363	PBS_ex3op_371	PBS_nat_366	PBS_nat_1	PBS_nat_4	PBS_ex3op_2	PBS_ex3op_3	UR_nat_5	UR_nat_7	UR_ex3op_6	UR_ex3op_8
132	AT	TAG	0	0	0	0	0	0	0	0	0	0	1.30314e-06	0
132	AG	TAG	0	0	4.5488e-06	0	3.89677e-06	2.36797e-06	3.99096e-06	2.29279e-06	1.81261e-06	5.91072e-06	1.30314e-06	2.61386e-06
132	AC	TAG	0	0	0	4.28453e-06	2.59784e-06	1.18398e-06	0	0	0	0	0	0
133	GT	AGT	7.12363e-05	9.80873e-06	0	0	1.29892e-06	2.36797e-06	2.66064e-06	2.29279e-06	5.43782e-06	0	3.90941e-06	1.30693e-06
133	GC	AGT	0	9.80873e-06	0	0	0	1.18398e-06	0	0	0	0	0	0
133	GA	AGT	0	0	0	4.28453e-06	0	0	0	1.14639e-06	0	1.47768e-06	0	0
134	TG	GTA	0	9.80873e-06	0	0	0	1.18398e-06	2.66064e-06	0	0	0	0	0
134	TC	GTA	0	0	0	0	1.29892e-06	0	1.33032e-06	0	0	0	1.30314e-06	1.30693e-06
134	TA	GTA	0	0	0	0	0	1.18398e-06	0	0	1.81261e-06	0	0	0
135	AT	TAA	0	0	0	0	0	0	0	0	0	0	0	0
135	AG	TAA	3.95757e-06	0	0	0	3.89677e-06	2.36797e-06	1.33032e-06	0	1.81261e-06	0	1.30314e-06	0
135	AC	TAA	0	0	0	0	0	0	0	0	0	0	0	0
136	AT	AAT	0	0	0	0	1.29892e-06	0	0	0	0	0	0	0
136	AG	AAT	0	0	0	0	0	1.18398e-06	0	1.14639e-06	1.81261e-06	2.95536e-06	0	0
136	AC	AAT	0	0	0	0	0	0	0	0	0	0	0	0
137	TG	ATT	7.91515e-06	0	1.81952e-05	1.28536e-05	0	0	5.32128e-06	0	5.43782e-06	0	3.90941e-06	0
137	TC	ATT	3.95757e-06	0	0	0	0	0	0	0	0	1.47768e-06	2.60627e-06	0
137	TA	ATT	0	0	0	0	0	0	0	0	0	0	1.30314e-06	0
138	TG	TTG	0	0	4.5488e-06	0	9.09246e-06	4.73594e-06	0	0	5.43782e-05	0	0	3.92079e-06
138	TC	TTG	0	0	0	0	2.59784e-06	1.18398e-06	1.33032e-06	1.14639e-06	0	2.95536e-06	0	2.61386e-06
138	TA	TTG	0	0	0	0	1.29892e-06	1.18398e-06	0	0	3.62521e-06	1.47768e-06	0	0
139	GT	TGA	0.000253285	0	9.09761e-06	0	6.49461e-06	5.91992e-06	2.66064e-06	1.14639e-06	1.26882e-05	4.43304e-06	2.60627e-06	5.22772e-06
139	GC	TGA	0	0	0	0	0	0	0	0	0	0	0	0
139	GA	TGA	0	0	0	0	0	1.18398e-06	0	0	0	4.43304e-06	1.30314e-06	0
140	AT	GAT	0	0	0	0	0	0	0	3.43918e-06	0	0	2.60627e-06	0
140	AG	GAT	0	0	0	0	0	2.36797e-06	1.33032e-06	1.71959e-05	0	3.54643e-05	0	0
140	AC	GAT	0	0	0	0	0	0	0	0	0	0	0	0
141	TG	ATG	0	0	0	0	0	0	7.98192e-06	0	0	0	2.73659e-05	0
141	TC	ATG	0	0	0	0	2.59784e-06	2.36797e-06	0	2.29279e-06	0	1.47768e-06	3.90941e-06	1.30693e-06
141	TA	ATG	0	0	0	0	2.59784e-06	0	0	0	0	0	0	0
142	GT	TGG	0.000332436	0	9.09761e-06	4.28453e-06	0	3.55195e-06	0	2.29279e-06	1.81261e-06	1.47768e-06	0	2.61386e-06
142	GC	TGG	0	0	0	0	0	0	0	0	0	0	0	0
142	GA	TGG	0	0	0	0	0	1.18398e-06	0	0	1.81261e-06	0	1.30314e-06	0
143	GT	GGA	0.000447206	0	1.81952e-05	8.56905e-06	6.49461e-06	5.91992e-06	7.98192e-06	2.29279e-06	0	5.91072e-06	5.21255e-06	5.22772e-06
143	GC	GGA	3.95757e-06	0	0	0	3.89677e-05	0	0	0	0	0	0	0
143	GA	GGA	0	0	0	0	0	0	0	1.14639e-06	1.81261e-06	0	0	0
144	AT	GAG	0	0	0	4.28453e-06	0	0	0	1.14639e-06	0	0	0	1.30693e-06
144	AG	GAG	0	0	4.5488e-06	0	1.29892e-06	1.18398e-06	0	1.14639e-05	1.81261e-06	3.10313e-05	5.21255e-06	1.04554e-05
144	AC	GAG	0	0	0	0	0	0	0	1.14639e-06	0	0	0	0
145	GT	AGA	4.74909e-05	0	1.36464e-05	0	0	3.55195e-06	2.66064e-06	0	0	2.95536e-06	0	2.61386e-06
145	GC	AGA	0	0	0	0	0	0	0	0	0	0	0	0
145	GA	AGA	0	0	0	0	1.29892e-06	0	0	0	0	0	1.30314e-06	0
146	AT	GAA	0.000221624	9.80873e-06	0	0.00032134	1.29892e-06	0	0	0	0	1.47768e-06	0	2.61386e-06
146	AG	GAA	0	0	0	0	2.59784e-05	2.36797e-06	6.6516e-06	1.14639e-06	5.43782e-06	2.95536e-06	0	1.30693e-06
146	AC	GAA	0	0	0	0	0	0	0	0	0	0	0	0
147	AT	AAA	0	0	0	0	0	0	0	0	0	0	0	0
147	AG	AAA	0	0	0	0	1.03914e-05	2.36797e-06	0	1.14639e-06	5.43782e-06	0	1.30314e-06	2.61386e-06
147	AC	AAA	0	0	0	0	0	0	0	0	0	0	0	0
148	AT	AAC	0	0	0	0	0	0	0	1.14639e-06	0	0	0	0
148	AG	AAC	0	0	0	0	0	1.18398e-06	1.33032e-06	8.02476e-06	1.81261e-06	4.43304e-06	3.90941e-06	1.30693e-06
148	AC	AAC	0	0	0	0	0	0	0	0	0	0	0	0
149	CT	ACC	7.91515e-06	0	0	0	7.79353e-06	1.18398e-06	5.32128e-06	5.73197e-06	7.25042e-06	7.38839e-06	6.51569e-06	2.61386e-06
149	CG	ACC	0	0	0	0	0	0	0	0	0.000192136	2.95536e-06	3.90941e-06	0
149	CA	ACC	0	0	0	0	0	0	0	0	0	0	0	0
150	CT	CCT	1.18727e-05	9.80873e-06	0	0	0	4.73594e-06	1.33032e-06	0	0	1.47768e-06	0	1.30693e-06
150	CG	CCT	0	0	0	0	5.19569e-06	0.000134974	2.66064e-06	0	1.81261e-06	0	1.30314e-06	0.000111089
150	CA	CCT	0	9.80873e-06	0	0	0	0	0	0	0	0	1.30314e-06	0
151	TG	CTG	0	0	0	4.28453e-06	1.29892e-06	0	0	0.000115786	2.90017e-05	0.000124125	0	2.61386e-06
151	TC	CTG	0	0	0	0	1.29892e-06	2.36797e-06	1.33032e-06	4.58558e-06	1.81261e-06	2.95536e-06	2.60627e-06	1.30693e-06
151	TA	CTG	0	0	0	0	0	0	0	0	0	0	0	0
152	GT	TGT	0.00011477	0	0	8.56905e-06	1.29892e-06	4.73594e-06	6.6516e-06	5.73197e-06	1.81261e-06	1.47768e-06	2.60627e-06	1.30693e-06
152	GC	TGT	0	0	0	0	0	1.18398e-06	0	0	0	0	0	6.53465e-06
152	GA	TGT	0	0	0	0	0	0	0	0	0	1.47768e-06	0	0
153	TG	GTC	0	0	0	0	0.000170159	1.06559e-05	0	1.94887e-05	0	2.51205e-05	2.60627e-06	1.43762e-05
153	TC	GTC	0	0	0	0	2.59784e-06	1.18398e-06	0	2.29279e-06	1.81261e-06	1.47768e-06	1.30314e-06	0
153	TA	GTC	0	0	0	0	0	0	0	0	0	2.95536e-06	1.30314e-06	0
154	CT	TCT	0	0	0	0	3.89677e-06	0	0	1.03176e-05	0	2.06875e-05	0	1.30693e-06
154	CG	TCT	0	0	0	0	1.29892e-06	0	1.46335e-05	4.58558e-06	7.25042e-06	1.92098e-05	2.60627e-05	0
154	CA	TCT	0	0	0	0	0	0	0	2.29279e-06	1.81261e-06	4.43304e-06	0	0
155	TG	CTC	0	0	0	0	4.15655e-05	3.55195e-06	1.06426e-05	0	0	0	1.17282e-05	6.53465e-06
155	TC	CTC	0	0	0	0	1.29892e-06	1.18398e-06	1.33032e-06	0	0	0	0	0
155	TA	CTC	3.95757e-06	0	0	0	0	0	0	0	1.81261e-06	0	0	0
156	CT	TCT	7.91515e-06	0	4.5488e-06	4.28453e-06	3.89677e-06	2.36797e-06	2.66064e-06	1.14639e-06	3.62521e-06	0	5.21255e-06	1.30693e-06
156	CG	TCT	0	0	0	0	2.72774e-05	0	0	9.17116e-06	1.81261e-06	2.36429e-05	0	0
156	CA	TCT	0	0	0	0	0	0	0	0	0	0	0	0
157	TG	CTT	0	0	0	0	0	1.18398e-06	1.46335e-05	0	0	0	1.30314e-05	6.53465e-06
157	TC	CTT	0	0	0	0	0	0	0	0	0	1.47768e-06	1.30314e-06	0
157	TA	CTT	3.95757e-06	0	0	0	0	1.18398e-06	0	0	0	2.95536e-06	0	0
158	TG	TTG	0	0	0	0	2.33806e-05	0	0	1.14639e-06	0	7.38839e-06	0	0
158	TC	TTG	0	0	0	0	0	0	1.33032e-06	2.29279e-06	1.81261e-06	0	0	1.30693e-06
158	TA	TTG	3.95757e-06	0	0	0	0	0	0	0	0	0	0	0
159	GT	TGG	0.000193921	0.000127513	1.36464e-05	0.000154243	5.19569e-06	1.18398e-06	1.33032e-06	1.14639e-06	5.43782e-06	1.47768e-06	3.90941e-06	1.30693e-06
159	GC	TGG	3.95757e-06	0	0	0	0	0	0	1.14639e-06	0	0	0	0
159	GA	TGG	0	0	0	0	0	1.18398e-06	0	0	1.81261e-06	1.47768e-06	1.30314e-06	1.30693e-06
160	GT	GGA	0.000300776	1.96175e-05	0.000145562	8.56905e-06	3.89677e-06	2.36797e-06	6.6516e-06	0	1.81261e-06	1.47768e-06	6.51569e-06	7.84158e-06
160	GC	GGA	3.95757e-06	0	0	0	0	0	0	0	0	0	0	0
160	GA	GGA	0	0	0	0	0	0	1.33032e-06	1.14639e-06	1.81261e-06	0	0	0
161	AT	GAT	0	0	0	0	1.29892e-06	1.18398e-06	0	0	1.81261e-06	0	1.30314e-06	0
161	AG	GAT	0	0	0	0	1.29892e-06	1.18398e-06	1.33032e-06	0	7.25042e-06	1.47768e-06	1.30314e-06	2.61386e-06
161	AC	GAT	0	0	0	0	0	0	0	0	1.81261e-06	0	0	0
162	TG	ATA	0	0	0	0	0	2.36797e-06	0	0	0	0	0	3.92079e-06
162	TC	ATA	3.95757e-06	0	0	0	0	0	1.33032e-06	1.14639e-06	1.81261e-06	0	0	0
162	TA	ATA	0	0	0	0	0	1.18398e-06	0	0	0	0	0	1.30693e-06
163	AT	TAT	0	0	0	0	0	0	0	0	0	0	0	0
163	AG	TAT	0	9.80873e-06	9.09761e-06	0	0	2.36797e-06	1.33032e-06	2.29279e-06	1.45008e-05	1.47768e-06	1.30314e-06	0
163	AC	TAT	0	0	0	0	0	0	0	0	0	0	0	0
164	TG	ATT	0	0	0	0	0	0.000123134	2.66064e-06	0	0	0	1.30314e-06	0.000133307
164	TC	ATT	0	0	0	0	0	0	0	0	0	0	0	1.30693e-06
164	TA	ATT	0	0	0	0	0	0	0	0	0	1.47768e-06	2.60627e-06	0
165	TG	TTC	0	0	0	0	7.79353e-06	0	0	7.33693e-05	7.25042e-06	8.275e-05	0	0
165	TC	TTC	3.95757e-06	0	4.5488e-06	0	3.89677e-06	1.18398e-06	0	3.43918e-06	5.43782e-06	2.95536e-06	6.51569e-06	3.92079e-06
165	TA	TTC	0	0	0	0	3.89677e-06	0	0	1.14639e-06	0	0	0	0
166	CT	TCT	0	9.80873e-06	4.5488e-06	0	1.29892e-06	1.18398e-06	0	1.14639e-06	0	2.95536e-06	0	0
166	CG	TCT	0	0	0	0	1.29892e-06	4.73594e-06	6.51857e-05	0	0	0	6.51569e-05	3.92079e-06
166	CA	TCT	0	0	0	0	0	0	0	0	0	0	0	0
167	TG	CTC	0	0	0	0	0.000127294	0	0	1.14639e-06	0	2.95536e-06	0	0
167	TC	CTC	0	0	0	4.28453e-06	1.29892e-06	3.55195e-06	0	3.43918e-06	0	2.95536e-06	2.60627e-06	1.30693e-06
167	TA	CTC	0	0	0	0	0	0	0	0	0	0	0	0
168	CT	TCG	0.000150388	4.90436e-05	0.000109171	8.99751e-05	6.23483e-05	6.74871e-05	5.58734e-05	5.96125e-05	6.34412e-05	5.46741e-05	5.08223e-05	7.05742e-05
168	CG	TCG	0	0	0	0	0	0	2.66064e-06	1.14639e-06	3.62521e-06	7.38839e-06	6.51569e-06	1.30693e-06
168	CA	TCG	3.95757e-06	0	0	0	0	0	1.33032e-06	1.14639e-06	0	0	0	0
169	GT	CGA	0.000364097	0	4.5488e-06	8.56905e-06	3.89677e-06	7.1039e-06	5.32128e-06	2.29279e-06	0	2.95536e-06	3.90941e-06	6.53465e-06
169	GC	CGA	3.95757e-06	0	0	0	0	0	0	0	1.81261e-06	0	0	0
169	GA	CGA	3.95757e-06	0	0	0	1.29892e-06	3.55195e-06	0	2.29279e-06	7.25042e-06	0	0	2.61386e-06
170	AT	GAC	0	0	0	0	0	0	0	0	0	1.47768e-06	1.30314e-06	0
170	AG	GAC	0	9.80873e-06	9.09761e-06	0	5.19569e-06	5.91992e-06	0	2.29279e-06	1.08756e-05	8.86607e-06	2.60627e-06	0
170	AC	GAC	3.95757e-06	0	0	0	0	0	0	0	1.81261e-06	0	0	0
171	CT	ACA	1.97879e-05	9.80873e-06	2.2744e-05	0	5.19569e-06	9.47187e-06	3.99096e-06	6.87837e-06	7.25042e-06	7.38839e-06	7.81882e-06	9.14851e-06
171	CG	ACA	0	0	0	0	1.29892e-06	1.18398e-06	3.99096e-06	3.43918e-06	0	5.91072e-06	2.60627e-06	0
171	CA	ACA	3.95757e-06	0	0	0	0	0	0	0	0	0	0	0
172	AT	CAC	0	0	0	0	1.29892e-06	0	2.66064e-06	1.14639e-06	3.62521e-06	1.47768e-06	6.51569e-06	1.30693e-06
172	AG	CAC	0	1.96175e-05	4.5488e-06	0	1.6886e-05	0	2.66064e-06	3.43918e-06	7.25042e-06	1.47768e-06	2.60627e-06	6.53465e-06
172	AC	CAC	0	9.80873e-06	0	0	0	0	0	0	0	0	0	0
173	CT	ACA	3.95757e-06	0	0	4.28453e-06	1.29892e-06	1.06559e-05	6.6516e-06	8.02476e-06	1.08756e-05	1.03438e-05	1.69408e-05	1.04554e-05
173	CG	ACA	0	0	0	0	2.59784e-06	1.18398e-06	0	0	0	0	0	0
173	CA	ACA	0	0	0	0	0	0	0	0	0	0	0	0
174	AT	CAG	7.91515e-06	0	0	0	1.29892e-06	0	0	0	1.08756e-05	4.43304e-06	6.51569e-06	1.30693e-05
174	AG	CAG	0	0	4.5488e-06	0	5.19569e-06	2.36797e-06	5.32128e-06	0	5.43782e-06	0	3.90941e-06	1.30693e-06
174	AC	CAG	0	0	0	0	0	0	0	0	1.81261e-06	2.95536e-06	0	0
175	GT	AGC	0.000498654	0	1.81952e-05	1.71381e-05	7.79353e-06	8.28789e-06	6.6516e-06	4.58558e-06	7.25042e-06	8.86607e-06	7.81882e-06	9.14851e-06
175	GC	AGC	0	0	0	0	0	1.18398e-06	0	0	0	0	1.30314e-06	0
175	GA	AGC	0	0	4.5488e-06	4.28453e-06	1.29892e-06	0	0	0	0	1.47768e-06	1.30314e-06	0
176	CT	GCA	2.7703e-05	0	4.5488e-06	0	1.29892e-06	2.36797e-06	1.33032e-06	5.73197e-06	7.25042e-06	7.38839e-06	1.17282e-05	7.84158e-06
176	CG	GCA	1.58303e-05	2.94262e-05	0	5.56988e-05	0	0	0	5.73197e-06	0	1.32991e-05	0	0
176	CA	GCA	3.95757e-06	0	0	0	0	0	1.33032e-06	1.14639e-06	0	0	0	0
177	AT	CAG	1.18727e-05	0	3.63904e-05	0	1.29892e-06	0	0	0	9.06303e-06	1.18214e-05	1.69408e-05	7.84158e-06
177	AG	CAG	3.95757e-06	9.80873e-06	0	0	3.89677e-06	1.18398e-06	5.32128e-06	2.29279e-06	5.43782e-06	4.43304e-06	6.51569e-06	1.30693e-06
177	AC	CAG	0	0	0	0	0	0	0	0	1.81261e-06	0	0	0
178	GT	AGG	0.000316606	0	1.36464e-05	0	1.29892e-06	3.55195e-06	1.33032e-06	1.14639e-06	1.81261e-06	0	2.60627e-06	2.61386e-06
178	GC	AGG	0	0	0	0	0	0	0	1.14639e-06	1.81261e-06	0	0	0
178	GA	AGG	0	0	9.09761e-06	0	0	0	1.33032e-06	0	1.81261e-06	0	2.60627e-06	0
179	GT	GGT	0.000280988	0	9.09761e-06	0	2.59784e-06	3.55195e-06	2.66064e-06	2.29279e-06	1.81261e-06	0	3.90941e-06	2.61386e-06
179	GC	GGT	0	0	0	0	0	0	0	0	0	0	0	2.61386e-06
179	GA	GGT	0	0	0	0	5.19569e-06	1.18398e-06	0	0	0	0	0	0
180	TG	GTC	0	0	0	0	0	0	1.33032e-06	2.17815e-05	7.25042e-06	3.25089e-05	1.30314e-06	0
180	TC	GTC	0	0	4.5488e-06	4.28453e-06	1.29892e-06	0	1.33032e-06	1.14639e-06	1.81261e-06	1.47768e-06	2.60627e-06	3.92079e-06
180	TA	GTC	0	0	0	0	0	0	0	0	0	1.47768e-06	0	0
181	CT	TCA	3.95757e-06	1.96175e-05	0	0	3.89677e-06	3.55195e-06	3.99096e-06	4.58558e-06	7.25042e-06	1.32991e-05	6.51569e-06	2.61386e-06
181	CG	TCA	0	0	0	0	6.49461e-06	3.55195e-06	3.45883e-05	0	0	0	3.25784e-05	7.84158e-06
181	CA	TCA	0	0	0	0	0	0	0	0	0	1.47768e-06	0	0
182	AT	CAA	0	0	0	0	0	0	1.33032e-06	1.14639e-06	9.06303e-06	1.03438e-05	1.17282e-05	1.43762e-05
182	AG	CAA	3.95757e-06	0	0	0	6.6245e-05	1.18398e-06	5.32128e-06	3.43918e-06	5.43782e-06	1.32991e-05	6.51569e-06	6.53465e-06
182	AC	CAA	0	0	0	0	0	0	0	1.14639e-06	0	0	0	1.30693e-06
183	AT	AAG	0	9.80873e-06	0	0	0	0	1.33032e-06	0	0	0	1.30314e-06	0
183	AG	AAG	0	9.80873e-06	0	0	0	0	7.98192e-06	0	1.81261e-05	0	5.21255e-06	0
183	AC	AAG	0	0	0	0	0	0	0	0	0	0	1.30314e-06	0
184	GT	AGA	0.000229539	9.80873e-06	1.36464e-05	1.28536e-05	9.09246e-06	2.36797e-06	1.33032e-06	3.43918e-06	3.62521e-06	1.47768e-06	3.90941e-06	1.30693e-06
184	GC	AGA	0	0	0	0	0	0	0	0	0	0	0	0
184	GA	AGA	0	0	0	4.28453e-06	0	0	0	1.14639e-06	0	0	0	0
185	AT	GAG	0	0	0	0	0	0	0	0	0	1.47768e-06	0	0
185	AG	GAG	0	0	4.5488e-06	0	0	0	5.32128e-06	9.17116e-06	1.81261e-06	1.03438e-05	1.30314e-06	2.61386e-06
185	AC	GAG	0	0	0	0	0	0	0	0	0	0	0	0
186	GT	AGG	0.00037597	9.80873e-06	1.36464e-05	8.56905e-06	2.59784e-06	5.91992e-06	5.32128e-06	2.29279e-06	9.06303e-06	4.43304e-06	2.60627e-06	1.30693e-06
186	GC	AGG	0	0	0	0	0	0	0	0	0	0	0	0
186	GA	AGG	0	0	0	0	0	1.18398e-06	0	0	0	0	0	0
187	GT	GGA	0.000470951	0	9.09761e-06	4.28453e-06	3.89677e-06	3.55195e-06	7.98192e-06	0	0	5.91072e-06	7.81882e-06	7.84158e-06
187	GC	GGA	0	0	0	0	0	1.18398e-06	0	0	0	0	0	0
187	GA	GGA	3.95757e-06	0	0	0	0	0	1.33032e-06	0	0	0	0	1.30693e-06
188	AT	GAG	0	9.80873e-06	0	0	0	0	0	0	0	0	1.30314e-06	0
188	AG	GAG	0	0	4.5488e-06	0	5.19569e-06	2.36797e-06	1.33032e-06	3.43918e-06	1.81261e-06	1.32991e-05	2.60627e-06	1.30693e-06
188	AC	GAG	0	0	0	0	0	0	0	0	0	0	0	0
189	GT	AGT	0.000340351	1.96175e-05	4.5488e-06	8.56905e-06	1.29892e-06	1.18398e-06	6.6516e-06	2.29279e-06	1.81261e-06	0	3.90941e-06	2.61386e-06
189	GC	AGT	3.95757e-06	0	0	0	0	1.18398e-06	0	0	0	0	0	0
189	GA	AGT	0	0	0	0	0	0	0	0	0	1.47768e-06	1.30314e-06	0
190	TG	GTA	0	0	0	0	1.29892e-05	0	0	0	3.62521e-06	0	1.30314e-06	0
190	TC	GTA	3.95757e-06	0	0	4.28453e-06	2.59784e-06	1.18398e-06	0	0	3.62521e-06	4.43304e-06	0	1.30693e-06
190	TA	GTA	0	0	0	0	0	0	1.33032e-06	0	0	0	0	0
191	AT	TAC	0	0	0	0	0	0	0	0	0	0	0	1.30693e-06
191	AG	TAC	0	0	0	4.28453e-06	9.09246e-06	3.55195e-06	1.33032e-06	1.14639e-06	3.62521e-06	5.91072e-06	1.30314e-06	5.22772e-06
191	AC	TAC	0	0	0	0	0	0	0	0	0	0	0	0
192	CT	ACA	1.97879e-05	0	9.09761e-06	8.56905e-06	6.49461e-06	1.77598e-05	1.33032e-05	1.14639e-05	1.08756e-05	1.47768e-05	9.12196e-06	9.14851e-06
192	CG	ACA	0	0	0	0	0	0	0	3.43918e-06	5.43782e-06	4.43304e-06	0	0
192	CA	ACA	0	0	4.5488e-06	0	0	1.18398e-06	0	2.29279e-06	0	0	0	0
193	AT	CAG	3.95757e-06	0	0	0	0	0	0	0	7.25042e-06	2.95536e-06	1.30314e-05	1.04554e-05
193	AG	CAG	0	9.80873e-06	0	0	3.89677e-06	8.28789e-06	2.66064e-06	1.14639e-06	5.43782e-06	5.91072e-06	5.21255e-06	6.53465e-06
193	AC	CAG	0	0	0	0	0	0	0	0	0	1.47768e-06	0	1.30693e-06
194	GT	AGT	0.000265158	9.80873e-06	0	4.28453e-06	1.29892e-06	1.18398e-06	5.32128e-06	0	3.62521e-06	2.95536e-06	3.90941e-06	7.84158e-06
194	GC	AGT	0	0	0	0	0	0	0	0	0	1.47768e-06	0	0
194	GA	AGT	0	0	0	4.28453e-06	0	0	0	1.14639e-06	0	1.47768e-06	1.30314e-06	0
195	TG	GTG	0	0	0	0	0	0	9.31224e-06	0	0	0	1.30314e-06	0
195	TC	GTG	3.95757e-06	0	0	0	1.29892e-06	3.55195e-06	3.99096e-06	1.14639e-06	1.81261e-06	1.47768e-06	2.60627e-06	2.61386e-06
195	TA	GTG	0	0	0	0	0	0	0	0	0	0	0	2.61386e-06
196	GT	TGC	0.000502612	0	1.36464e-05	2.57072e-05	2.59784e-06	4.73594e-06	5.32128e-06	1.14639e-06	1.63135e-05	1.47768e-06	1.04251e-05	6.53465e-06
196	GC	TGC	0	0	0	0	0	0	0	0	0	0	0	1.30693e-06
196	GA	TGC	0	0	0	0	0	2.36797e-06	0	1.14639e-06	0	1.47768e-06	3.90941e-06	2.61386e-06
197	CT	GCA	1.97879e-05	2.94262e-05	0	4.28453e-06	6.49461e-06	1.06559e-05	7.98192e-06	1.03176e-05	9.06303e-06	5.91072e-06	7.81882e-06	7.84158e-06
197	CG	GCA	0	0	0	0	0	0	0	0	0	0	0	0
197	CA	GCA	0	0	0	0	0	0	2.66064e-06	0	1.81261e-06	1.47768e-06	0	1.30693e-06
198	AT	CAA	3.95757e-06	0	0	0	0	0	0	0	1.81261e-06	1.47768e-06	1.30314e-06	3.92079e-06
198	AG	CAA	0	0	0	0	1.29892e-06	3.55195e-06	2.66064e-06	1.14639e-06	4.16899e-05	1.03438e-05	6.51569e-06	1.30693e-06
198	AC	CAA	0	0	0	0	0	0	0	0	0	1.47768e-06	0	1.30693e-06
199	AT	AAT	0	0	0	0	0	0	0	0	1.81261e-06	1.47768e-06	1.30314e-06	0
199	AG	AAT	0	0	0	0	0	1.65758e-05	0	1.14639e-06	0	0	0	2.35247e-05
199	AC	AAT	0	0	0	0	0	0	0	0	0	0	0	0
200	TG	ATG	0	0	0	0	0	0	0	9.17116e-06	0	4.1375e-05	0	0
200	TC	ATG	0	0	0	0	0	0	0	0	1.81261e-06	0	0	0
200	TA	ATG	0	0	0	0	0	0	0	0	1.81261e-06	2.95536e-06	0	0
201	GT	TGA	0.000411588	0	1.36464e-05	8.56905e-06	2.59784e-06	8.28789e-06	7.98192e-06	2.29279e-06	1.81261e-06	4.43304e-06	7.81882e-06	3.92079e-06
201	GC	TGA	0	0	0	0	0	0	1.33032e-06	0	0	0	0	0
201	GA	TGA	0	0	0	0	2.59784e-06	0	0	0	0	0	0	0
202	AT	GAG	0	0	0	0	0	0	0	0	1.81261e-06	0	0	1.30693e-06
202	AG	GAG	0	0	0	0	3.76687e-05	5.91992e-06	1.33032e-06	1.14639e-06	1.81261e-06	1.47768e-06	0	1.30693e-06
202	AC	GAG	0	0	0	0	0	0	0	0	0	0	0	0
203	GT	AGG	9.10242e-05	0	4.5488e-06	2.14226e-05	0	2.36797e-06	3.99096e-06	1.14639e-06	7.25042e-06	2.95536e-06	2.60627e-06	1.30693e-06
203	GC	AGG	0	0	0	0	0	0	0	0	0	0	0	0
203	GA	AGG	0	0	0	0	0	1.18398e-06	0	0	0	1.47768e-06	1.30314e-06	1.30693e-06
204	GT	GGG	0.0001306	0	1.81952e-05	1.28536e-05	2.59784e-06	2.36797e-06	6.6516e-06	0	3.62521e-06	0	3.90941e-06	1.30693e-06
204	GC	GGG	0	0	0	0	0	0	0	0	0	0	0	0
204	GA	GGG	0	0	0	4.28453e-06	1.29892e-06	0	0	0	0	1.47768e-06	0	0
205	GT	GGA	0.000443248	0	3.63904e-05	8.56905e-06	5.19569e-06	5.91992e-06	1.19729e-05	5.73197e-06	7.25042e-06	4.43304e-06	6.51569e-06	3.92079e-06
205	GC	GGA	7.91515e-06	0	0	0	0	0	0	0	0	0	0	0
205	GA	GGA	0	0	4.5488e-06	0	0	0	0	0	0	0	1.30314e-06	0
206	AT	GAC	0	0	0	0	0	0	0	0	0	0	0	0
206	AG	GAC	0	9.80873e-06	0	4.28453e-06	3.89677e-06	0	9.31224e-06	8.02476e-06	3.62521e-06	1.62545e-05	3.90941e-06	1.30693e-06
206	AC	GAC	0	0	0	0	0	0	0	0	0	0	0	0
207	CT	ACC	1.58303e-05	0	4.5488e-06	4.28453e-06	5.19569e-06	4.73594e-06	9.31224e-06	2.29279e-06	9.06303e-06	7.38839e-06	6.51569e-06	1.30693e-06
207	CG	ACC	0	0	0	0	2.33806e-05	1.18398e-06	1.19729e-05	0	0	0	1.30314e-05	0
207	CA	ACC	0	0	0	0	0	0	1.33032e-06	0	0	0	0	0
208	CT	CCA	4.74909e-05	9.80873e-06	1.36464e-05	0	2.59784e-06	7.1039e-06	1.59638e-05	9.17116e-06	1.45008e-05	2.06875e-05	7.81882e-06	1.43762e-05
208	CG	CCA	0	0	0	0	4.41634e-05	0	1.33032e-06	1.14639e-06	1.81261e-06	7.38839e-06	0	0
208	CA	CCA	0	0	0	0	0	0	0	0	0	0	0	0
209	AT	CAG	0	0	0	0	1.29892e-06	0	0	0	3.62521e-06	1.47768e-05	1.95471e-05	3.92079e-06
209	AG	CAG	0	0	0	0	3.89677e-06	4.73594e-06	5.32128e-06	0	1.81261e-06	7.38839e-06	7.81882e-06	5.22772e-06
209	AC	CAG	0	0	0	0	0	0	0	0	0	1.47768e-06	0	0
210	GT	AGT	0.000328479	0	9.09761e-06	4.28453e-06	3.89677e-06	1.18398e-06	0	0	0	2.95536e-06	1.30314e-06	1.30693e-06
210	GC	AGT	0	0	0	0	0	0	0	0	0	0	0	0
210	GA	AGT	0	0	0	0	0	0	0	1.14639e-06	0	1.47768e-06	0	1.30693e-06
211	TG	GTA	0	0	0	0	0	0	2.66064e-06	0	4.89404e-05	1.47768e-06	0	0
211	TC	GTA	3.95757e-06	0	0	0	0	1.18398e-06	2.66064e-06	2.29279e-06	1.81261e-06	4.43304e-06	2.60627e-06	2.61386e-06
211	TA	GTA	0	0	0	0	0	0	0	0	0	0	0	0
212	AT	TAC	0	0	0	0	0	2.36797e-06	0	0	1.81261e-06	0	0	1.30693e-06
212	AG	TAC	0	0	0	0	9.09246e-06	1.65758e-05	2.66064e-06	2.29279e-06	1.26882e-05	4.43304e-06	2.60627e-06	1.56832e-05
212	AC	TAC	0	0	0	0	0	0	0	0	0	0	0	0
213	CT	ACA	1.58303e-05	1.96175e-05	9.09761e-06	4.28453e-06	7.79353e-06	4.73594e-06	1.06426e-05	6.87837e-06	7.25042e-06	1.47768e-05	1.17282e-05	9.14851e-06
213	CG	ACA	0	0	0	0	0	1.06559e-05	0	8.59796e-05	0	0.000106393	2.60627e-06	2.35247e-05
213	CA	ACA	0	0	0	0	0	0	0	0	0	0	1.30314e-06	3.92079e-06
214	AT	CAT	3.95757e-06	0	0	0	0	0	0	0	1.81261e-06	2.95536e-06	5.21255e-06	0
214	AG	CAT	0	0	0	0	1.29892e-06	1.18398e-06	4.52309e-05	1.71959e-05	5.43782e-06	3.10313e-05	4.82161e-05	3.92079e-06
214	AC	CAT	0	0	0	0	0	0	0	0	0	1.47768e-06	0	0
215	TG	ATG	0	0	0	0	1.94838e-05	1.18398e-06	1.72942e-05	3.43918e-06	0	1.03438e-05	1.69408e-05	3.92079e-06
215	TC	ATG	0	0	0	0	1.29892e-06	0	0	1.14639e-06	0	2.95536e-06	1.30314e-06	1.30693e-06
215	TA	ATG	0	0	0	0	2.59784e-06	0	0	0	1.81261e-06	0	2.60627e-06	1.30693e-06
216	GT	TGA	0.000193921	9.80873e-06	1.36464e-05	1.28536e-05	0	7.1039e-06	9.31224e-06	3.43918e-06	3.62521e-06	5.91072e-06	1.30314e-06	7.84158e-06
216	GC	TGA	3.95757e-06	0	0	0	0	1.18398e-06	0	0	0	0	0	0
216	GA	TGA	0	0	0	0	0	0	0	0	0	0	1.30314e-06	0
217	AT	GAG	0	0	0	0	0	0	0	0	0	0	1.30314e-06	0
217	AG	GAG	0	0	0	0	1.03914e-05	1.18398e-06	0	5.73197e-06	3.62521e-06	5.91072e-06	5.21255e-06	9.14851e-06
217	AC	GAG	0	0	0	0	0	0	0	0	0	0	0	0
218	GT	AGA	0.000118727	9.80873e-06	9.09761e-06	0	5.19569e-06	0	3.99096e-06	1.14639e-06	3.62521e-06	2.95536e-06	2.60627e-06	2.61386e-06
218	GC	AGA	0	0	0	0	0	0	0	0	0	0	0	1.30693e-06
218	GA	AGA	0	0	0	0	1.29892e-06	0	0	0	0	0	0	1.30693e-06
219	AT	GAA	0	0	0	0	0	0	0	0	1.81261e-06	0	0	0
219	AG	GAA	0	0	0	0	2.59784e-06	0	6.6516e-06	1.14639e-06	1.81261e-06	0	2.60627e-06	2.61386e-06
219	AC	GAA	0	0	0	0	0	0	0	0	0	0	0	0
220	AT	AAC	0	0	0	0	1.29892e-06	0	0	0	0	0	0	0
220	AG	AAC	0	0	0	4.28453e-06	1.42881e-05	1.18398e-06	0	1.14639e-06	1.81261e-06	4.43304e-06	1.30314e-06	5.22772e-06
220	AC	AAC	0	0	0	0	0	0	0	0	0	0	0	0
221	CT	ACT	7.91515e-06	0	0	0	5.19569e-06	1.18398e-06	6.6516e-06	2.29279e-06	3.62521e-06	2.95536e-06	1.30314e-06	3.92079e-06
221	CG	ACT	0	0	0	0	0	0	0	1.14639e-06	1.26882e-05	1.47768e-06	0	0
221	CA	ACT	0	9.80873e-06	0	0	0	0	0	0	0	0	0	0
222	TG	CTG	0	0	0	0	0	4.73594e-06	1.33032e-06	0	0	0	1.30314e-06	9.14851e-06
222	TC	CTG	0	0	0	0	3.89677e-06	1.18398e-06	1.33032e-06	0	3.62521e-06	1.47768e-06	0	0
222	TA	CTG	0	0	0	0	0	0	0	0	0	0	0	1.30693e-06
223	GT	TGG	0.000126642	0	9.09761e-06	1.71381e-05	1.29892e-06	0	5.32128e-06	3.43918e-06	3.62521e-06	1.47768e-06	1.30314e-06	2.61386e-06
223	GC	TGG	0	0	4.5488e-06	0	0	0	0	0	1.81261e-06	0	0	0
223	GA	TGG	0	0	0	0	1.29892e-06	0	0	1.14639e-06	1.81261e-06	1.47768e-06	1.30314e-06	0
224	GT	GGG	0.000126642	9.80873e-06	4.5488e-06	2.99917e-05	7.79353e-06	8.28789e-06	2.66064e-06	4.58558e-06	1.81261e-06	1.47768e-06	5.21255e-06	1.30693e-06
224	GC	GGG	0	0	2.2744e-05	8.56905e-06	0	0	0	0	0	0	0	0
224	GA	GGG	0	0	0	0	0	0	0	0	0	1.47768e-06	0	0
225	GT	GGG	6.33212e-05	9.80873e-06	0	0	5.19569e-06	5.91992e-06	3.99096e-06	1.14639e-06	3.62521e-06	1.47768e-06	2.60627e-06	2.61386e-06
225	GC	GGG	3.95757e-06	9.80873e-06	0	0	0	0	0	0	0	0	0	0
225	GA	GGG	3.95757e-06	0	0	0	2.59784e-06	0	0	0	0	2.95536e-06	0	0
226	GT	GGA	0.000193921	9.80873e-06	9.09761e-06	4.28453e-06	1.29892e-06	5.91992e-06	1.33032e-06	2.29279e-06	3.62521e-06	4.43304e-06	6.51569e-06	0
226	GC	GGA	0	0	0	0	0	0	0	0	0	0	0	0
226	GA	GGA	0	0	0	0	0	0	1.33032e-06	1.14639e-06	0	0	1.30314e-06	0
227	AT	GAG	3.95757e-06	0	0	0	0	0	0	0	1.81261e-06	0	0	0
227	AG	GAG	3.95757e-06	9.80873e-06	0	0	0	5.91992e-06	6.6516e-06	2.29279e-06	7.25042e-06	2.95536e-06	6.51569e-06	5.22772e-06
227	AC	GAG	0	0	0	0	0	0	0	0	0	0	0	0
228	GT	AGG	0.000106855	0	9.09761e-06	1.71381e-05	3.89677e-06	0	3.99096e-06	8.02476e-06	3.62521e-06	1.47768e-06	6.51569e-06	2.61386e-06
228	GC	AGG	0	0	0	0	0	0	0	0	0	0	0	0
228	GA	AGG	0	0	0	0	0	1.18398e-06	0	0	0	0	0	0
229	GT	GGG	0.000166218	0	4.5488e-06	4.28453e-06	1.29892e-06	1.18398e-06	3.99096e-06	0	1.81261e-06	4.43304e-06	5.21255e-06	5.22772e-06
229	GC	GGG	0	0	0	0	0	0	0	0	0	0	0	0
229	GA	GGG	0	0	9.09761e-06	4.28453e-06	1.29892e-06	0	0	0	0	0	0	0
230	GT	GGC	0.000431376	9.80873e-06	1.81952e-05	8.56905e-06	1.03914e-05	4.73594e-06	2.66064e-06	2.29279e-06	1.81261e-06	1.47768e-06	3.90941e-06	7.84158e-06
230	GC	GGC	0	0	0	0	1.29892e-06	0	0	0	0	0	0	0
230	GA	GGC	0	0	0	0	0	0	0	0	0	0	0	0
231	CT	GCT	7.91515e-06	0	0	0	1.29892e-06	1.18398e-06	1.33032e-06	2.29279e-06	3.62521e-06	4.43304e-06	1.30314e-06	2.61386e-06
231	CG	GCT	0	0	0	0	7.79353e-06	0	3.99096e-06	4.58558e-06	0	7.38839e-06	1.30314e-06	0
231	CA	GCT	0	0	0	0	0	0	0	0	0	0	0	0
232	TG	CTT	3.95757e-06	0	0	0	1.03914e-05	0	1.33032e-06	0	0	0	6.51569e-06	0
232	TC	CTT	0	0	0	0	1.29892e-06	0	1.33032e-06	1.14639e-06	0	2.95536e-06	1.30314e-06	0
232	TA	CTT	1.58303e-05	0	0	0	0	1.18398e-06	0	0	0	0	0	0
233	TG	TTT	0	0	0	0	3.89677e-06	0	0	0	3.62521e-06	0	0	0
233	TC	TTT	0	0	0	0	1.29892e-06	0	2.66064e-06	1.14639e-06	1.81261e-06	0	0	0
233	TA	TTT	0	0	0	0	1.29892e-06	0	1.33032e-06	0	0	1.47768e-06	0	0
234	TG	TTC	0	0	0	0	0	1.18398e-06	0	0	0	0	0	1.30693e-06
234	TC	TTC	0	9.80873e-06	0	0	1.29892e-06	0	2.66064e-06	0	0	1.47768e-06	0	2.61386e-06
234	TA	TTC	0	0	0	0	0	0	0	0	0	0	0	0
235	CT	TCT	0	0	0	4.28453e-06	1.29892e-06	2.36797e-06	1.33032e-06	1.14639e-06	1.81261e-06	0	1.30314e-06	2.61386e-06
235	CG	TCT	0	0	0	0	3.89677e-06	0	0	1.14639e-06	0	0	0	1.30693e-06
235	CA	TCT	0	0	0	0	0	0	0	0	0	0	0	0
236	TG	CTT	0	0	0	0	0	0	1.33032e-06	0	1.81261e-06	0	1.30314e-06	0
236	TC	CTT	0	0	0	0	2.59784e-06	0	0	0	0	2.95536e-06	0	0
236	TA	CTT	0	0	0	0	0	0	0	0	0	0	0	0
237	TG	TTT	3.95757e-06	0	0	4.28453e-06	1.29892e-06	4.73594e-06	0	0	0	0	0	0
237	TC	TTT	0	0	9.09761e-06	0	1.29892e-06	0	1.33032e-06	1.14639e-06	0	0	1.30314e-06	2.61386e-06
237	TA	TTT	3.95757e-06	0	0	0	0	0	0	0	0	0	0	1.30693e-06
238	TG	TTG	0	0	0	0	0	0	0	4.58558e-06	1.81261e-06	5.91072e-06	0	1.30693e-06
238	TC	TTG	0	0	0	0	2.59784e-06	1.18398e-06	1.33032e-06	1.14639e-06	1.81261e-06	4.43304e-06	1.30314e-06	0
238	TA	TTG	3.95757e-06	0	4.5488e-06	0	0	0	0	1.14639e-06	0	0	1.30314e-06	1.30693e-06
239	GT	TGT	0.000316606	0	0	1.71381e-05	2.59784e-06	2.36797e-06	3.99096e-06	1.14639e-06	5.43782e-06	4.43304e-06	5.21255e-06	2.61386e-06
239	GC	TGT	0	0	0	0	0	2.36797e-06	0	0	0	0	0	1.30693e-06
239	GA	TGT	0	9.80873e-06	0	0	0	1.18398e-06	1.33032e-06	1.14639e-06	0	0	1.30314e-06	0
240	TG	GTG	0	0	0	0	0	0	0	1.14639e-06	0	1.18214e-05	0	0
240	TC	GTG	7.91515e-06	0	0	0	2.59784e-06	0	0	2.29279e-06	1.81261e-06	0	1.30314e-06	2.61386e-06
240	TA	GTG	0	0	0	0	0	0	0	1.14639e-06	0	1.47768e-06	1.30314e-06	0
241	GT	TGT	0.000356182	9.80873e-06	9.09761e-06	4.28453e-06	5.19569e-06	9.47187e-06	6.6516e-06	5.73197e-06	1.81261e-06	7.38839e-06	3.90941e-06	2.61386e-06
241	GC	TGT	0	0	0	0	0	0	0	1.14639e-06	0	0	1.30314e-06	0
241	GA	TGT	0	0	0	0	0	1.18398e-06	0	0	0	1.47768e-06	0	0
242	TG	GTA	0	0	0	0	1.42881e-05	1.53918e-05	0	0	0	0	0	2.35247e-05
242	TC	GTA	3.95757e-06	0	0	0	1.29892e-06	0	1.33032e-06	0	0	2.95536e-06	2.60627e-06	2.61386e-06
242	TA	GTA	0	0	0	0	0	0	0	1.14639e-06	0	1.47768e-06	1.30314e-06	0
243	AT	TAT	0	0	0	0	0	0	0	0	1.81261e-06	0	0	0
243	AG	TAT	0	0	0	0	3.89677e-06	1.18398e-06	1.33032e-06	3.43918e-06	1.81261e-06	1.47768e-05	1.30314e-06	2.61386e-06
243	AC	TAT	7.91515e-06	9.80873e-06	4.09392e-05	2.14226e-05	0	0	0	0	0	0	0	0
244	TG	ATT	0	0	0	0	0	0	3.99096e-06	1.14639e-06	1.81261e-06	1.47768e-06	7.81882e-06	0
244	TC	ATT	7.91515e-06	0	0	0	2.59784e-06	2.36797e-06	1.33032e-06	0	0	0	0	2.61386e-06
244	TA	ATT	0	0	0	0	1.29892e-06	0	1.33032e-06	0	0	0	1.30314e-06	0
245	TG	TTT	0	0	0	0	2.59784e-06	2.36797e-06	0	1.14639e-06	0	0	0	1.30693e-06
245	TC	TTT	0	0	0	0	2.59784e-06	0	1.33032e-06	1.14639e-06	1.81261e-06	1.47768e-06	0	0
245	TA	TTT	0	0	0	0	1.29892e-06	0	0	0	0	0	0	0
246	TG	TTG	0	0	0	0	1.29892e-06	1.18398e-06	0	3.43918e-06	0	8.86607e-06	0	2.61386e-06
246	TC	TTG	0	9.80873e-06	0	0	9.09246e-06	1.18398e-06	6.6516e-06	5.73197e-06	0	4.43304e-06	1.30314e-06	5.22772e-06
246	TA	TTG	0	0	0	0	0	1.18398e-06	0	0	0	0	0	0

## Sheet: Kras exon 1 mixed strain
Mutation frequency of Kras exon 1 in SftpcCreER/CreER;Trp53fl/fl;Krasnat/nat or SftpcCreER/CreER;Trp53fl/fl;Krasex3op/ex3op mice
Sample name: treatment (UR: urethane)_genotype (nat: SftpcCreER/CreER;Trp53fl/fl;Krasnat/nat, ex3op: SftpcCreER/CreER;Trp53fl/fl;Krasex3op/ex3op)_tamoxifen_mouse ID
Nucleotide: “-” indicates nucleotides upstream of ATG start codon in 5’UTR, “111+” indicates nucleotides in the intron downstream of exon 1
Nucleotide	Substitution	Nucleotide context	UR_ex3op_No Tam_237	UR_ex3op_No Tam_255	UR_ex3op_No Tam_265	UR_nat_No Tam_222	UR_nat_No Tam_225	UR_nat_No Tam_268	UR_ex3op_Tam_243	UR_ex3op_Tam_252	UR_ex3op_Tam_258	UR_nat_Tam_283	UR_nat_Tam_285	UR_nat_Tam_321	PBS_ex3op_No Tam_246	PBS_ex3op_No Tam_247	PBS_ex3op_No Tam_248	PBS_nat_No Tam_273	PBS_nat_No Tam_291	PBS_nat_No Tam_331	PBS_ex3op_Tam_241	PBS_ex3op_Tam_242	PBS_ex3op_Tam_254	PBS_nat_Tam_284	PBS_nat_Tam_288	PBS_nat_Tam_311
-2	AC	AAA	0	0	0	0	0	0	0	1.7287e-06	0	0	0	1.88746e-06	0	0	0	0	0	9.88842e-07	0	0	0	0	0	0
-2	AG	AAA	0	0	0	0	0	1.018e-06	0	0	0	0	0	0	0	3.39307e-06	6.01204e-06	0	3.71856e-06	1.97768e-06	0	1.40993e-06	0	4.09156e-06	0	1.36751e-06
-2	AT	AAA	0	0	0	0	0	0	0	0	1.43553e-06	0	0	0	0	0	0	1.36846e-06	0	0	0	0	0	0	0	0
-1	AC	AAA	0	0	0	0	0	0	0	0	0	0	0	0	0	0	0	0	0	0	0	0	0	0	0	0
-1	AG	AAA	0	0	1.66438e-06	1.24294e-06	0	0	0	1.7287e-06	0	1.56946e-06	0	0	0	3.39307e-06	0	0	0	0	0	0	1.74044e-06	1.36385e-06	0	1.36751e-06
-1	AT	AAA	0	0	1.66438e-06	0	0	0	0	0	0	0	0	0	0	0	0	0	0	0	0	0	0	0	0	0
1	AC	AAT	0	0	0	0	0	0	0	0	0	0	0	0	0	0	0	0	0	0	0	0	0	0	0	0
1	AG	AAT	1.79515e-06	1.16509e-06	1.66438e-06	1.24294e-06	0	0	1.4376e-06	5.18609e-06	2.87106e-06	1.56946e-06	0	0	2.68697e-06	0	0	0	3.71856e-06	0	2.51577e-06	1.40993e-06	1.74044e-06	2.72771e-06	0	0
1	AT	AAT	0	0	0	0	0	0	0	0	0	0	0	0	0	0	0	0	0	0	0	0	0	0	0	0
2	TA	ATG	0	0	0	0	4.82234e-06	0	0	0	0	0	0	0	0	0	0	0	0	0	2.51577e-06	0	0	1.36385e-06	0	0
2	TC	ATG	0	0	0	0	0	1.018e-06	0	0	1.43553e-06	0	0	0	0	0	0	0	3.71856e-06	0	0	0	0	1.36385e-06	0	1.36751e-06
2	TG	ATG	0	0	0	0	0	0	0	0	0	0	0	0	0	0	0	0	3.71856e-06	0	0	0	0	0	0	0
3	GA	TGA	0	0	0	0	0	0	0	1.7287e-06	0	0	3.61216e-06	9.43728e-07	0	0	0	2.73691e-06	0	1.97768e-06	0	1.40993e-06	0	1.36385e-06	0	0
3	GC	TGA	0	0	0	0	0	1.018e-06	0	0	0	0	1.80608e-06	0	0	0	0	0	0	0	0	0	0	0	2.71393e-06	0
3	GT	TGA	1.79515e-06	1.16509e-05	6.65751e-06	4.97177e-06	4.82234e-06	6.108e-06	4.3128e-06	5.18609e-06	8.61319e-06	1.41252e-05	2.16729e-05	2.83118e-06	4.03045e-06	3.39307e-06	6.01204e-06	1.36846e-05	1.48743e-05	0	2.51577e-06	5.63973e-06	1.74044e-05	6.81927e-06	5.42785e-06	4.78628e-05
4	AC	GAC	0	1.16509e-06	3.32876e-06	0	0	0	0	1.7287e-06	0	0	0	0	0	0	0	0	0	0	0	0	0	0	0	0
4	AG	GAC	0	0	3.32876e-06	1.24294e-06	0	0	0	0	0	0	0	9.43728e-07	1.34348e-06	0	0	2.73691e-06	0	9.88842e-07	0	0	0	0	2.71393e-06	1.36751e-06
4	AT	GAC	0	0	0	0	0	0	0	0	0	0	0	9.43728e-07	0	0	0	0	0	0	0	0	0	0	0	0
5	CA	ACT	0	0	0	0	4.82234e-06	0	0	0	0	0	0	0	0	0	0	0	0	0	0	0	0	0	0	0
5	CG	ACT	0	0	0	0	0	0	0	0	0	0	0	0	0	0	0	0	0	0	0	0	0	0	0	0
5	CT	ACT	0	3.49526e-06	0	0	0	0	1.4376e-06	1.7287e-06	1.43553e-06	1.56946e-06	1.80608e-06	9.43728e-07	2.68697e-06	0	0	1.36846e-06	0	4.94421e-06	0	1.40993e-06	3.48088e-06	1.36385e-06	0	0
6	TA	CTG	0	0	0	0	0	0	0	0	0	1.56946e-06	0	0	0	0	0	0	0	0	0	0	3.48088e-06	0	0	0
6	TC	CTG	1.79515e-06	1.16509e-06	0	0	0	2.036e-06	0	1.7287e-06	1.43553e-06	1.56946e-06	0	0	0	3.39307e-06	6.01204e-06	1.36846e-06	0	9.88842e-07	0	0	0	2.72771e-06	0	2.73502e-06
6	TG	CTG	0	0	0	0	0	0	0	0	0	0	0	0	0	0	0	0	0	0	0	0	0	0	0	0
7	GA	TGA	0	0	0	0	0	0	0	0	1.43553e-06	0	0	1.88746e-06	1.34348e-06	0	0	1.36846e-06	3.71856e-06	0	0	0	1.74044e-06	2.72771e-06	0	1.36751e-06
7	GC	TGA	0	0	0	0	0	0	0	0	1.43553e-06	0	0	0	0	0	0	0	0	9.88842e-07	0	0	0	0	0	0
7	GT	TGA	8.97574e-06	3.49526e-06	8.32189e-06	3.72883e-06	9.64469e-06	5.09e-06	2.8752e-06	1.38296e-05	1.72264e-05	3.45282e-05	2.3479e-05	7.54983e-06	4.03045e-06	1.35723e-05	0	6.84228e-06	1.11557e-05	0	7.5473e-06	2.81986e-06	3.48088e-06	1.09108e-05	5.42785e-06	4.37603e-05
8	AC	GAG	0	0	0	0	0	0	0	0	0	0	0	0	0	0	0	0	0	0	0	0	0	0	0	0
8	AG	GAG	0	0	0	1.24294e-06	4.82234e-06	1.018e-06	1.4376e-06	3.45739e-06	1.43553e-06	0	1.80608e-06	0	0	0	0	1.36846e-06	0	0	2.51577e-06	0	0	0	0	0
8	AT	GAG	0	0	0	1.24294e-06	0	0	0	1.7287e-06	0	0	0	9.43728e-07	0	0	0	0	0	0	0	0	0	0	0	0
9	GA	AGT	1.79515e-06	1.16509e-06	0	0	4.82234e-06	1.018e-06	0	0	4.3066e-06	0	0	9.43728e-07	2.68697e-06	0	0	0	0	0	0	0	0	1.36385e-06	0	1.36751e-06
9	GC	AGT	0	0	0	0	0	0	0	0	1.43553e-06	0	0	0	0	0	0	0	0	0	0	0	0	0	0	0
9	GT	AGT	1.79515e-06	1.16509e-06	0	0	4.82234e-06	3.054e-06	0	1.7287e-06	2.87106e-06	6.27785e-06	3.61216e-06	2.83118e-06	1.34348e-06	1.01792e-05	0	2.73691e-06	0	0	2.51577e-06	1.40993e-06	0	4.09156e-06	2.71393e-06	1.77776e-05
10	TA	GTA	0	0	0	0	0	0	0	1.7287e-06	0	0	0	9.43728e-07	0	0	0	0	0	0	0	0	0	0	0	1.36751e-06
10	TC	GTA	1.79515e-06	0	0	0	0	1.018e-06	0	1.7287e-06	0	0	1.80608e-06	0	1.34348e-06	3.39307e-06	0	0	0	0	0	0	0	1.36385e-06	2.71393e-06	0
10	TG	GTA	0	0	0	0	0	0	0	0	0	0	0	1.88746e-06	0	0	0	0	0	0	0	0	0	0	0	0
11	AC	TAT	0	0	0	0	0	0	0	1.7287e-06	0	0	0	0	0	0	0	0	0	9.88842e-07	0	1.40993e-06	0	0	0	1.36751e-06
11	AG	TAT	1.79515e-06	0	0	0	0	1.018e-06	0	0	1.43553e-06	0	0	0	1.34348e-06	0	6.01204e-06	0	0	9.88842e-07	0	0	1.74044e-06	0	0	0
11	AT	TAT	0	0	0	1.24294e-06	0	0	0	0	0	0	0	9.43728e-07	0	0	0	0	0	0	0	0	0	1.36385e-06	0	0
12	TA	ATA	0	0	0	0	0	0	0	0	0	0	1.80608e-06	0	0	0	0	0	0	0	0	1.40993e-06	0	0	0	0
12	TC	ATA	0	0	0	0	0	0	1.4376e-06	0	0	0	0	0	0	0	0	0	0	0	0	0	0	1.36385e-06	0	0
12	TG	ATA	0	0	0	0	0	0	0	0	0	0	1.80608e-06	0	0	0	0	0	0	0	0	1.40993e-06	0	0	0	0
13	AC	TAA	0	0	0	0	0	0	0	0	0	0	0	0	0	0	0	0	0	0	0	0	0	0	0	0
13	AG	TAA	1.79515e-06	2.33017e-06	0	2.48589e-06	0	1.018e-06	0	0	2.87106e-06	1.56946e-06	0	9.43728e-07	0	0	0	1.36846e-06	0	0	0	0	1.74044e-06	0	0	0
13	AT	TAA	0	0	0	0	0	0	0	0	0	0	0	0	0	0	0	0	0	0	0	0	0	0	0	0
14	AC	AAA	0	0	0	0	4.82234e-06	0	0	0	0	0	0	0	0	0	0	0	0	0	2.51577e-06	0	0	0	0	0
14	AG	AAA	0	0	0	0	4.82234e-06	0	1.4376e-06	0	0	0	3.61216e-06	0	0	1.01792e-05	0	0	0	0	0	0	1.74044e-06	0	0	0
14	AT	AAA	0	0	0	0	9.64469e-06	0	1.4376e-06	0	0	0	0	0	0	0	0	0	0	0	0	0	0	0	0	0
15	AC	AAC	0	0	0	2.48589e-06	0	0	0	0	0	1.56946e-06	0	0	0	0	0	0	0	9.88842e-07	0	0	0	0	0	0
15	AG	AAC	0	1.16509e-06	0	0	0	0	0	1.7287e-06	0	0	0	0	0	0	0	0	0	0	5.03154e-06	1.40993e-06	0	0	0	0
15	AT	AAC	0	1.16509e-06	0	0	0	0	0	0	0	1.56946e-06	0	0	0	0	0	0	0	0	0	1.40993e-06	0	0	0	0
16	CA	ACT	1.79515e-06	0	0	0	0	0	0	0	2.87106e-06	0	0	9.43728e-07	0	6.78615e-06	0	1.36846e-06	0	9.88842e-07	0	0	0	0	5.42785e-06	0
16	CG	ACT	0	0	0	0	0	0	0	0	0	0	0	0	0	0	0	0	0	9.88842e-07	0	0	0	0	0	0
16	CT	ACT	0	2.33017e-06	0	0	0	0	0	3.45739e-06	0	3.13892e-06	0	0	2.68697e-06	3.39307e-06	0	0	0	1.97768e-06	2.51577e-06	0	1.74044e-06	1.36385e-06	2.71393e-06	5.47003e-06
17	TA	CTT	3.5903e-06	0	0	0	0	1.018e-06	0	0	0	0	0	0	6.71741e-06	0	1.20241e-05	1.36846e-06	0	3.95537e-06	0	0	0	2.72771e-06	2.71393e-06	0
17	TC	CTT	1.79515e-06	0	0	1.24294e-06	0	0	0	1.7287e-06	0	3.13892e-06	0	0	0	0	0	0	0	0	0	0	0	1.36385e-06	0	1.36751e-06
17	TG	CTT	0	0	0	0	0	0	0	0	0	1.56946e-06	1.80608e-06	0	0	0	0	2.73691e-06	0	9.88842e-07	0	0	0	1.36385e-06	0	0
18	TA	TTG	3.5903e-06	0	0	1.24294e-06	0	0	0	0	0	0	0	0	0	0	6.01204e-06	0	0	0	0	0	0	2.72771e-06	0	0
18	TC	TTG	1.79515e-06	0	0	0	0	1.018e-06	1.4376e-06	1.7287e-06	0	0	3.61216e-06	9.43728e-07	2.68697e-06	3.39307e-06	0	1.36846e-06	3.71856e-06	0	5.03154e-06	4.2298e-06	0	0	0	0
18	TG	TTG	0	0	0	0	4.82234e-06	0	1.4376e-06	0	0	0	0	0	0	0	0	0	0	0	0	0	0	1.36385e-06	2.71393e-06	0
19	GA	TGT	1.79515e-06	1.16509e-06	0	1.24294e-06	0	0	0	0	2.87106e-06	1.56946e-06	0	0	1.34348e-06	1.35723e-05	0	0	0	1.97768e-06	0	0	0	1.36385e-06	0	0
19	GC	TGT	0	0	0	0	0	0	0	0	0	1.56946e-06	0	0	0	0	0	0	3.71856e-06	0	0	0	0	0	0	0
19	GT	TGT	1.79515e-06	0	1.66438e-06	1.24294e-06	0	0	0	1.7287e-06	2.87106e-06	4.70839e-06	5.41823e-06	0	2.68697e-06	0	6.01204e-06	0	0	0	0	0	3.48088e-06	1.36385e-05	0	1.23076e-05
20	TA	GTG	0	0	1.66438e-06	0	0	0	1.4376e-06	3.45739e-06	0	0	0	0	1.34348e-06	0	0	0	0	0	0	0	0	0	0	0
20	TC	GTG	1.79515e-06	0	0	1.24294e-06	0	0	0	1.7287e-06	1.43553e-06	0	1.80608e-06	9.43728e-07	2.68697e-06	0	0	1.36846e-06	3.71856e-06	9.88842e-07	0	1.40993e-06	3.48088e-06	1.36385e-06	2.71393e-06	1.36751e-06
20	TG	GTG	0	0	0	0	0	0	0	0	0	0	0	9.43728e-07	0	0	0	0	0	0	0	0	0	0	0	0
21	GA	TGG	0	0	0	0	0	1.018e-06	0	0	1.43553e-06	1.56946e-06	0	9.43728e-07	0	3.39307e-06	0	1.36846e-06	0	0	2.51577e-06	0	1.74044e-06	0	0	1.36751e-06
21	GC	TGG	0	0	0	0	0	0	0	0	0	0	0	0	0	0	0	0	0	0	0	0	0	0	2.71393e-06	0
21	GT	TGG	1.79515e-06	0	1.66438e-06	1.24294e-06	0	2.036e-06	2.8752e-06	5.18609e-06	5.74213e-06	2.82503e-05	1.62547e-05	9.43728e-07	5.37393e-06	3.39307e-06	0	2.73691e-06	3.71856e-06	0	5.03154e-06	4.2298e-06	1.74044e-06	2.59132e-05	8.14178e-06	3.28202e-05
22	GA	GGT	0	2.33017e-06	1.66438e-06	0	0	0	0	0	0	0	1.80608e-06	0	1.34348e-06	0	0	0	0	0	0	0	0	0	0	0
22	GC	GGT	0	0	0	0	0	0	0	0	0	0	0	0	0	0	0	0	0	0	0	0	0	0	0	0
22	GT	GGT	0	0	0	1.24294e-06	4.82234e-06	1.018e-06	1.4376e-06	0	1.43553e-06	4.70839e-06	3.61216e-06	9.43728e-07	0	0	0	1.36846e-06	3.71856e-06	9.88842e-07	0	0	0	4.09156e-06	2.71393e-06	9.57256e-06
23	TA	GTG	0	0	0	0	0	0	0	0	0	0	0	0	0	0	0	0	0	0	0	0	0	1.36385e-06	0	0
23	TC	GTG	0	1.16509e-06	1.66438e-06	1.24294e-06	0	1.018e-06	0	1.7287e-06	0	0	0	9.43728e-07	2.68697e-06	0	0	0	0	9.88842e-07	2.51577e-06	0	0	1.36385e-06	0	0
23	TG	GTG	1.79515e-06	0	1.66438e-06	0	9.64469e-06	1.018e-06	0	1.7287e-06	1.43553e-06	0	1.80608e-06	0	2.68697e-06	0	0	1.36846e-06	0	9.88842e-07	2.51577e-06	1.40993e-06	1.74044e-06	1.36385e-06	0	0
24	GA	TGG	0	1.16509e-06	1.66438e-06	1.24294e-06	0	2.036e-06	0	5.18609e-06	0	1.56946e-06	0	9.43728e-07	0	3.39307e-06	0	1.36846e-06	0	0	0	1.40993e-06	0	0	0	0
24	GC	TGG	0	0	0	0	0	0	0	0	0	0	0	0	1.34348e-06	0	0	0	0	9.88842e-07	0	0	1.74044e-06	0	0	0
24	GT	TGG	1.79515e-06	4.66034e-06	3.32876e-06	3.72883e-06	4.82234e-06	5.09e-06	4.3128e-06	6.91478e-06	1.72264e-05	2.66809e-05	1.62547e-05	2.83118e-06	4.03045e-06	3.39307e-06	0	5.47382e-06	3.71856e-06	3.95537e-06	5.03154e-06	1.40993e-06	5.22132e-06	1.09108e-05	2.71393e-06	3.00852e-05
25	GA	GGT	0	0	1.66438e-06	0	0	1.018e-06	0	1.7287e-06	0	3.13892e-06	1.80608e-06	0	0	0	0	0	0	9.88842e-07	0	0	1.74044e-06	0	0	0
25	GC	GGT	0	0	0	0	0	0	0	0	0	1.56946e-06	0	0	0	0	0	0	0	0	0	1.40993e-06	0	0	0	0
25	GT	GGT	3.5903e-06	1.16509e-06	3.32876e-06	2.48589e-06	0.000231473	5.09e-06	7.04424e-05	0.000103722	7.17766e-06	1.09862e-05	0.000117395	9.43728e-07	1.34348e-06	6.78615e-06	0	0	7.43713e-06	9.88842e-07	0.000249061	0.000104335	3.48088e-06	6.81927e-06	2.71393e-06	2.46151e-05
26	TA	GTT	0	0	0	0	0	0	0	0	1.43553e-06	0	1.80608e-06	0	0	0	0	1.36846e-06	0	9.88842e-07	0	0	0	0	2.71393e-06	0
26	TC	GTT	1.79515e-06	0	0	0	0	1.018e-06	0	0	0	1.56946e-06	0	9.43728e-07	2.68697e-06	0	0	0	0	0	0	0	1.74044e-06	0	0	1.36751e-06
26	TG	GTT	0	0	0	0	4.82234e-06	0	0	0	0	0	0	0	0	0	0	0	0	0	5.03154e-06	1.40993e-06	0	0	0	0
27	TA	TTG	0	1.16509e-06	1.66438e-06	0	0	1.018e-06	5.7504e-06	3.45739e-06	0	0	5.41823e-06	9.43728e-07	0	0	0	0	0	9.88842e-07	7.5473e-06	0	0	2.72771e-06	0	0
27	TC	TTG	1.79515e-06	2.33017e-06	3.32876e-06	0	0	2.036e-06	0	0	1.43553e-06	1.56946e-06	0	0	2.68697e-06	0	0	2.73691e-06	0	0	2.51577e-06	0	3.48088e-06	2.72771e-06	0	1.36751e-06
27	TG	TTG	0	0	1.66438e-06	1.24294e-06	0	0	0	0	0	0	0	0	0	0	0	0	7.43713e-06	1.97768e-06	0	0	0	0	0	0
28	GA	TGG	0	0	0	0	0	0	1.4376e-06	0	0	4.70839e-06	1.80608e-06	0	0	0	6.01204e-06	0	0	9.88842e-07	0	1.40993e-06	0	0	0	0
28	GC	TGG	0	0	0	0	0	0	0	0	0	0	0	0	1.34348e-06	0	0	0	0	0	0	0	0	0	0	0
28	GT	TGG	6.28302e-05	0	1.66438e-06	1.24294e-06	0	5.09e-06	5.7504e-06	8.64348e-06	1.43553e-06	2.35419e-05	1.08365e-05	3.77491e-06	6.85176e-05	0	2.40481e-05	0	3.71856e-06	9.88842e-07	2.51577e-06	2.81986e-06	5.22132e-06	3.27325e-05	2.71393e-06	4.10252e-05
29	GA	GGA	0	0	0	0	4.82234e-06	0	0	1.7287e-06	2.87106e-06	1.56946e-06	1.80608e-06	0	0	3.39307e-06	0	0	0	0	0	0	0	0	0	0
29	GC	GGA	0	0	0	0	0	0	0	0	0	0	0	0	0	0	0	0	0	0	0	0	0	0	0	0
29	GT	GGA	3.5903e-06	1.16509e-06	0	1.24294e-06	0	2.036e-06	1.4376e-06	6.91478e-06	5.74213e-06	2.51114e-05	3.25094e-05	4.71864e-06	5.37393e-06	3.39307e-06	1.20241e-05	2.73691e-06	7.43713e-06	2.96653e-06	5.03154e-06	7.04966e-06	6.96176e-06	1.09108e-05	1.08557e-05	3.14527e-05
30	AC	GAG	0	0	0	0	0	0	0	0	0	0	0	0	0	0	0	0	0	0	0	0	0	0	0	0
30	AG	GAG	0	0	1.66438e-06	0	0	1.018e-06	0	1.7287e-06	1.43553e-06	1.56946e-06	0	0	0	3.39307e-06	0	1.36846e-06	0	0	0	1.40993e-06	0	1.36385e-06	0	1.36751e-06
30	AT	GAG	0	0	0	0	0	0	0	0	0	0	0	0	0	0	0	0	0	0	0	0	0	1.36385e-06	0	0
31	GA	AGC	0	1.16509e-06	0	0	0	0	0	0	0	3.13892e-06	0	0	0	0	0	1.36846e-06	3.71856e-06	0	0	0	1.74044e-06	0	2.71393e-06	0
31	GC	AGC	0	0	0	0	0	0	0	0	0	0	0	0	1.34348e-06	0	0	0	0	0	0	0	0	0	0	0
31	GT	AGC	1.61563e-05	2.33017e-06	4.99313e-06	2.48589e-06	4.82234e-06	1.1198e-05	1.4376e-06	1.55583e-05	1.00487e-05	5.65006e-05	3.79276e-05	2.83118e-06	9.40438e-06	3.39307e-06	1.20241e-05	1.23161e-05	7.43713e-06	2.96653e-06	1.00631e-05	2.81986e-06	1.74044e-05	1.36385e-05	2.98532e-05	5.33328e-05
32	CA	GCT	1.79515e-06	0	0	1.24294e-06	0	0	1.4376e-06	1.7287e-06	0	1.56946e-06	0	0	0	0	0	0	0	9.88842e-07	5.03154e-06	0	1.74044e-06	1.36385e-06	0	0
32	CG	GCT	0	0	0	0	0	0	0	0	0	0	0	0	0	0	0	0	0	0	0	0	0	0	0	0
32	CT	GCT	5.38545e-06	2.33017e-06	3.32876e-06	1.24294e-06	0	3.054e-06	2.8752e-06	6.91478e-06	1.43553e-06	9.41677e-06	7.22431e-06	4.71864e-06	1.34348e-06	0	1.20241e-05	4.10537e-06	3.71856e-06	1.97768e-06	1.00631e-05	1.40993e-06	1.21831e-05	5.45542e-06	5.42785e-06	6.83754e-06
33	TA	CTG	0	0	0	0	0	0	0	0	0	3.13892e-06	0	9.43728e-07	0	0	0	0	0	0	2.51577e-06	0	0	0	0	0
33	TC	CTG	0	0	1.66438e-06	0	0	1.018e-06	0	0	0	1.56946e-06	3.61216e-06	9.43728e-07	1.34348e-06	3.39307e-06	0	0	0	3.95537e-06	0	1.40993e-06	0	0	0	0
33	TG	CTG	0	0	0	0	0	0	0	0	0	0	0	0	0	0	0	0	0	0	0	0	0	1.36385e-06	0	0
34	GA	TGG	0	1.16509e-06	0	0	9.64469e-06	0	0	1.7287e-06	0	0	3.61216e-06	4.71864e-06	0	0	0	2.73691e-06	0	9.88842e-07	0	1.40993e-06	0	4.09156e-06	0	0
34	GC	TGG	0	0	0	0	0	0	0	0	0	0	0	0	0	1.35723e-05	0	0	0	0	0	0	0	1.36385e-06	0	0
34	GT	TGG	3.5903e-06	2.33017e-06	1.66438e-06	2.48589e-06	4.82234e-06	3.054e-06	1.4376e-06	1.03722e-05	1.29198e-05	2.98198e-05	1.08365e-05	1.88746e-06	6.71741e-06	0	6.01204e-06	1.36846e-06	0	1.97768e-06	5.03154e-06	2.81986e-06	5.22132e-06	1.63663e-05	0	2.32476e-05
35	GA	GGT	0	2.33017e-06	0	0	9.64469e-06	0	1.4376e-06	1.7287e-06	1.43553e-06	3.13892e-06	0	9.43728e-07	0	3.39307e-06	0	0	0	0	2.51577e-06	2.81986e-06	0	0	0	0
35	GC	GGT	0	0	0	0	0	0	0	0	0	0	0	0	0	0	0	0	0	0	0	0	0	0	0	0
35	GT	GGT	1.79515e-06	3.49526e-06	4.99313e-06	6.21472e-06	0	3.054e-06	0	8.64348e-06	8.61319e-06	1.41252e-05	9.03039e-06	2.83118e-06	2.68697e-06	0	0	1.36846e-06	0	1.97768e-06	0	0	8.70221e-06	6.81927e-06	0	2.32476e-05
36	TA	GTG	0	0	0	0	0	0	0	0	1.43553e-06	1.56946e-06	0	1.88746e-06	0	0	0	0	0	0	2.51577e-06	0	0	0	0	0
36	TC	GTG	1.79515e-06	0	0	2.48589e-06	4.82234e-06	2.036e-06	0	0	1.43553e-06	0	5.41823e-06	9.43728e-07	1.34348e-06	3.39307e-06	0	4.10537e-06	0	9.88842e-07	7.5473e-06	0	0	4.09156e-06	0	2.73502e-06
36	TG	GTG	0	0	0	0	0	0	0	0	0	0	0	0	0	0	0	0	0	0	0	0	0	0	0	0
37	GA	TGG	0	0	0	0	0	2.036e-06	0	3.45739e-06	1.43553e-06	0	0	9.43728e-07	2.68697e-06	3.39307e-06	0	0	0	9.88842e-07	0	1.40993e-06	0	0	0	0
37	GC	TGG	0	0	1.66438e-06	0	0	0	0	0	0	1.56946e-06	0	0	0	3.39307e-06	0	0	3.71856e-06	0	0	0	0	0	0	1.36751e-06
37	GT	TGG	1.79515e-06	3.49526e-06	1.66438e-06	3.72883e-06	4.82234e-06	3.054e-06	4.3128e-06	6.91478e-06	1.14843e-05	3.13892e-05	1.62547e-05	1.88746e-06	0	3.39307e-06	0	8.21073e-06	1.48743e-05	3.95537e-06	5.03154e-06	1.40993e-06	6.96176e-06	6.81927e-06	5.42785e-06	3.82902e-05
38	GA	GGC	0	0	1.66438e-06	0	0	2.036e-06	1.4376e-06	0	1.43553e-06	0	0	0	4.03045e-06	0	0	1.36846e-06	0	0	0	0	0	0	2.71393e-06	0
38	GC	GGC	0	0	0	0	0	0	0	0	0	0	0	0	0	0	0	0	0	9.88842e-07	0	0	0	0	0	0
38	GT	GGC	1.79515e-06	5.82543e-06	0	1.24294e-06	0	5.09e-06	2.8752e-06	5.18609e-06	7.17766e-06	1.72641e-05	7.22431e-06	4.71864e-06	5.37393e-06	6.78615e-06	0	2.73691e-06	7.43713e-06	9.88842e-07	5.03154e-06	0	1.04426e-05	8.18313e-06	8.14178e-06	3.69227e-05
39	CA	GCG	1.79515e-06	1.16509e-06	1.66438e-06	0	0	0	0	0	1.43553e-06	0	0	0	0	0	0	0	0	9.88842e-07	0	0	1.74044e-06	1.36385e-06	0	0
39	CG	GCG	0	0	0	0	0	0	0	0	0	0	0	0	1.34348e-06	0	0	0	0	0	0	0	0	0	0	0
39	CT	GCG	0.00012566	9.90323e-05	0.000131486	9.81925e-05	0.000159137	0.00012725	5.0316e-05	0.000100264	0.000101923	0.000106723	9.3916e-05	0.000101923	0.000124944	0.000111971	0.000168337	6.70543e-05	0.000126431	6.13082e-05	0.000118241	9.30555e-05	0.000114869	0.0001132	8.41317e-05	0.000120341
40	GA	CGT	1.79515e-06	0	0	1.24294e-06	0	0	1.4376e-06	3.45739e-06	0	3.13892e-06	1.80608e-06	0	1.34348e-06	0	1.20241e-05	1.36846e-06	3.71856e-06	3.95537e-06	0	2.81986e-06	1.74044e-06	1.36385e-06	5.42785e-06	0
40	GC	CGT	0	0	0	0	0	1.018e-06	0	0	0	0	0	0	0	0	0	0	0	0	0	0	0	0	0	0
40	GT	CGT	0	2.33017e-06	1.66438e-06	3.72883e-06	4.82234e-06	5.09e-06	1.4376e-06	1.21009e-05	1.29198e-05	1.72641e-05	7.22431e-06	1.88746e-06	2.68697e-06	6.78615e-06	0	1.36846e-06	3.71856e-06	1.97768e-06	7.5473e-06	2.81986e-06	1.04426e-05	8.18313e-06	5.42785e-06	3.69227e-05
41	TA	GTA	0	0	0	0	0	0	0	0	0	0	0	0	0	0	0	0	0	0	0	0	0	1.36385e-06	0	0
41	TC	GTA	0	2.33017e-06	0	0	0	0	1.4376e-06	0	0	0	1.80608e-06	2.83118e-06	0	0	0	0	0	9.88842e-07	0	0	0	4.09156e-06	0	1.36751e-06
41	TG	GTA	0	0	0	0	0	0	0	0	0	0	0	0	0	0	0	0	0	0	0	0	0	0	0	0
42	AC	TAG	0	0	0	0	0	0	0	0	0	0	0	0	0	0	0	0	0	0	0	0	0	0	0	0
42	AG	TAG	1.79515e-06	1.16509e-06	0	0	4.82234e-06	0	1.4376e-06	0	1.43553e-06	1.56946e-06	1.80608e-06	0	1.34348e-06	0	0	0	0	0	2.51577e-06	0	1.74044e-06	2.72771e-06	0	1.36751e-06
42	AT	TAG	0	0	0	0	0	0	0	0	0	0	0	0	1.34348e-06	0	0	0	0	0	0	1.40993e-06	0	0	0	0
43	GA	AGG	0	1.16509e-06	1.66438e-06	2.48589e-06	0	1.018e-06	0	0	0	1.56946e-06	0	9.43728e-07	0	0	0	0	0	0	2.51577e-06	0	0	1.36385e-06	2.71393e-06	0
43	GC	AGG	0	1.16509e-06	0	0	0	0	1.4376e-06	0	0	0	0	0	0	0	0	0	0	0	0	0	0	0	0	0
43	GT	AGG	1.79515e-06	5.82543e-06	1.66438e-06	2.48589e-06	0	2.036e-06	2.8752e-06	3.45739e-06	2.00974e-05	2.35419e-05	9.03039e-06	4.71864e-06	8.0609e-06	6.78615e-06	6.01204e-06	9.57919e-06	1.85928e-05	1.97768e-06	1.00631e-05	4.2298e-06	3.48088e-06	9.54698e-06	2.71393e-06	2.73502e-05
44	GA	GGC	0	1.16509e-06	0	0	0	2.036e-06	0	0	0	1.56946e-06	0	0	1.34348e-06	0	0	0	3.71856e-06	0	2.51577e-06	2.81986e-06	0	1.36385e-06	0	1.36751e-06
44	GC	GGC	0	1.16509e-06	0	1.24294e-06	0	0	0	0	0	0	0	0	0	0	0	0	0	0	0	0	0	0	0	0
44	GT	GGC	7.18059e-06	2.33017e-06	1.66438e-06	4.97177e-06	4.82234e-06	5.09e-06	2.8752e-06	2.2473e-05	1.57908e-05	2.82503e-05	4.15398e-05	3.77491e-06	6.71741e-06	0	6.01204e-06	4.10537e-06	1.11557e-05	2.27434e-05	1.25788e-05	0	1.21831e-05	1.9094e-05	8.14178e-06	6.29054e-05
45	CA	GCA	0	0	1.99725e-05	2.48589e-05	5.30458e-05	1.018e-06	0	0	0	4.70839e-06	0	0	0	0	1.20241e-05	0	3.71856e-06	0	2.51577e-06	0	0	0	0	0
45	CG	GCA	0	0	7.4897e-05	0.00014791	0.00770611	0	0	0	0	3.45282e-05	0	0	0	0	0.000138277	0	0	0	0	0	0	0	0	0
45	CT	GCA	0	4.66034e-06	4.99313e-06	0	0	4.072e-06	1.4376e-06	6.91478e-06	1.43553e-06	7.84731e-06	5.41823e-06	0	2.68697e-06	6.78615e-06	6.01204e-06	4.10537e-06	3.71856e-06	9.88842e-07	5.03154e-06	1.40993e-06	1.04426e-05	4.09156e-06	5.42785e-06	4.10252e-06
46	AC	CAA	0	0	0	0	0	0	0	0	0	0	0	9.43728e-07	0	0	0	0	0	0	0	0	0	0	0	0
46	AG	CAA	1.79515e-06	2.33017e-06	0	3.72883e-06	4.82234e-06	2.036e-06	0	1.7287e-06	4.3066e-06	4.70839e-06	3.61216e-06	1.88746e-06	5.37393e-06	3.39307e-06	1.20241e-05	2.73691e-06	7.43713e-06	0	2.51577e-06	1.40993e-06	3.48088e-06	0	0	1.36751e-06
46	AT	CAA	2.51321e-05	8.1556e-06	1.66438e-06	1.24294e-06	9.64469e-06	6.3116e-05	7.76304e-05	1.7287e-06	0	1.56946e-06	0	3.49179e-05	1.34348e-06	9.50061e-05	0	0.000164215	0.000118994	0	6.28942e-05	4.2298e-05	3.48088e-06	0	0.000149266	0
47	AC	AAG	0	0	0	0	0	0	0	0	0	0	0	0	0	0	0	0	0	0	0	0	0	0	0	0
47	AG	AAG	1.79515e-06	1.16509e-06	0	0	0	0	0	3.45739e-06	0	0	0	0	0	0	6.01204e-06	2.73691e-06	3.71856e-06	9.88842e-07	0	1.40993e-06	1.74044e-06	1.36385e-06	0	0
47	AT	AAG	0	0	0	0	0	0	0	5.18609e-06	0	0	1.08365e-05	0	0	0	0	0	0	9.88842e-07	0	0	0	0	0	2.73502e-06
48	GA	AGA	0	1.16509e-06	0	0	0	1.018e-06	0	0	1.43553e-06	1.56946e-06	0	0	0	0	0	0	0	0	2.51577e-06	0	0	2.72771e-06	2.71393e-06	0
48	GC	AGA	0	1.16509e-06	0	0	0	0	0	0	0	0	0	0	0	0	0	0	0	0	0	0	0	0	0	0
48	GT	AGA	5.38545e-06	3.49526e-06	0	3.72883e-06	0	1.018e-06	2.8752e-06	1.7287e-06	2.87106e-06	2.66809e-05	1.44486e-05	2.83118e-06	2.68697e-06	0	1.20241e-05	1.09476e-05	1.48743e-05	0	0	8.45959e-06	6.96176e-06	8.18313e-06	2.44253e-05	3.28202e-05
49	AC	GAG	0	0	0	0	0	0	0	0	0	0	0	0	0	0	0	0	0	0	0	0	0	0	0	0
49	AG	GAG	0	0	0	0	0	0	4.3128e-06	0	2.87106e-06	0	0	0	0	3.39307e-06	6.01204e-06	2.73691e-06	0	0	2.51577e-06	0	0	2.72771e-06	0	0
49	AT	GAG	0	0	0	0	0	0	0	1.7287e-06	0	0	0	0	0	0	0	0	3.71856e-06	0	0	0	0	0	0	0
50	GA	AGC	0	0	0	0	4.82234e-06	1.018e-06	0	0	0	0	1.80608e-06	0	1.34348e-06	0	0	1.36846e-06	0	9.88842e-07	0	0	1.74044e-06	0	0	1.36751e-06
50	GC	AGC	0	0	0	0	0	0	0	0	0	0	0	0	0	0	0	0	0	0	0	0	0	0	0	0
50	GT	AGC	3.5903e-06	1.16509e-06	0	0	0	2.036e-06	1.4376e-06	0	2.87106e-06	1.72641e-05	5.41823e-06	1.88746e-06	1.34348e-06	3.39307e-06	1.80361e-05	1.36846e-06	0	0	2.51577e-06	1.40993e-06	1.74044e-06	2.72771e-06	5.42785e-06	2.05126e-05
51	CA	GCG	0	0	1.66438e-06	1.24294e-06	0	0	0	0	0	1.56946e-06	0	0	1.34348e-06	0	0	0	3.71856e-06	9.88842e-07	0	0	0	0	0	0
51	CG	GCG	0	0	0	0	0	0	1.4376e-06	0	0	0	0	0	0	0	0	0	0	0	0	0	0	0	0	0
51	CT	GCG	0.000150792	0.000116509	0.000138143	9.44637e-05	0.000231473	0.000125214	7.61928e-05	0.000146939	0.00014786	0.000131835	0.000115589	0.000125516	0.000147783	0.000159474	7.81565e-05	0.000104003	0.000118994	8.20739e-05	0.000183651	0.000109975	0.000146197	0.000117291	7.05621e-05	0.000136751
52	GA	CGC	1.79515e-06	1.16509e-06	1.66438e-06	1.24294e-06	9.64469e-06	0	1.4376e-06	1.7287e-06	0	1.56946e-06	1.80608e-06	1.88746e-06	2.68697e-06	0	6.01204e-06	1.36846e-06	0	0	2.51577e-06	2.81986e-06	1.74044e-06	0	2.71393e-06	1.36751e-06
52	GC	CGC	0	1.16509e-06	0	0	0	0	0	0	0	0	0	9.43728e-07	0	0	0	0	0	0	0	0	0	0	0	0
52	GT	CGC	3.5903e-06	1.04858e-05	6.65751e-06	4.97177e-06	9.64469e-06	1.6288e-05	1.4376e-06	1.90156e-05	1.57908e-05	5.65006e-05	3.43155e-05	4.71864e-06	6.71741e-06	1.01792e-05	6.01204e-06	1.36846e-05	2.97485e-05	2.96653e-06	7.5473e-06	8.45959e-06	2.26257e-05	2.59132e-05	1.08557e-05	8.3418e-05
53	CA	GCC	1.79515e-06	0	0	0	0	0	0	5.18609e-06	5.74213e-06	0	1.26425e-05	0	0	0	0	0	0	7.91074e-06	0	1.40993e-06	0	8.18313e-06	0	9.57256e-06
53	CG	GCC	0	0	0	0	0	0	0	0	0	0	0	0	0	0	0	0	0	0	0	0	0	0	0	0
53	CT	GCC	3.5903e-06	4.66034e-06	3.32876e-06	0	0	2.036e-06	5.7504e-06	1.7287e-06	0	6.27785e-06	3.61216e-06	3.77491e-06	2.68697e-06	6.78615e-06	0	5.47382e-06	3.71856e-06	9.88842e-07	2.51577e-06	0	8.70221e-06	2.72771e-06	8.14178e-06	8.20505e-06
54	CA	CCT	0	0	0	0	0	0	0	0	0	0	1.80608e-06	0	0	0	0	0	0	9.88842e-07	0	0	0	1.36385e-06	0	0
54	CG	CCT	0	0	0	0	0	0	0	1.7287e-06	0	0	0	0	0	0	0	0	0	0	0	0	0	0	0	0
54	CT	CCT	0	1.16509e-06	1.66438e-06	2.48589e-06	0	2.036e-06	0	0	0	3.13892e-06	1.80608e-06	9.43728e-07	4.03045e-06	3.39307e-06	1.20241e-05	0	0	0	0	1.40993e-06	3.48088e-06	0	2.71393e-06	2.73502e-06
55	TA	CTT	0	0	0	0	0	0	1.4376e-06	0	0	0	0	0	0	0	0	0	0	0	0	1.40993e-06	0	0	0	1.36751e-06
55	TC	CTT	0	0	0	0	0	0	0	0	0	1.56946e-06	0	0	0	0	0	0	0	0	0	1.40993e-06	0	1.36385e-06	2.71393e-06	0
55	TG	CTT	0	0	0	0	0	0	0	0	0	0	0	0	0	0	0	0	0	0	0	0	0	0	0	0
56	TA	TTG	0	0	0	0	0	0	0	0	0	0	0	0	0	0	6.01204e-06	0	0	0	0	0	0	0	0	0
56	TC	TTG	0	1.16509e-06	0	0	0	0	0	0	0	0	0	0	0	0	0	1.36846e-06	0	0	0	0	1.74044e-06	1.36385e-06	2.71393e-06	1.36751e-06
56	TG	TTG	0	0	0	0	0	0	0	0	0	0	0	0	1.34348e-06	0	0	0	0	0	0	0	0	0	2.71393e-06	0
57	GA	TGA	1.79515e-06	0	0	0	0	0	0	1.7287e-06	0	0	1.80608e-06	0	0	0	0	0	0	9.88842e-07	2.51577e-06	1.40993e-06	1.74044e-06	2.72771e-06	0	0
57	GC	TGA	0	0	0	0	0	0	0	0	0	0	0	0	0	0	0	0	0	0	0	0	0	0	0	0
57	GT	TGA	3.5903e-06	2.33017e-06	0	1.24294e-06	0	6.108e-06	2.8752e-06	5.18609e-06	1.00487e-05	3.13892e-05	2.16729e-05	1.88746e-06	1.34348e-06	6.78615e-06	1.20241e-05	2.73691e-06	7.43713e-06	9.88842e-07	5.03154e-06	2.81986e-06	8.70221e-06	1.22747e-05	0	3.14527e-05
58	AC	GAC	0	0	0	0	0	0	0	0	0	0	0	0	0	0	0	0	0	0	0	0	0	0	0	0
58	AG	GAC	0	0	0	0	0	0	1.4376e-06	0	0	1.56946e-06	0	9.43728e-07	2.68697e-06	0	6.01204e-06	2.73691e-06	3.71856e-06	0	2.51577e-06	0	0	2.72771e-06	2.71393e-06	0
58	AT	GAC	0	0	0	0	0	0	0	0	0	0	0	0	0	0	0	0	0	0	0	0	0	0	0	0
59	CA	ACG	0.000226189	1.51461e-05	0	0	0	2.9522e-05	2.01264e-05	0	0	1.56946e-06	1.80608e-06	1.32122e-05	1.34348e-06	6.44684e-05	0	5.88436e-05	5.9497e-05	0	2.76734e-05	1.40993e-05	1.74044e-06	0	4.34228e-05	0
59	CG	ACG	0	0	0	0	4.82234e-06	0	0	0	0	0	0	0	0	0	0	0	0	0	0	0	0	0	0	0
59	CT	ACG	9.15526e-05	0.000102528	0.000108185	7.95484e-05	0.000159137	0.000103836	6.18168e-05	0.00011928	9.47451e-05	7.69036e-05	8.66917e-05	8.87105e-05	0.00011957	7.80407e-05	0.000126253	9.57919e-05	0.000126431	5.14198e-05	0.00011321	6.76767e-05	8.52816e-05	9.00144e-05	7.3276e-05	7.65805e-05
60	GA	CGA	3.5903e-06	0	0	1.24294e-06	4.82234e-06	0	0	1.7287e-06	1.43553e-06	0	0	0	1.34348e-06	3.39307e-06	0	1.36846e-06	0	0	0	0	0	0	0	0
60	GC	CGA	0	0	0	0	0	0	0	0	0	0	0	0	0	0	0	0	0	0	0	0	0	0	0	0
60	GT	CGA	7.18059e-06	4.66034e-06	3.32876e-06	1.24294e-06	0	3.054e-06	4.3128e-06	3.45739e-06	2.58396e-05	2.35419e-05	2.16729e-05	4.71864e-06	8.0609e-06	6.78615e-06	6.01204e-06	8.21073e-06	7.43713e-06	9.88842e-06	1.25788e-05	5.63973e-06	1.39235e-05	2.31855e-05	5.42785e-06	5.19653e-05
61	AC	GAT	0	0	0	0	0	0	0	0	0	0	0	0	0	0	0	0	0	0	0	0	0	0	0	0
61	AG	GAT	0	0	0	0	0	0	0	0	0	1.56946e-06	1.80608e-06	0	0	3.39307e-06	0	1.36846e-06	0	0	0	1.40993e-06	1.74044e-06	1.36385e-06	0	0
61	AT	GAT	0	0	0	0	0	0	0	0	0	0	0	0	0	0	0	0	3.71856e-06	0	0	0	0	0	0	0
62	TA	ATA	0	0	0	0	0	0	0	0	0	0	0	0	0	0	0	0	0	0	0	0	0	0	0	0
62	TC	ATA	0	0	0	0	0	2.036e-06	0	0	0	1.56946e-06	0	0	0	0	0	1.36846e-06	0	0	0	0	0	0	0	0
62	TG	ATA	0	0	0	0	0	0	0	0	0	0	0	0	0	0	0	0	0	0	0	0	0	0	0	0
63	AC	TAC	0	0	0	0	0	0	0	0	0	0	0	2.83118e-06	0	0	6.01204e-06	4.10537e-06	3.71856e-06	0	0	0	0	5.45542e-06	5.42785e-06	0
63	AG	TAC	1.79515e-06	1.16509e-06	1.66438e-06	4.97177e-06	0	1.018e-06	1.4376e-06	0	0	0	0	9.43728e-07	2.68697e-06	0	0	0	3.71856e-06	1.97768e-06	0	0	3.48088e-06	1.36385e-06	2.71393e-06	0
63	AT	TAC	0	0	0	0	0	0	1.4376e-06	0	0	0	0	0	0	0	0	0	0	0	0	0	0	0	0	0
64	CA	ACA	0	1.16509e-06	0	0	0	1.018e-06	0	0	0	0	0	0	1.34348e-06	3.39307e-06	0	0	0	0	0	0	0	0	0	0
64	CG	ACA	0	0	0	0	0	0	0	0	0	0	0	0	0	3.39307e-06	0	0	0	0	0	0	0	0	0	0
64	CT	ACA	3.5903e-06	5.82543e-06	4.99313e-06	2.48589e-06	0	2.036e-06	2.8752e-06	1.03722e-05	4.3066e-06	7.84731e-06	7.22431e-06	2.83118e-06	2.68697e-06	3.39307e-06	0	0	7.43713e-06	9.88842e-07	2.51577e-06	0	5.22132e-06	5.45542e-06	5.42785e-06	2.73502e-06
65	AC	CAG	0	0	0	0	0	0	0	0	0	0	0	9.43728e-07	0	0	0	1.36846e-06	0	0	0	0	0	0	0	0
65	AG	CAG	1.79515e-06	0	0	1.24294e-06	0	1.018e-06	0	0	0	0	0	1.88746e-06	4.03045e-06	3.39307e-06	0	0	0	0	0	0	0	2.72771e-06	0	2.73502e-06
65	AT	CAG	1.79515e-06	1.16509e-06	0	2.48589e-06	0	0	2.8752e-06	3.45739e-06	4.3066e-06	0	3.61216e-06	0	0	0	0	0	0	0	0	0	0	0	0	0
66	GA	AGC	3.5903e-06	2.33017e-06	1.66438e-06	1.24294e-06	0	0	0	0	1.43553e-06	0	0	0	0	3.39307e-06	0	0	0	9.88842e-07	0	0	0	0	0	0
66	GC	AGC	0	0	0	0	0	1.018e-06	0	0	0	0	1.80608e-06	0	0	0	0	0	0	0	2.51577e-06	0	0	0	0	0
66	GT	AGC	5.38545e-06	2.33017e-06	0	4.97177e-06	9.64469e-06	6.108e-06	4.3128e-06	1.55583e-05	1.29198e-05	3.13892e-05	2.3479e-05	7.54983e-06	1.07479e-05	3.39307e-06	6.01204e-06	2.73691e-06	3.71856e-06	4.94421e-06	7.5473e-06	4.2298e-06	1.04426e-05	9.54698e-06	0	5.19653e-05
67	CA	GCT	0	0	0	0	0	0	0	0	0	0	1.80608e-06	9.43728e-07	0	0	0	0	3.71856e-06	0	0	0	0	0	0	1.36751e-06
67	CG	GCT	0	0	0	0	0	0	0	0	0	0	0	0	0	0	0	0	0	0	0	0	0	0	0	0
67	CT	GCT	1.79515e-06	1.16509e-06	0	1.24294e-06	0	1.018e-06	0	5.18609e-06	0	4.70839e-06	0	9.43728e-07	1.34348e-06	0	0	0	3.71856e-06	1.97768e-06	2.51577e-06	0	1.74044e-06	0	0	6.83754e-06
68	TA	CTA	0	0	1.66438e-06	0	0	0	0	0	1.43553e-06	0	0	0	0	0	0	0	0	0	0	0	0	0	2.71393e-06	1.36751e-06
68	TC	CTA	1.79515e-06	1.16509e-06	0	0	0	2.036e-06	0	1.7287e-06	0	0	0	0	0	0	6.01204e-06	0	0	9.88842e-07	0	0	0	0	5.42785e-06	0
68	TG	CTA	0	0	0	0	0	0	0	0	0	0	0	0	0	0	0	0	0	0	0	0	0	0	0	0
69	AC	TAA	0	0	0	0	0	0	0	0	0	0	0	0	0	0	0	0	0	0	0	1.40993e-06	0	1.36385e-06	0	0
69	AG	TAA	0	0	1.66438e-06	0	0	1.018e-06	1.4376e-06	1.7287e-06	0	1.56946e-06	1.80608e-06	9.43728e-07	0	3.39307e-06	0	4.10537e-06	7.43713e-06	9.88842e-07	0	1.40993e-06	1.74044e-06	1.36385e-06	0	0
69	AT	TAA	0	0	0	0	0	0	0	0	0	0	0	9.43728e-07	0	0	0	0	3.71856e-06	0	0	0	0	0	0	0
70	AC	AAT	0	0	0	0	0	0	0	0	0	0	0	0	0	0	0	0	0	0	0	0	0	0	0	0
70	AG	AAT	0	2.33017e-06	0	0	4.82234e-06	1.018e-06	0	0	2.87106e-06	1.56946e-06	0	0	0	0	6.01204e-06	0	0	9.88842e-07	0	0	0	0	0	0
70	AT	AAT	0	0	1.66438e-06	0	0	0	0	0	0	0	0	0	0	0	0	0	0	0	0	0	0	0	2.71393e-06	0
71	TA	ATT	0	0	0	0	0	0	0	0	0	0	0	0	0	0	0	0	0	0	0	0	0	0	0	0
71	TC	ATT	0	2.33017e-06	0	0	0	0	0	1.7287e-06	0	0	0	0	0	0	6.01204e-06	0	0	2.96653e-06	0	0	0	0	0	0
71	TG	ATT	0	0	0	0	0	0	0	0	0	0	0	0	1.34348e-06	0	0	0	0	0	0	0	0	0	0	0
72	TA	TTC	0	0	0	0	4.82234e-06	0	0	0	0	0	0	9.43728e-07	0	0	0	0	0	0	0	0	0	0	0	0
72	TC	TTC	0	2.33017e-06	0	0	4.82234e-06	0	0	0	0	0	3.61216e-06	9.43728e-07	0	0	0	0	7.43713e-06	0	0	1.40993e-06	0	1.36385e-06	0	0
72	TG	TTC	0	0	0	0	0	0	0	0	0	0	0	0	0	0	0	0	0	0	0	0	0	0	0	0
73	CA	TCA	1.79515e-06	0	1.66438e-06	0	0	0	1.4376e-06	3.45739e-06	0	0	0	0	0	0	0	1.36846e-06	0	9.88842e-07	0	0	0	2.72771e-06	2.71393e-06	0
73	CG	TCA	0.000698313	0	0	0	0	0	7.188e-06	0	1.43553e-06	0	0	9.43728e-07	1.20913e-05	3.39307e-06	0	5.47382e-06	3.71856e-06	0	1.76104e-05	4.2298e-06	0	0	2.71393e-06	0
73	CT	TCA	1.79515e-06	3.49526e-06	0	4.97177e-06	4.82234e-06	3.054e-06	1.4376e-06	1.7287e-06	0	1.56946e-06	5.41823e-06	1.88746e-06	1.34348e-06	3.39307e-06	6.01204e-06	2.73691e-06	0	1.97768e-06	2.51577e-06	4.2298e-06	5.22132e-06	2.72771e-06	2.71393e-06	5.47003e-06
74	AC	CAG	0	0	0	0	0	0	0	0	0	0	0	0	0	0	0	0	0	0	0	0	0	0	0	0
74	AG	CAG	0	3.49526e-06	0	0	4.82234e-06	0	1.4376e-06	0	2.87106e-06	1.56946e-06	0	1.88746e-06	1.34348e-06	0	6.01204e-06	4.10537e-06	7.43713e-06	9.88842e-07	0	0	1.74044e-06	0	2.71393e-06	1.36751e-06
74	AT	CAG	0	2.33017e-06	1.66438e-06	0	0	2.036e-06	1.4376e-06	5.18609e-06	1.43553e-06	3.13892e-06	0	2.83118e-06	0	0	0	0	0	0	0	0	0	4.09156e-06	0	0
75	GA	AGA	0	1.16509e-06	0	0	0	1.018e-06	1.4376e-06	0	2.87106e-06	1.56946e-06	0	0	2.68697e-06	0	6.01204e-06	0	0	1.97768e-06	2.51577e-06	1.40993e-06	1.74044e-06	0	0	0
75	GC	AGA	0	0	0	0	0	0	0	0	0	0	0	0	0	0	0	0	0	0	0	0	0	0	0	0
75	GT	AGA	1.2566e-05	9.32069e-06	4.99313e-06	2.48589e-06	0	4.072e-06	2.8752e-06	8.64348e-06	1.14843e-05	1.88335e-05	1.26425e-05	5.66237e-06	5.37393e-06	6.78615e-06	6.01204e-06	1.09476e-05	2.23114e-05	1.97768e-06	5.03154e-06	7.04966e-06	1.5664e-05	1.09108e-05	0	4.51278e-05
76	AC	GAA	0	0	0	0	0	0	0	0	0	0	0	0	0	0	0	0	0	0	0	0	0	0	0	0
76	AG	GAA	0	5.82543e-06	3.32876e-06	0	0	3.054e-06	1.4376e-06	5.18609e-06	1.43553e-06	0	1.80608e-06	3.77491e-06	4.03045e-06	3.39307e-06	6.01204e-06	6.84228e-06	7.43713e-06	0	0	0	1.04426e-05	1.36385e-06	0	0
76	AT	GAA	0	1.16509e-06	0	0	4.82234e-06	0	0	0	0	1.56946e-06	0	9.43728e-07	1.34348e-06	0	0	0	0	0	2.51577e-06	1.40993e-06	0	0	0	0
77	AC	AAT	0	0	0	0	0	0	0	0	0	0	0	0	0	0	0	0	0	0	0	0	0	0	0	0
77	AG	AAT	0	0	1.66438e-06	1.24294e-06	0	2.036e-06	0	0	0	0	0	0	0	0	6.01204e-06	0	0	0	0	4.2298e-06	1.74044e-06	0	0	1.36751e-06
77	AT	AAT	0	0	0	0	0	0	0	0	0	0	0	9.43728e-07	0	3.39307e-06	0	0	0	9.88842e-07	0	0	0	1.36385e-06	0	1.36751e-06
78	TA	ATC	0	0	0	0	0	1.018e-06	0	0	0	0	0	0	1.34348e-06	0	0	0	0	0	0	0	0	0	0	0
78	TC	ATC	0	2.33017e-06	0	0	0	0	0	1.7287e-06	0	1.56946e-06	0	0	0	0	0	0	0	9.88842e-07	2.51577e-06	0	1.74044e-06	0	0	0
78	TG	ATC	0	0	0	0	0	0	0	0	0	0	0	0	0	0	0	0	0	0	0	0	0	0	0	0
79	CA	TCA	0	0	0	0	0	0	0	0	0	1.56946e-06	0	0	0	0	0	0	0	0	2.51577e-06	0	0	0	0	0
79	CG	TCA	0	0	0	0	0	0	0	0	0	0	0	0	1.34348e-06	0	0	0	0	0	0	0	0	0	0	1.36751e-06
79	CT	TCA	5.38545e-06	1.16509e-06	1.66438e-06	1.24294e-06	0	2.036e-06	0	1.7287e-06	2.87106e-06	4.70839e-06	1.80608e-06	3.77491e-06	1.34348e-06	0	0	2.73691e-06	0	9.88842e-07	5.03154e-06	1.40993e-06	6.96176e-06	0	2.71393e-06	2.73502e-06
80	AC	CAC	0	0	0	0	0	0	0	0	0	0	0	0	0	0	0	0	0	0	0	0	0	0	0	0
80	AG	CAC	0	1.16509e-06	1.66438e-06	1.24294e-06	0	0	0	0	0	0	1.80608e-06	1.88746e-06	0	0	6.01204e-06	0	0	0	0	1.40993e-06	0	0	0	0
80	AT	CAC	1.79515e-06	1.16509e-06	1.66438e-06	4.97177e-06	0	0	1.4376e-06	1.7287e-06	1.43553e-06	1.56946e-06	1.80608e-06	1.88746e-06	0	0	0	0	0	0	0	0	0	0	0	0
81	CA	ACT	0	0	0	0	0	0	0	0	0	0	0	0	0	0	0	0	0	0	2.51577e-06	0	0	0	0	0
81	CG	ACT	0	0	0	0	0	0	0	0	0	0	0	0	1.34348e-06	0	0	0	0	0	0	0	0	0	0	0
81	CT	ACT	0	1.16509e-06	1.66438e-06	0	0	1.018e-06	2.8752e-06	0	4.3066e-06	0	1.80608e-06	9.43728e-07	2.68697e-06	0	0	2.73691e-06	0	9.88842e-07	2.51577e-06	0	1.74044e-06	2.72771e-06	0	0
82	TA	CTT	0	1.16509e-06	0	0	0	0	0	0	0	0	0	0	0	0	0	0	0	0	0	0	1.74044e-06	1.36385e-06	0	2.73502e-06
82	TC	CTT	0	0	0	0	0	1.018e-06	0	0	0	0	0	0	0	0	0	2.73691e-06	0	0	0	0	0	0	0	0
82	TG	CTT	0	0	0	0	0	0	0	0	0	0	0	0	0	0	0	0	0	0	0	0	0	0	0	0
83	TA	TTT	0	0	0	2.48589e-06	2.41117e-05	3.054e-06	7.04424e-05	7.08765e-05	0	0	9.93343e-05	0	0	0	0	1.36846e-06	0	0	8.30203e-05	4.93476e-05	0	1.36385e-06	0	2.73502e-06
83	TC	TTT	0	0	0	0	0	1.018e-06	0	1.7287e-06	0	0	1.80608e-06	1.88746e-06	0	0	0	0	0	0	0	1.40993e-06	0	1.36385e-06	0	0
83	TG	TTT	0	0	0	0	0	0	0	0	0	0	0	0	0	0	0	0	0	0	0	0	0	0	0	0
84	TA	TTG	0	2.33017e-06	0	3.72883e-06	0	6.108e-06	0	3.45739e-06	0	0	0	9.43728e-07	0	3.39307e-06	0	0	0	0	2.51577e-06	0	0	0	0	1.50426e-05
84	TC	TTG	1.79515e-06	1.16509e-06	1.66438e-06	0	0	0	0	3.45739e-06	1.43553e-06	1.56946e-06	0	0	0	0	0	0	3.71856e-06	0	2.51577e-06	0	0	0	0	1.36751e-06
84	TG	TTG	0	0	0	0	0	0	0	0	0	0	0	0	0	0	0	0	0	0	0	0	0	0	0	0
85	GA	TGT	0	0	1.66438e-06	1.24294e-06	0	1.018e-06	0	0	0	0	0	0	0	0	0	0	0	0	0	0	0	1.36385e-06	0	0
85	GC	TGT	0	1.16509e-06	1.66438e-06	0	0	2.036e-06	0	0	1.00487e-05	6.27785e-06	0	3.77491e-06	0	1.35723e-05	0	9.57919e-06	7.43713e-06	1.77992e-05	0	0	1.74044e-06	0	5.42785e-06	2.73502e-06
85	GT	TGT	3.5903e-06	1.16509e-06	0	1.24294e-06	0	0	0	3.45739e-06	1.43553e-06	1.25557e-05	7.22431e-06	0	0	0	0	2.73691e-06	3.71856e-06	1.97768e-06	0	1.40993e-06	6.96176e-06	8.18313e-06	0	1.23076e-05
86	TA	GTG	0	0	3.32876e-06	0	0	0	0	0	0	3.13892e-06	0	9.43728e-07	0	0	1.20241e-05	2.73691e-06	3.71856e-06	0	0	1.40993e-06	0	1.36385e-06	0	0
86	TC	GTG	5.38545e-06	1.16509e-06	3.32876e-06	0	0	0	1.4376e-06	0	0	1.56946e-06	0	0	2.68697e-06	0	6.01204e-06	0	3.71856e-06	1.97768e-06	0	2.81986e-06	1.74044e-06	0	0	1.36751e-06
86	TG	GTG	0	0	0	0	0	0	0	0	0	0	0	0	0	0	0	0	0	0	0	0	0	0	0	0
87	GA	TGG	0	0	0	0	0	3.054e-06	0	0	0	0	0	9.43728e-07	0	0	0	2.73691e-06	3.71856e-06	0	0	1.40993e-06	0	1.36385e-06	0	0
87	GC	TGG	0	0	0	0	0	0	0	0	0	0	0	0	1.34348e-06	0	0	0	0	0	0	0	0	0	0	0
87	GT	TGG	1.79515e-06	2.33017e-06	3.32876e-06	0	0	9.162e-06	1.15008e-05	3.45739e-06	1.00487e-05	3.45282e-05	1.08365e-05	1.88746e-06	4.03045e-06	3.39307e-06	6.01204e-06	4.10537e-06	0	1.97768e-06	7.5473e-06	1.40993e-06	8.70221e-06	1.50024e-05	0	4.10252e-05
88	GA	GGA	0	1.16509e-06	0	0	0	1.018e-06	0	0	0	0	0	0	1.34348e-06	0	0	0	0	0	0	0	0	0	0	0
88	GC	GGA	0	0	0	0	0	0	0	0	0	0	0	0	0	0	0	0	0	0	0	0	0	0	2.71393e-06	0
88	GT	GGA	3.5903e-06	2.33017e-06	3.32876e-06	1.24294e-06	9.64469e-06	4.072e-06	5.7504e-06	6.91478e-06	1.29198e-05	3.13892e-05	1.98669e-05	7.54983e-06	5.37393e-06	1.35723e-05	6.01204e-06	6.84228e-06	3.71856e-06	2.96653e-06	7.5473e-06	1.40993e-06	5.22132e-06	2.04578e-05	1.35696e-05	4.10252e-05
89	AC	GAT	0	0	0	0	0	0	0	0	0	0	0	0	0	0	0	0	0	0	0	0	0	0	0	0
89	AG	GAT	1.79515e-06	1.16509e-06	1.66438e-06	0	4.82234e-06	0	1.4376e-06	0	0	1.56946e-06	0	9.43728e-07	0	0	0	2.73691e-06	3.71856e-06	0	0	0	1.74044e-06	2.72771e-06	2.71393e-06	2.73502e-06
89	AT	GAT	0	0	0	0	0	0	0	0	0	0	0	0	0	0	0	0	0	0	0	0	0	0	2.71393e-06	0
90	TA	ATG	0	0	0	0	0	0	0	0	0	0	0	0	0	0	0	0	0	0	0	0	0	1.36385e-06	5.42785e-06	0
90	TC	ATG	0	1.16509e-06	0	0	0	0	0	1.7287e-06	0	0	0	0	0	0	0	1.36846e-06	0	0	0	1.40993e-06	0	0	2.71393e-06	2.73502e-06
90	TG	ATG	0	0	0	0	0	0	0	0	0	0	0	0	0	0	0	0	0	0	0	0	0	0	0	0
91	GA	TGA	0	1.16509e-06	0	0	0	1.018e-06	0	0	1.43553e-06	0	0	9.43728e-07	0	0	0	0	0	9.88842e-07	0	1.40993e-06	0	0	0	0
91	GC	TGA	0	0	0	0	0	0	0	0	0	0	0	0	0	0	0	0	3.71856e-06	0	0	0	1.74044e-06	0	0	1.36751e-06
91	GT	TGA	1.07709e-05	3.49526e-06	3.32876e-06	6.21472e-06	0	6.108e-06	2.8752e-06	8.64348e-06	2.1533e-05	2.51114e-05	1.62547e-05	5.66237e-06	4.03045e-06	1.69654e-05	1.20241e-05	6.84228e-06	2.97485e-05	1.97768e-06	1.50946e-05	1.40993e-06	1.39235e-05	2.18217e-05	8.14178e-06	6.42729e-05
92	AC	GAG	0	0	0	0	0	0	0	0	0	0	0	0	0	0	0	0	0	0	0	0	0	0	0	0
92	AG	GAG	0	2.33017e-06	0	0	0	0	1.4376e-06	0	0	0	1.80608e-06	9.43728e-07	1.34348e-06	0	0	0	7.43713e-06	0	0	1.40993e-06	0	0	2.71393e-06	0
92	AT	GAG	0	0	0	0	0	0	0	1.7287e-06	0	0	0	0	0	0	0	0	0	9.88842e-07	0	0	0	0	0	0
93	GA	AGT	0	0	0	0	0	0	1.4376e-06	0	0	0	0	0	0	0	0	0	0	0	0	0	0	0	0	0
93	GA	AGT	0	1.16509e-06	0	0	0	0	1.4376e-06	0	1.43553e-06	0	0	9.43728e-07	0	3.39307e-06	6.01204e-06	1.36846e-06	0	9.88842e-07	5.03154e-06	0	0	0	0	0
93	GT	AGT	3.5903e-06	2.33017e-06	1.66438e-06	2.48589e-06	0	4.072e-06	0	3.45739e-06	7.17766e-06	6.27785e-06	9.03039e-06	2.83118e-06	1.34348e-06	0	1.20241e-05	1.36846e-06	0	0	2.51577e-06	0	3.48088e-06	5.45542e-06	2.71393e-06	3.00852e-05
94	TA	GTA	0	0	0	0	0	0	0	0	0	0	0	0	0	0	0	0	7.43713e-06	0	0	0	0	0	2.71393e-06	0
94	TC	GTA	1.79515e-06	2.33017e-06	0	0	4.82234e-06	2.036e-06	0	1.7287e-06	1.43553e-06	3.13892e-06	0	2.83118e-06	1.34348e-06	3.39307e-06	0	1.36846e-06	0	0	0	2.81986e-06	0	2.72771e-06	2.71393e-06	0
94	TG	GTA	0	0	0	0	0	0	0	0	0	0	0	0	0	0	0	0	0	0	0	0	0	0	0	0
95	AC	TAT	0	0	0	0	0	0	0	0	0	0	0	0	0	0	0	0	0	0	0	0	0	0	0	0
95	AG	TAT	0	2.33017e-06	0	0	0	4.072e-06	0	0	1.43553e-06	0	1.80608e-06	2.83118e-06	0	3.39307e-06	0	0	0	0	0	1.40993e-06	0	1.36385e-06	0	1.36751e-06
95	AT	TAT	3.5903e-06	0	0	0	0	0	0	0	0	0	0	0	0	0	0	0	0	0	0	0	0	0	0	0
96	CA	ACG	1.79515e-06	0	0	0	0	1.018e-06	0	0	0	1.56946e-06	0	9.43728e-07	0	0	0	0	3.71856e-06	0	0	0	0	0	0	0
96	CG	ACG	0	0	0	0	0	0	0	0	0	0	0	0	0	0	0	0	0	0	0	0	0	0	0	0
96	CT	ACG	0.000113094	0.000107188	0.000109849	0.000125537	0.000120559	0.00013743	6.03792e-05	0.000115823	0.000101923	0.000109862	0.000110171	0.000134953	0.000130318	0.000128937	0.000114229	0.000105371	0.00013015	7.91074e-05	0.000161009	0.000107155	0.000132274	0.000139113	9.77013e-05	0.000157263
97	GA	TGA	1.79515e-06	0	0	0	0	0	1.4376e-06	0	1.43553e-06	0	3.61216e-06	9.43728e-07	0	0	0	0	3.71856e-06	9.88842e-07	0	0	1.74044e-06	0	2.71393e-06	1.36751e-06
97	GC	TGA	0	0	0	0	0	0	0	0	0	0	0	0	0	0	0	0	0	0	0	0	0	0	0	0
97	GT	TGA	5.38545e-06	8.1556e-06	3.32876e-06	6.21472e-06	4.82234e-06	7.126e-06	4.3128e-06	8.64348e-06	1.00487e-05	1.72641e-05	3.25094e-05	9.43728e-06	2.68697e-06	0	0	5.47382e-06	1.11557e-05	3.95537e-06	2.51577e-06	5.63973e-06	1.21831e-05	8.18313e-06	1.08557e-05	5.60678e-05
98	AC	GAC	0	0	0	0	0	0	0	0	0	0	0	0	0	0	0	0	0	0	0	0	0	0	0	0
98	AG	GAC	0	0	0	2.48589e-06	0	1.018e-06	0	0	0	0	1.80608e-06	0	0	0	0	2.73691e-06	3.71856e-06	0	0	0	0	0	0	0
98	AT	GAC	0	0	0	0	0	0	0	0	0	1.56946e-06	0	9.43728e-07	0	0	0	0	0	0	0	0	0	0	0	0
99	CA	ACC	1.79515e-06	0	0	0	0	0	0	0	0	0	0	0	1.34348e-06	0	0	0	0	0	2.51577e-06	0	0	0	0	0
99	CG	ACC	0	0	0	0	0	0	0	0	0	0	0	0	0	0	0	0	0	0	0	0	1.74044e-06	0	0	0
99	CT	ACC	3.5903e-06	2.33017e-06	4.99313e-06	1.24294e-06	0	6.108e-06	0	0	4.3066e-06	3.13892e-06	1.80608e-06	2.83118e-06	1.34348e-06	3.39307e-06	0	0	0	9.88842e-07	2.51577e-06	4.2298e-06	0	5.45542e-06	0	4.10252e-06
100	CA	CCC	0	0	0	0	0	0	1.4376e-06	0	0	1.56946e-06	0	0	1.34348e-06	0	0	0	0	0	0	0	0	0	0	0
100	CG	CCC	0	0	1.66438e-06	0	0	0	0	0	0	0	0	0	0	0	0	0	0	0	0	0	0	0	0	0
100	CT	CCC	1.79515e-06	4.66034e-06	0	3.72883e-06	0	3.054e-06	0	0	1.43553e-06	6.27785e-06	0	2.83118e-06	1.34348e-06	3.39307e-06	0	1.36846e-06	0	3.95537e-06	2.51577e-06	1.40993e-06	1.74044e-06	4.09156e-06	5.42785e-06	2.73502e-06
101	CA	CCT	0	2.33017e-06	0	1.24294e-06	4.82234e-06	0	0	0	1.43553e-06	0	0	0	0	0	0	0	3.71856e-06	0	0	1.40993e-06	0	0	0	0
101	CG	CCT	0	0	0	0	0	0	0	0	0	0	0	0	0	0	0	0	0	0	0	0	0	1.36385e-06	0	0
101	CT	CCT	1.79515e-06	1.16509e-06	0	0	4.82234e-06	0	0	0	1.43553e-06	1.56946e-06	5.41823e-06	2.83118e-06	1.34348e-06	3.39307e-06	0	1.36846e-06	3.71856e-06	2.96653e-06	1.00631e-05	1.40993e-06	5.22132e-06	0	0	1.36751e-06
102	TA	CTA	0	1.16509e-06	0	0	0	0	1.4376e-06	0	0	1.56946e-06	0	0	0	0	0	0	0	0	0	0	1.74044e-06	0	0	0
102	TC	CTA	0	0	0	0	0	0	0	1.7287e-06	0	0	3.61216e-06	0	0	0	0	0	7.43713e-06	9.88842e-07	0	0	1.74044e-06	0	5.42785e-06	0
102	TG	CTA	0	0	0	0	0	0	0	0	0	0	0	0	0	0	0	0	0	0	0	0	0	0	0	0
103	AC	TAC	0	0	0	1.24294e-06	0	0	0	0	2.87106e-06	3.13892e-06	0	2.83118e-06	0	6.78615e-06	0	5.47382e-06	7.43713e-06	1.58215e-05	0	0	0	0	2.71393e-06	0
103	AG	TAC	0	0	1.66438e-06	0	0	2.036e-06	1.4376e-06	3.45739e-06	1.43553e-06	3.13892e-06	0	1.88746e-06	1.34348e-06	6.78615e-06	0	1.36846e-06	3.71856e-06	9.88842e-07	7.5473e-06	1.40993e-06	1.74044e-06	0	0	4.10252e-06
103	AT	TAC	0	0	0	0	0	0	0	0	0	0	0	0	0	0	0	0	0	0	0	0	0	0	0	0
104	CA	ACG	0	0	0	0	0	0	0	0	0	0	0	9.43728e-07	0	0	0	1.36846e-06	0	0	0	0	0	0	0	0
104	CG	ACG	0	0	0	0	0	0	0	0	0	0	0	0	0	0	0	0	0	0	0	0	0	0	0	0
104	CT	ACG	0.000109504	0.000116509	0.000129821	0.000113108	0.00014467	0.000114016	7.47552e-05	0.000124466	0.000111971	0.000111432	0.000111977	0.000128347	0.000128974	0.000139116	0.000108217	0.000112213	0.000152461	9.394e-05	8.80519e-05	0.000104335	0.00012009	0.0001132	8.14178e-05	0.000131281
105	GA	CGA	0	2.33017e-06	0	0	0	0	0	1.7287e-06	0	1.56946e-06	0	9.43728e-07	2.68697e-06	3.39307e-06	6.01204e-06	1.36846e-06	0	0	2.51577e-06	0	1.74044e-06	0	0	1.36751e-06
105	GC	CGA	0	0	0	0	0	0	0	0	0	0	0	0	0	0	0	0	0	0	0	0	0	0	0	0
105	GT	CGA	7.18059e-06	3.49526e-06	3.32876e-06	3.72883e-06	4.82234e-06	1.018e-06	4.3128e-06	5.18609e-06	1.00487e-05	2.66809e-05	2.70912e-05	7.54983e-06	5.37393e-06	3.39307e-06	0	8.21073e-06	7.43713e-06	1.97768e-06	5.03154e-06	7.04966e-06	6.96176e-06	2.04578e-05	5.42785e-06	4.37603e-05
106	AC	GAT	0	0	3.32876e-06	0	0	0	0	0	0	0	0	0	0	0	0	0	0	0	0	0	0	0	0	0
106	AG	GAT	1.79515e-06	0	0	0	0	0	1.4376e-06	0	0	1.56946e-06	0	1.88746e-06	0	3.39307e-06	0	0	0	9.88842e-07	0	0	0	0	2.71393e-06	0
106	AT	GAT	0	1.16509e-06	0	0	0	0	1.4376e-06	0	0	0	1.80608e-06	0	0	0	0	0	0	0	0	0	0	0	0	0
107	TA	ATA	0	0	0	0	0	0	0	0	0	0	0	0	0	0	0	0	0	0	0	0	0	0	0	0
107	TC	ATA	0	0	1.66438e-06	0	0	1.018e-06	0	1.7287e-06	0	0	0	9.43728e-07	0	3.39307e-06	0	0	3.71856e-06	0	0	1.40993e-06	1.74044e-06	1.36385e-06	0	1.36751e-06
107	TG	ATA	0	0	0	0	0	0	0	0	0	0	0	0	0	0	0	0	0	0	0	0	0	0	0	0
108	AC	TAG	0	0	0	0	0	0	0	0	0	0	0	0	0	0	0	0	0	0	0	0	0	0	0	0
108	AG	TAG	1.79515e-06	1.16509e-06	0	0	0	0	0	0	0	0	0	9.43728e-07	0	0	0	0	0	0	0	0	0	1.36385e-06	0	0
108	AT	TAG	0	1.16509e-06	0	0	0	0	0	0	0	1.56946e-06	0	0	0	0	0	0	0	0	0	0	0	0	0	0
109	GA	AGA	3.5903e-06	0	0	0	0	0	0	0	4.3066e-06	0	1.80608e-06	0	0	0	0	1.36846e-06	3.71856e-06	0	0	0	0	1.36385e-06	0	1.36751e-06
109	GC	AGA	0	0	0	0	0	0	0	0	0	0	0	0	1.34348e-06	0	0	0	3.71856e-06	0	0	0	0	0	0	0
109	GT	AGA	1.07709e-05	4.66034e-06	1.66438e-06	4.97177e-06	4.82234e-06	1.1198e-05	4.3128e-06	1.03722e-05	5.74213e-06	2.35419e-05	3.43155e-05	5.66237e-06	1.34348e-06	0	6.01204e-06	9.57919e-06	7.43713e-06	0	2.51577e-06	2.81986e-06	1.5664e-05	2.18217e-05	1.08557e-05	4.78628e-05
110	AC	GAG	0	0	0	0	0	0	0	0	0	0	0	0	0	0	0	0	0	0	0	0	0	0	0	0
110	AG	GAG	1.79515e-06	1.16509e-06	0	0	9.64469e-06	0	0	0	1.43553e-06	0	0	9.43728e-07	1.34348e-06	0	6.01204e-06	2.73691e-06	0	1.97768e-06	5.03154e-06	0	0	0	0	0
110	AT	GAG	0	0	0	0	0	0	0	0	0	0	0	0	1.34348e-06	0	0	0	0	0	0	0	0	0	0	0
111	GA	AGG	0	0	0	0	0	2.036e-06	0	1.7287e-06	0	3.13892e-06	0	0	0	0	0	0	0	9.88842e-07	0	1.40993e-06	0	0	0	0
111	GC	AGG	0	0	0	0	0	0	0	0	0	0	0	0	0	0	0	0	0	0	0	0	0	0	0	0
111	GT	AGG	1.79515e-06	2.33017e-06	3.32876e-06	3.72883e-06	0	4.072e-06	4.3128e-06	1.21009e-05	1.29198e-05	3.92366e-05	1.98669e-05	1.88746e-06	2.68697e-06	3.39307e-06	0	1.36846e-06	3.71856e-06	1.97768e-06	0	1.40993e-06	5.22132e-06	2.59132e-05	1.62836e-05	4.51278e-05
111+1	GA	GGT	0	0	0	0	0	1.018e-06	1.4376e-06	0	0	1.56946e-06	0	9.43728e-07	0	0	0	0	0	0	2.51577e-06	0	1.74044e-06	1.36385e-06	2.71393e-06	0
111+1	GC	GGT	0	0	0	0	0	0	0	0	0	0	0	0	0	0	0	0	0	0	0	0	0	0	0	0
111+1	GT	GGT	3.5903e-06	2.33017e-06	0	3.72883e-06	0	3.054e-06	1.4376e-06	1.7287e-06	2.87106e-06	1.88335e-05	9.03039e-06	9.43728e-07	2.68697e-06	3.39307e-06	1.20241e-05	4.10537e-06	0	9.88842e-07	0	1.40993e-06	1.74044e-06	2.72771e-06	5.42785e-06	4.23928e-05
111+2	TA	GTA	0	0	0	0	0	1.018e-06	1.4376e-06	0	0	0	0	9.43728e-07	0	0	0	0	0	0	0	1.40993e-06	0	0	0	0
111+2	TC	GTA	0	0	0	1.24294e-06	0	0	0	0	0	0	1.80608e-06	0	1.34348e-06	0	0	2.73691e-06	0	0	5.03154e-06	0	0	0	0	1.36751e-06
111+2	TG	GTA	0	0	0	0	0	0	0	0	0	0	0	0	0	0	0	0	0	0	0	0	0	0	0	1.36751e-06
111+3	AC	TAA	0	0	0	0	0	0	0	0	0	0	0	0	0	0	0	0	0	0	0	0	0	0	0	0
111+3	AG	TAA	0	1.16509e-06	0	0	0	0	0	0	0	1.56946e-06	1.80608e-06	1.88746e-06	0	0	6.01204e-06	1.36846e-06	0	0	2.51577e-06	1.40993e-06	0	0	0	0
111+3	AT	TAA	0	0	0	0	0	0	0	0	0	0	0	0	0	0	0	0	0	0	0	0	0	0	0	0
111+4	AC	AAC	0	0	0	0	0	0	0	0	0	0	0	0	0	0	0	0	0	0	0	0	0	0	0	0
111+4	AG	AAC	3.5903e-06	0	0	0	0	0	1.4376e-06	1.7287e-06	0	0	1.80608e-06	1.88746e-06	1.34348e-06	0	0	0	0	9.88842e-07	0	0	0	0	0	0
111+4	AT	AAC	0	0	0	0	0	0	0	0	0	1.56946e-06	0	0	0	0	0	0	0	0	0	0	0	0	0	0
111+5	CA	ACG	0	1.16509e-06	0	0	0	0	0	0	0	0	0	0	0	0	0	0	0	0	0	0	0	1.36385e-06	0	0
111+5	CG	ACG	0	1.16509e-06	0	1.24294e-06	0	0	0	0	0	0	0	0	0	0	6.01204e-06	0	0	0	0	0	0	0	0	0
111+5	CT	ACG	0.000104119	0.00013049	0.000109849	0.000108136	0.000178427	0.000133358	8.05056e-05	0.000140024	0.000124891	0.000113001	0.000131844	0.000105698	0.000149127	0.000139116	0.000120241	9.98972e-05	0.000152461	8.30627e-05	0.00014843	0.000105745	0.000153159	0.000121383	9.22735e-05	0.000135383
111+6	GA	CGC	1.79515e-06	0	0	1.24294e-06	4.82234e-06	0	1.4376e-06	0	2.87106e-06	0	3.61216e-06	0	2.68697e-06	3.39307e-06	0	1.36846e-06	0	2.96653e-06	0	1.40993e-06	0	0	0	2.73502e-06
111+6	GC	CGC	0	0	0	0	0	0	0	0	0	0	0	0	0	0	0	0	0	0	0	0	0	0	0	0
111+6	GT	CGC	7.18059e-06	4.66034e-06	9.98627e-06	1.36724e-05	9.64469e-06	1.1198e-05	4.3128e-06	1.55583e-05	1.57908e-05	7.06258e-05	3.07033e-05	9.43728e-06	5.37393e-06	1.01792e-05	6.01204e-06	1.91584e-05	1.85928e-05	2.96653e-06	0	7.04966e-06	1.04426e-05	2.86409e-05	1.62836e-05	9.98281e-05
111+7	CA	GCT	0	1.16509e-06	0	0	0	0	1.4376e-06	0	0	0	0	0	0	0	0	0	0	0	2.51577e-06	0	0	0	0	0
111+7	CG	GCT	0	0	0	0	0	0	0	0	0	0	0	0	0	0	0	0	0	0	0	0	0	0	0	0
111+7	CT	GCT	0	3.49526e-06	1.66438e-06	1.24294e-06	4.82234e-06	1.018e-06	0	0	0	1.56946e-06	1.80608e-06	9.43728e-07	0	0	0	1.36846e-06	7.43713e-06	9.88842e-07	2.51577e-06	2.81986e-06	0	1.36385e-06	0	2.73502e-06
111+8	TA	CTG	0	0	0	0	0	0	0	0	0	0	1.80608e-06	0	0	0	0	0	0	0	0	0	0	0	0	0
111+8	TC	CTG	1.79515e-06	2.33017e-06	0	0	0	2.036e-06	0	3.45739e-06	0	1.56946e-06	3.61216e-06	0	2.68697e-06	3.39307e-06	0	4.10537e-06	3.71856e-06	0	0	1.40993e-06	3.48088e-06	1.36385e-06	2.71393e-06	2.73502e-06
111+8	TG	CTG	0	0	0	0	0	0	0	0	0	0	0	0	0	0	0	0	0	0	0	0	0	0	0	0
111+9	GA	TGC	1.79515e-06	2.33017e-06	0	0	0	1.018e-06	2.8752e-06	0	0	3.13892e-06	0	0	1.34348e-06	0	6.01204e-06	2.73691e-06	0	9.88842e-07	0	0	0	1.36385e-06	2.71393e-06	0
111+9	GC	TGC	0	0	0	0	0	0	0	0	0	0	0	0	0	0	0	0	0	0	0	0	0	0	0	0
111+9	GT	TGC	8.97574e-06	3.49526e-06	4.99313e-06	6.21472e-06	4.82234e-06	7.126e-06	2.8752e-06	5.18609e-06	4.3066e-06	3.13892e-05	1.98669e-05	4.71864e-06	1.07479e-05	6.78615e-06	6.01204e-06	5.47382e-06	7.43713e-06	4.94421e-06	1.50946e-05	7.04966e-06	1.39235e-05	1.77301e-05	8.14178e-06	6.83754e-05
111+10	CA	GCT	0	1.16509e-06	0	0	0	0	0	1.7287e-06	0	1.56946e-06	0	9.43728e-07	0	0	0	0	3.71856e-06	0	5.03154e-06	0	0	0	0	0
111+10	CG	GCT	0	0	0	0	0	0	0	0	0	0	0	0	0	0	0	0	0	0	0	0	0	0	0	0
111+10	CT	GCT	7.18059e-06	4.66034e-06	0	2.48589e-06	0	2.036e-06	4.3128e-06	1.7287e-06	2.87106e-06	1.09862e-05	1.08365e-05	4.71864e-06	5.37393e-06	3.39307e-06	0	6.84228e-06	3.71856e-06	1.97768e-06	2.51577e-06	2.81986e-06	0	2.72771e-06	1.35696e-05	5.47003e-06
111+11	TA	CTC	0	0	0	0	0	0	0	0	0	0	0	0	0	0	0	0	0	0	0	0	0	0	0	1.36751e-06
111+11	TC	CTC	0	1.16509e-06	0	0	0	1.018e-06	0	0	0	1.56946e-06	0	0	0	0	0	1.36846e-06	0	0	5.03154e-06	0	0	0	2.71393e-06	0
111+11	TG	CTC	0	0	0	1.24294e-06	0	0	0	0	0	0	0	0	0	0	0	0	0	0	0	0	0	0	0	0
111+12	CA	TCT	0	1.16509e-06	1.66438e-06	2.48589e-06	0	1.018e-06	2.8752e-06	0	2.87106e-06	1.56946e-06	1.80608e-06	0	1.34348e-06	0	0	0	0	9.88842e-07	2.51577e-06	1.40993e-06	1.74044e-06	0	0	1.36751e-06
111+12	CG	TCT	1.79515e-06	0	0	0	0	0	0	0	0	0	0	0	0	0	0	0	0	0	0	0	0	0	0	0
111+12	CT	TCT	0	0	1.66438e-06	0	0	0	1.4376e-06	3.45739e-06	1.43553e-06	3.13892e-06	0	1.88746e-06	0	0	0	0	3.71856e-06	1.97768e-06	0	2.81986e-06	1.74044e-06	0	0	1.36751e-06
111+13	TA	CTA	0	0	0	0	0	0	0	0	0	1.56946e-06	0	0	0	0	0	0	3.71856e-06	0	0	0	0	0	0	0
111+13	TC	CTA	0	0	0	0	0	1.018e-06	1.4376e-06	0	0	0	0	0	0	3.39307e-06	0	0	0	0	2.51577e-06	1.40993e-06	0	0	0	1.36751e-06
111+13	TG	CTA	0	0	0	0	0	0	0	0	0	0	0	0	0	0	0	0	0	0	0	0	0	0	0	0
111+14	AC	TAC	0	0	0	0	0	0	0	0	0	1.56946e-06	0	0	0	0	0	0	0	0	0	0	0	0	0	0
111+14	AG	TAC	0	3.49526e-06	0	3.72883e-06	4.82234e-06	1.018e-06	1.4376e-06	1.7287e-06	0	0	1.80608e-06	2.83118e-06	0	0	0	1.36846e-06	7.43713e-06	9.88842e-07	2.51577e-06	0	0	2.72771e-06	2.71393e-06	0
111+14	AT	TAC	0	1.16509e-06	0	0	0	1.018e-06	0	1.7287e-06	0	0	0	0	0	0	0	1.36846e-06	0	0	0	0	0	0	0	0
111+15	CA	ACA	0	0	0	0	0	0	0	0	0	0	0	0	0	0	0	0	0	0	0	0	0	0	0	0
111+15	CG	ACA	0	0	0	0	0	0	0	0	0	0	0	9.43728e-07	0	0	0	0	0	0	0	0	0	0	0	0
111+15	CT	ACA	3.5903e-06	1.16509e-06	3.32876e-06	8.7006e-06	4.82234e-06	5.09e-06	2.8752e-06	6.91478e-06	1.43553e-06	1.72641e-05	1.08365e-05	7.54983e-06	4.03045e-06	3.39307e-06	0	1.5053e-05	3.71856e-06	2.96653e-06	2.51577e-06	7.04966e-06	1.39235e-05	9.54698e-06	8.14178e-06	1.23076e-05
111+16	AC	CAG	0	0	0	0	0	0	0	0	0	0	0	0	0	0	0	1.36846e-06	0	0	0	0	0	0	0	0
111+16	AG	CAG	3.5903e-06	0	0	2.48589e-06	0	3.054e-06	2.8752e-06	0	2.87106e-06	1.56946e-06	3.61216e-06	9.43728e-07	0	0	0	0	0	0	2.51577e-06	1.40993e-06	0	1.36385e-06	0	0
111+16	AT	CAG	7.18059e-06	2.33017e-06	0	2.48589e-06	4.82234e-06	2.036e-06	1.4376e-06	3.45739e-06	7.17766e-06	3.13892e-06	0	2.83118e-06	1.34348e-06	0	0	0	0	1.97768e-06	2.51577e-06	0	1.74044e-06	0	0	1.36751e-06
111+17	GA	AGT	1.79515e-06	1.16509e-06	0	0	0	2.036e-06	1.4376e-06	1.7287e-06	1.43553e-06	0	0	9.43728e-07	1.34348e-06	0	6.01204e-06	1.36846e-06	3.71856e-06	0	2.51577e-06	0	0	1.36385e-06	0	0
111+17	GC	AGT	0	0	0	0	0	0	0	0	0	0	0	0	0	0	0	0	0	0	0	1.40993e-06	0	0	0	0
111+17	GT	AGT	3.5903e-06	2.33017e-06	0	2.48589e-06	0	0	4.3128e-06	1.7287e-06	5.74213e-06	7.84731e-06	9.03039e-06	9.43728e-07	1.34348e-06	0	0	2.73691e-06	0	9.88842e-07	0	1.40993e-06	8.70221e-06	2.72771e-06	0	3.41877e-05
111+18	TA	GTC	0	0	0	0	0	0	0	0	0	1.56946e-06	0	9.43728e-07	0	0	0	0	0	0	0	0	0	0	0	0
111+18	TC	GTC	0	0	0	0	0	0	0	0	0	1.56946e-06	0	1.88746e-06	1.34348e-06	0	0	0	0	0	0	1.40993e-06	1.74044e-06	2.72771e-06	0	0
111+18	TG	GTC	0	0	0	0	0	0	0	0	0	1.56946e-06	0	0	0	0	0	0	0	0	0	0	0	0	0	0
111+19	CA	TCT	0	0	0	0	0	1.018e-06	0	5.18609e-06	0	0	0	9.43728e-07	0	3.39307e-06	0	1.36846e-06	0	0	0	0	0	0	0	0
111+19	CG	TCT	0	0	0	0	0	0	0	0	0	0	0	0	0	3.39307e-06	0	0	0	0	0	0	0	0	0	0
111+19	CT	TCT	3.5903e-06	3.49526e-06	3.32876e-06	1.24294e-06	0	1.018e-06	1.4376e-06	3.45739e-06	2.87106e-06	3.13892e-06	3.61216e-06	4.71864e-06	1.34348e-06	0	0	1.36846e-06	3.71856e-06	9.88842e-07	2.51577e-06	0	5.22132e-06	1.36385e-06	0	4.10252e-06
111+20	TA	CTG	0	0	0	0	0	0	0	0	0	0	0	0	0	0	0	0	0	0	0	0	0	0	0	0
111+20	TC	CTG	0	0	1.66438e-06	0	0	0	0	1.7287e-06	1.43553e-06	0	0	0	0	3.39307e-06	0	0	0	0	0	0	0	0	2.71393e-06	1.36751e-06
111+20	TG	CTG	0	0	0	1.24294e-06	0	0	0	0	0	0	0	0	0	0	0	0	3.71856e-06	0	0	0	0	0	0	0
111+21	GA	TGC	0	0	0	0	0	0	0	0	0	6.27785e-06	0	9.43728e-07	0	0	0	0	0	0	2.51577e-06	0	0	1.36385e-06	2.71393e-06	1.36751e-06
111+21	GC	TGC	0	0	0	0	0	0	0	0	1.43553e-06	0	0	0	0	0	0	0	0	0	0	0	0	0	0	1.36751e-06
111+21	GT	TGC	1.07709e-05	5.82543e-06	6.65751e-06	1.24294e-06	0	1.018e-06	1.4376e-06	5.18609e-06	1.43553e-05	1.09862e-05	1.08365e-05	2.83118e-06	1.07479e-05	0	6.01204e-06	4.10537e-06	7.43713e-06	1.97768e-06	1.00631e-05	0	3.48088e-06	8.18313e-06	2.71393e-06	3.69227e-05
111+22	CA	GCG	3.5903e-06	1.16509e-06	0	0	0	1.018e-06	0	0	0	1.56946e-06	0	0	0	0	0	1.36846e-06	0	0	2.51577e-06	0	0	0	0	0
111+22	CG	GCG	0	0	0	0	4.82234e-06	0	0	0	0	1.56946e-06	0	0	0	0	0	0	3.71856e-06	0	0	0	0	0	0	0
111+22	CT	GCG	0.000107709	0.000115343	0.000149794	0.000137967	0.000115736	0.000123178	8.33808e-05	0.000150396	0.00012202	0.000131835	0.000131844	0.00012646	0.000131661	0.000115365	9.61926e-05	0.000109476	0.000107838	8.99846e-05	0.000133336	0.000111385	0.000130533	0.000120019	8.95595e-05	0.000120341
111+23	GA	CGT	0	2.33017e-06	1.66438e-06	0	0	4.072e-06	0	0	1.43553e-06	7.84731e-06	5.41823e-06	5.66237e-06	1.34348e-06	0	0	1.36846e-06	3.71856e-06	2.96653e-06	5.03154e-06	1.40993e-06	3.48088e-06	2.72771e-06	2.71393e-06	1.36751e-06
111+23	GC	CGT	0	0	0	0	0	0	0	0	0	0	0	9.43728e-07	0	0	0	0	0	0	0	0	0	0	5.42785e-06	1.36751e-06
111+23	GT	CGT	3.5903e-06	1.16509e-06	0	1.24294e-06	0	7.126e-06	1.4376e-06	5.18609e-06	1.14843e-05	2.35419e-05	3.61216e-06	9.43728e-07	4.03045e-06	0	1.20241e-05	1.36846e-06	0	0	5.03154e-06	2.81986e-06	8.70221e-06	1.50024e-05	5.42785e-06	3.82902e-05
111+24	TA	GTG	0	0	0	0	0	0	0	0	0	0	0	0	1.34348e-06	0	0	0	3.71856e-06	0	0	0	0	0	0	0
111+24	TC	GTG	0	0	0	0	0	1.018e-06	0	1.7287e-06	0	1.56946e-06	0	9.43728e-07	0	3.39307e-06	0	0	0	0	2.51577e-06	0	0	4.09156e-06	0	2.73502e-06
111+24	TG	GTG	0	0	0	0	0	0	0	0	0	0	0	0	0	0	0	0	0	0	0	0	0	0	0	0
111+25	GA	TGC	0	0	0	0	0	0	0	0	0	0	0	9.43728e-07	0	0	0	0	0	9.88842e-07	0	0	0	1.36385e-06	0	1.36751e-06
111+25	GC	TGC	0	0	0	0	4.82234e-06	0	0	0	0	0	0	9.43728e-07	0	0	0	0	0	0	0	0	0	0	0	0
111+25	GT	TGC	3.5903e-06	2.33017e-06	0	0	0	2.036e-06	2.8752e-06	3.45739e-06	4.3066e-06	1.72641e-05	1.62547e-05	1.88746e-06	1.34348e-06	3.39307e-06	6.01204e-06	2.73691e-06	3.71856e-06	1.97768e-06	5.03154e-06	1.40993e-06	1.74044e-06	5.45542e-06	2.71393e-06	3.00852e-05
111+26	CA	GCG	0	1.16509e-06	0	0	4.82234e-06	0	0	0	0	0	0	0	0	0	0	1.36846e-06	3.71856e-06	1.97768e-06	2.51577e-06	0	3.48088e-06	0	2.71393e-06	0
111+26	CG	GCG	0	0	0	0	0	0	0	0	0	0	0	0	1.34348e-06	0	0	0	0	0	0	0	0	0	0	0
111+26	CT	GCG	0.000150792	0.00013981	0.000144801	0.000142938	0.00024594	0.000140484	8.76936e-05	0.00015904	0.000157908	0.000119279	0.000140874	0.000156659	0.000155844	0.00017644	0.000144289	0.000151899	0.000152461	0.000133494	0.000166041	0.000128304	0.00015838	0.000152752	0.000113985	0.000128546
111+27	GA	CGC	1.79515e-06	0	0	1.24294e-06	0	2.036e-06	0	6.91478e-06	2.87106e-06	0	0	1.88746e-06	1.34348e-06	6.78615e-06	6.01204e-06	0	3.71856e-06	2.96653e-06	7.5473e-06	2.81986e-06	6.96176e-06	4.09156e-06	2.71393e-06	1.36751e-06
111+27	GC	CGC	0	0	0	0	0	0	0	0	0	0	0	0	0	0	0	0	0	0	0	0	0	0	0	0
111+27	GT	CGC	1.61563e-05	8.1556e-06	4.99313e-06	7.45766e-06	2.41117e-05	1.018e-05	1.4376e-06	2.2473e-05	1.57908e-05	5.17922e-05	3.25094e-05	3.77491e-06	9.40438e-06	1.35723e-05	0	4.10537e-06	1.48743e-05	3.95537e-06	1.76104e-05	4.2298e-06	1.74044e-05	1.50024e-05	2.71393e-06	9.29906e-05
111+28	CA	GCT	0	1.16509e-06	0	0	0	1.018e-06	0	0	0	0	0	9.43728e-07	0	3.39307e-06	0	0	0	0	0	1.40993e-06	0	0	5.42785e-06	0
111+28	CG	GCT	0	0	0	0	0	0	0	0	0	0	0	0	0	0	0	0	3.71856e-06	0	0	0	0	1.36385e-06	0	0
111+28	CT	GCT	1.79515e-06	2.33017e-06	1.66438e-06	6.21472e-06	9.64469e-06	6.108e-06	5.7504e-06	0	4.3066e-06	4.70839e-06	5.41823e-06	4.71864e-06	1.34348e-06	3.39307e-06	6.01204e-06	2.73691e-06	0	9.88842e-07	0	1.40993e-06	6.96176e-06	2.72771e-06	2.71393e-06	1.09401e-05
111+29	TA	CTT	0	0	0	0	0	1.018e-06	1.4376e-06	0	0	1.56946e-06	1.80608e-06	9.43728e-07	0	0	0	0	0	0	0	0	3.48088e-06	0	2.71393e-06	5.47003e-06
111+29	TC	CTT	1.79515e-06	0	1.66438e-06	0	0	2.036e-06	1.4376e-06	1.7287e-06	1.43553e-06	3.13892e-06	0	3.77491e-06	0	0	0	0	1.11557e-05	9.88842e-07	0	1.40993e-06	0	2.72771e-06	0	9.57256e-06
111+29	TG	CTT	0	0	0	0	0	1.018e-06	0	1.7287e-06	0	1.56946e-06	0	9.43728e-07	0	0	0	1.36846e-06	0	1.97768e-06	0	0	1.74044e-06	0	0	0
111+30	TA	TTG	0	0	0	0	0	1.018e-06	1.4376e-06	0	0	1.56946e-06	0	0	0	0	0	1.36846e-06	0	0	0	0	0	1.36385e-06	0	0
111+30	TC	TTG	0	1.16509e-06	0	1.24294e-06	0	1.018e-06	1.4376e-06	0	0	0	0	0	0	0	0	1.36846e-06	7.43713e-06	9.88842e-07	0	1.40993e-06	0	1.36385e-06	5.42785e-06	0
111+30	TG	TTG	0	0	0	0	0	0	0	0	0	0	0	0	0	0	0	0	0	0	0	0	0	0	0	1.36751e-06
111+31	GA	TGT	0	0	0	0	0	1.018e-06	1.4376e-06	0	0	0	0	0	0	0	0	0	0	0	5.03154e-06	0	0	1.36385e-06	0	1.36751e-06
111+31	GC	TGT	0	0	0	0	0	0	1.4376e-06	0	0	0	0	0	0	0	0	0	0	0	0	0	0	0	0	0
111+31	GT	TGT	1.79515e-06	2.33017e-06	1.66438e-06	1.24294e-06	0	4.072e-06	5.7504e-06	6.91478e-06	1.72264e-05	6.27785e-06	1.62547e-05	9.43728e-07	1.34348e-06	0	1.20241e-05	5.47382e-06	0	1.97768e-06	2.51577e-06	1.40993e-06	5.22132e-06	1.22747e-05	0	3.55552e-05
111+32	TA	GTA	0	0	0	0	0	1.018e-06	0	0	0	0	0	0	0	0	0	0	0	0	0	0	0	0	0	0
111+32	TC	GTA	1.79515e-06	0	0	1.24294e-06	0	1.018e-06	0	0	2.87106e-06	0	1.80608e-06	9.43728e-07	1.34348e-06	0	0	2.73691e-06	0	9.88842e-07	2.51577e-06	0	1.74044e-06	0	0	2.73502e-06
111+32	TG	GTA	0	0	0	0	0	0	0	0	0	0	0	0	0	0	0	0	0	0	0	0	0	0	0	0
111+33	AC	TAA	0	0	0	0	0	0	0	0	0	0	0	0	0	0	0	0	0	0	0	0	0	0	0	0
111+33	AG	TAA	0	1.16509e-06	0	1.24294e-06	0	2.036e-06	1.4376e-06	0	1.43553e-06	0	0	0	0	0	0	2.73691e-06	3.71856e-06	1.97768e-06	0	1.40993e-06	1.74044e-06	1.36385e-06	0	0
111+33	AT	TAA	0	1.16509e-06	0	0	0	1.018e-06	0	0	0	0	0	0	0	0	0	0	0	0	0	0	0	0	0	0
111+34	AC	AAA	0	0	0	0	0	0	0	0	0	0	0	0	1.34348e-06	0	0	0	0	0	0	1.40993e-06	0	0	0	0
111+34	AG	AAA	1.79515e-06	0	0	0	0	1.018e-06	1.4376e-06	1.7287e-06	0	1.56946e-06	0	9.43728e-07	0	3.39307e-06	0	1.36846e-06	3.71856e-06	9.88842e-07	0	2.81986e-06	0	1.36385e-06	2.71393e-06	0
111+34	AT	AAA	0	0	0	0	0	0	0	0	0	0	3.61216e-06	0	0	0	0	0	0	0	0	0	0	0	0	0
111+35	AC	AAG	0	0	0	0	0	0	0	0	0	0	0	0	0	0	0	1.36846e-06	0	0	0	0	0	0	0	1.36751e-06
111+35	AG	AAG	0	1.16509e-06	0	0	0	0	0	1.7287e-06	1.43553e-06	1.56946e-06	0	9.43728e-07	1.34348e-06	0	6.01204e-06	1.36846e-06	0	0	0	0	1.74044e-06	1.36385e-06	0	0
111+35	AT	AAG	1.79515e-06	0	0	1.24294e-06	0	0	0	0	0	0	0	0	0	0	0	0	0	0	2.51577e-06	0	0	0	0	0
111+36	GA	AGG	0	1.16509e-06	0	1.24294e-06	0	0	1.4376e-06	0	0	0	1.80608e-06	0	1.34348e-06	0	0	2.73691e-06	3.71856e-06	1.97768e-06	2.51577e-06	1.40993e-06	0	0	0	0
111+36	GC	AGG	0	0	0	0	0	0	0	0	0	0	0	0	0	0	0	0	0	0	0	0	0	0	0	0
111+36	GT	AGG	5.38545e-06	1.16509e-06	1.66438e-06	7.45766e-06	0	6.108e-06	1.58136e-05	5.18609e-06	1.86619e-05	3.13892e-05	2.16729e-05	5.66237e-06	5.37393e-06	3.39307e-06	6.01204e-06	4.10537e-06	0	4.94421e-06	2.51577e-06	2.81986e-06	1.74044e-05	2.86409e-05	8.14178e-06	7.24779e-05
111+37	GA	GGA	1.79515e-06	0	0	0	4.82234e-06	0	0	0	0	1.56946e-06	0	0	0	0	0	0	0	1.97768e-06	2.51577e-06	0	0	0	0	0
111+37	GC	GGA	0	0	0	0	0	0	0	0	0	0	0	0	0	0	0	1.36846e-06	0	0	0	0	0	0	0	1.36751e-06
111+37	GT	GGA	1.79515e-06	2.33017e-06	0	2.48589e-06	0	1.018e-06	2.8752e-06	1.7287e-06	2.87106e-06	1.88335e-05	1.98669e-05	3.77491e-06	2.68697e-06	0	6.01204e-06	8.21073e-06	1.85928e-05	0	2.51577e-06	5.63973e-06	3.48088e-06	1.36385e-05	8.14178e-06	2.73502e-05
111+38	AC	GAC	0	0	0	0	0	0	0	0	0	0	0	0	0	0	0	0	0	0	0	0	0	0	0	0
111+38	AG	GAC	0	0	1.66438e-06	1.24294e-06	0	3.054e-06	0	0	0	1.56946e-06	1.80608e-06	0	1.34348e-06	3.39307e-06	0	2.73691e-06	3.71856e-06	9.88842e-07	0	2.81986e-06	0	4.09156e-06	2.71393e-06	0
111+38	AT	GAC	0	0	0	0	0	0	0	0	0	0	1.80608e-06	9.43728e-07	0	0	0	0	0	0	0	0	0	0	0	0
111+39	CA	ACG	0	0	0	0	0	0	0	0	0	0	0	0	0	0	6.01204e-06	0	0	9.88842e-07	0	0	0	0	0	0
111+39	CG	ACG	0	0	0	0	0	0	0	0	0	0	0	0	0	0	0	0	0	0	0	0	0	0	0	0
111+39	CT	ACG	0.000105914	9.5537e-05	0.000126493	0.000101921	0.000110914	0.000102818	7.9068e-05	0.000138296	0.000103358	0.000103584	8.66917e-05	0.000120797	0.000110166	0.00017644	9.61926e-05	0.00010674	8.92455e-05	8.00962e-05	0.000145915	0.000104335	0.000113129	9.95614e-05	0.000100415	9.84606e-05
111+40	GA	CGG	1.79515e-06	1.16509e-06	0	0	4.82234e-06	1.018e-06	1.4376e-06	3.45739e-06	1.43553e-06	3.13892e-06	0	1.88746e-06	1.34348e-06	0	0	1.36846e-06	3.71856e-06	0	0	0	0	2.72771e-06	0	0
111+40	GC	CGG	0	0	0	0	0	0	1.4376e-06	0	0	0	0	0	0	0	0	1.36846e-06	0	9.88842e-07	0	0	0	0	0	0
111+40	GT	CGG	1.79515e-06	1.16509e-06	4.99313e-06	2.48589e-06	0	1.018e-06	2.8752e-06	3.45739e-06	5.74213e-06	2.35419e-05	2.52851e-05	3.77491e-06	2.68697e-06	0	0	6.84228e-06	1.85928e-05	2.96653e-06	2.51577e-06	4.2298e-06	8.70221e-06	1.36385e-05	1.08557e-05	3.28202e-05
111+41	GA	GGC	1.79515e-06	1.16509e-06	0	0	0	0	1.4376e-06	1.7287e-06	0	4.70839e-06	0	9.43728e-07	0	0	0	0	3.71856e-06	0	2.51577e-06	2.81986e-06	1.74044e-06	0	0	2.73502e-06
111+41	GC	GGC	0	0	0	0	0	0	0	0	0	0	0	0	1.34348e-06	0	0	0	0	0	0	0	0	0	2.71393e-06	0
111+41	GT	GGC	5.38545e-06	6.99051e-06	0	3.72883e-06	4.82234e-06	8.144e-06	4.3128e-06	1.7287e-06	0	4.0806e-05	3.61216e-05	4.71864e-06	4.03045e-06	3.39307e-06	6.01204e-06	8.21073e-06	1.11557e-05	1.97768e-06	5.03154e-06	5.63973e-06	5.22132e-06	1.77301e-05	5.42785e-06	4.23928e-05
111+42	CA	GCA	0	1.16509e-06	0	0	0	2.036e-06	0	0	1.43553e-06	1.56946e-06	0	0	1.34348e-06	0	0	0	0	9.88842e-07	0	0	0	1.36385e-06	0	2.73502e-06
111+42	CG	GCA	0	0	0	0	0	0	0	0	0	0	0	0	0	0	0	0	0	0	0	0	0	0	0	0
111+42	CT	GCA	0	3.49526e-06	4.99313e-06	4.97177e-06	4.82234e-06	2.036e-06	5.7504e-06	3.45739e-06	0	9.41677e-06	1.80608e-06	1.88746e-06	8.0609e-06	3.39307e-06	6.01204e-06	2.73691e-06	3.71856e-06	1.97768e-06	0	2.81986e-06	1.74044e-06	2.72771e-06	8.14178e-06	9.57256e-06

## Sheet: Kras exon 2 mixed strain
Mutation frequency of Kras exon 2 in SftpcCreER/CreER;Trp53fl/fl;Krasnat/nat or SftpcCreER/CreER;Trp53fl/fl;Krasex3op/ex3op mice
Sample name: treatment (UR: urethane)_genotype (nat: SftpcCreER/CreER;Trp53fl/fl;Krasnat/nat, ex3op: SftpcCreER/CreER;Trp53fl/fl;Krasex3op/ex3op)_tamoxifen_mouse ID
Nucleotide	Substitution	Nucleotide context	UR_ex3op_No Tam_237	UR_ex3op_No Tam_255	UR_ex3op_No Tam_265	UR_nat_No Tam_222	UR_nat_No Tam_225	UR_nat_No Tam_268	UR_ex3op_Tam_243	UR_ex3op_Tam_252	UR_ex3op_Tam_258	UR_nat_Tam_283	UR_nat_Tam_285	UR_nat_Tam_321	PBS_ex3op_No Tam_246	PBS_ex3op_No Tam_247	PBS_ex3op_No Tam_248	PBS_nat_No Tam_273	PBS_nat_No Tam_291	PBS_nat_No Tam_331	PBS_ex3op_Tam_241	PBS_ex3op_Tam_242	PBS_ex3op_Tam_254	PBS_nat_Tam_284	PBS_nat_Tam_288	PBS_nat_Tam_311
132	AC	TAG	0	0	0	0	0	0	0	0	0	0	0	0	0	0	0	0	0	0	1.81039e-06	0	0	0	0	0
132	AG	TAG	0	0	0	0	0	0	0	0	9.85256e-07	4.21425e-06	0	0	0	2.9181e-06	1.78244e-06	0	0	0	0	0	3.37782e-06	0	5.0087e-06	0
132	AT	TAG	0	0	0	0	0	0	0	0	0	0	2.38424e-06	0	0	0	0	0	0	0	0	0	0	0	0	0
133	GA	AGT	2.04965e-06	2.42557e-06	2.77053e-06	0	0	0	0	4.45631e-06	9.85256e-07	0	0	0	0	2.9181e-06	8.9122e-07	0	0	0	0	1.23854e-06	3.37782e-06	0	0	0
133	GC	AGT	0	0	0	0	0	0	0	0	0	0	0	0	0	0	0	0	0	0	0	0	0	0	0	0
133	GT	AGT	2.04965e-06	0	0	0	0	0	1.2678e-06	2.22815e-06	0	0	2.38424e-06	2.07581e-06	0	0	8.9122e-07	0	0	2.83592e-06	0	0	0	0	0	1.333e-05
134	TA	GTA	0	0	0	0	0	0	0	0	0	0	0	0	0	0	0	0	0	0	0	0	0	2.60215e-06	0	0
134	TC	GTA	0	0	0	0	0	0	0	0	0	0	0	0	0	0	0	0	0	0	1.81039e-06	0	0	0	5.0087e-06	0
134	TG	GTA	0	0	0	0	0	0	0	0	0	0	2.38424e-06	1.0379e-06	0	0	0	0	0	0	0	0	0	0	0	0
135	AC	TAA	0	0	0	0	0	0	0	0	0	0	0	0	0	0	0	0	0	0	0	0	0	0	0	2.666e-06
135	AG	TAA	0	0	0	0	0	0	0	0	0	0	0	1.0379e-06	0	0	0	0	0	0	0	0	0	0	5.0087e-06	0
135	AT	TAA	2.04965e-06	0	0	0	0	0	0	0	0	0	0	0	0	0	0	0	0	0	0	0	0	0	0	0
136	AC	AAT	0	0	0	1.89584e-06	0	0	0	2.22815e-06	0	0	2.38424e-06	0	0	2.9181e-06	0	0	0	2.83592e-06	0	0	0	0	0	0
136	AG	AAT	0	0	0	0	0	0	0	0	0	0	0	1.0379e-06	0	0	0	0	0	1.41796e-06	0	0	0	2.60215e-06	0	0
136	AT	AAT	0	0	0	0	0	0	0	0	0	0	0	0	0	0	0	0	0	0	0	0	0	0	0	0
137	TA	ATT	0	0	0	0	0	0	0	0	0	0	0	0	0	0	0	0	0	1.41796e-06	1.81039e-06	0	0	0	2.50435e-06	0
137	TC	ATT	0	4.85113e-06	0	0	0	0	1.2678e-06	0	0	0	0	0	0	0	0	0	0	0	0	0	0	0	0	0
137	TG	ATT	2.04965e-06	4.85113e-06	0	1.70625e-05	6.32271e-06	2.04777e-05	5.07121e-06	6.68446e-06	1.97051e-06	0	4.76849e-06	0	0	2.9181e-06	2.67366e-06	1.43883e-05	4.53363e-06	7.08981e-06	9.05197e-06	7.43123e-06	6.75564e-06	5.20431e-06	2.50435e-06	1.5996e-05
138	TA	TTG	0	0	0	0	6.32271e-06	0	1.2678e-06	0	0	0	0	0	4.11765e-06	0	0	0	0	0	0	0	0	0	0	0
138	TC	TTG	2.04965e-06	0	0	1.89584e-06	0	0	0	0	0	4.21425e-06	0	0	0	0	0	0	0	0	0	1.23854e-06	0	2.60215e-06	0	0
138	TG	TTG	0	0	0	0	0	0	0	0	0	0	0	0	0	0	0	0	0	0	0	0	0	0	0	0
139	GA	TGA	0	0	0	1.89584e-06	0	0	1.2678e-06	0	0	0	0	0	0	0	0	0	0	0	1.81039e-06	1.23854e-06	0	0	2.50435e-06	0
139	GC	TGA	0	0	0	0	0	0	0	0	0	0	0	1.0379e-06	0	0	0	0	0	0	0	0	0	0	0	0
139	GT	TGA	2.04965e-06	2.42557e-06	2.77053e-06	0	0	5.11944e-06	1.2678e-06	0	1.97051e-06	1.6857e-05	2.14582e-05	2.07581e-06	1.23529e-05	0	8.9122e-07	2.87766e-06	4.53363e-06	1.41796e-06	3.62079e-06	2.47708e-06	6.75564e-06	5.20431e-06	5.0087e-06	4.5322e-05
140	AC	GAT	0	0	0	0	0	0	0	0	0	0	0	0	0	0	0	0	0	0	0	0	0	0	0	0
140	AG	GAT	2.04965e-06	0	0	0	0	1.70648e-06	1.2678e-06	0	0	0	0	0	0	0	0	0	0	1.41796e-06	3.62079e-06	0	0	0	0	2.666e-06
140	AT	GAT	0	0	2.77053e-06	0	3.16136e-06	0	0	0	0	0	0	1.0379e-06	0	0	0	0	0	0	0	0	0	0	0	0
141	TA	ATG	0	2.42557e-06	0	1.89584e-06	0	0	0	0	0	0	0	0	4.11765e-06	0	0	0	0	0	0	0	0	0	0	0
141	TC	ATG	0	0	0	0	3.16136e-06	1.70648e-06	2.5356e-06	0	0	4.21425e-06	0	0	4.11765e-06	0	0	0	0	0	0	0	0	0	0	0
141	TG	ATG	0	0	0	0	0	0	1.2678e-06	0	0	0	0	0	0	0	0	0	0	0	0	0	0	0	0	0
142	GA	TGG	0	0	0	1.89584e-06	0	0	1.2678e-06	2.22815e-06	0	0	0	0	0	0	0	0	0	1.41796e-06	0	1.23854e-06	3.37782e-06	0	0	0
142	GC	TGG	0	0	0	0	0	0	0	0	0	0	0	0	0	0	0	0	0	0	0	0	0	0	2.50435e-06	0
142	GT	TGG	0	2.42557e-06	2.77053e-06	0	3.16136e-06	3.41296e-06	3.8034e-06	4.45631e-06	1.97051e-06	3.3714e-05	1.19212e-05	2.07581e-06	4.11765e-06	0	0	2.87766e-06	1.36009e-05	0	3.62079e-06	2.47708e-06	6.75564e-06	1.56129e-05	7.51305e-06	7.1982e-05
143	GA	GGA	0	0	0	0	0	0	0	2.22815e-06	0	0	0	0	0	0	1.78244e-06	0	0	2.83592e-06	0	0	0	2.60215e-06	2.50435e-06	0
143	GC	GGA	0	0	0	0	0	0	0	0	0	0	0	0	0	0	0	0	0	0	0	0	0	0	0	0
143	GT	GGA	0	2.42557e-06	0	1.89584e-06	0	5.11944e-06	5.07121e-06	1.33689e-05	3.94102e-06	4.63568e-05	2.14582e-05	2.07581e-06	4.11765e-06	0	3.56488e-06	2.87766e-06	4.53363e-06	1.41796e-06	5.43118e-06	1.23854e-06	1.68891e-05	2.08172e-05	1.25218e-05	6.1318e-05
144	AC	GAG	0	0	0	0	0	0	0	0	0	0	0	0	0	0	0	0	0	0	0	0	0	0	0	0
144	AG	GAG	0	2.42557e-06	0	0	0	1.70648e-06	0	0	0	0	0	1.0379e-06	0	0	0	0	0	0	0	1.23854e-06	0	0	0	0
144	AT	GAG	0	0	0	0	0	0	0	0	0	0	0	0	4.11765e-06	0	0	0	0	0	0	0	0	0	0	0
145	GA	AGA	0	0	0	0	0	0	0	0	9.85256e-07	0	0	0	0	0	0	2.87766e-06	0	0	0	0	0	0	0	0
145	GC	AGA	0	0	0	0	0	0	0	0	0	0	0	0	0	0	0	0	0	0	0	0	0	0	0	0
145	GT	AGA	2.04965e-06	0	2.77053e-06	3.79168e-06	0	0	0	2.22815e-06	9.85256e-07	0	4.76849e-06	0	0	0	0	0	0	0	0	0	0	0	2.50435e-06	5.332e-06
146	AC	GAA	0	0	0	0	0	0	0	0	0	0	0	0	0	0	0	0	0	0	0	0	0	0	0	0
146	AG	GAA	0	2.42557e-06	2.77053e-06	0	0	0	1.2678e-06	0	0	0	2.38424e-06	1.0379e-06	0	0	0	0	0	0	0	0	3.37782e-06	0	0	0
146	AT	GAA	0	0	0	0	0	3.41296e-06	0	0	9.85256e-07	8.42851e-06	2.14582e-05	1.24549e-05	0	1.45905e-05	0	8.63299e-06	1.81345e-05	4.67927e-05	0	1.11468e-05	0	5.20431e-06	1.25218e-05	1.0664e-05
147	AC	AAA	0	0	0	0	0	0	0	0	0	0	0	0	0	0	0	0	0	0	0	0	0	0	0	0
147	AG	AAA	0	0	0	0	3.16136e-06	0	2.5356e-06	0	0	0	0	0	0	0	0	0	0	0	0	0	0	0	0	0
147	AT	AAA	0	0	0	0	0	0	7.60681e-06	6.68446e-06	0	0	0	0	0	0	0	0	0	0	0	0	0	0	2.50435e-06	0
148	AC	AAC	0	0	0	0	0	0	0	0	0	0	0	0	0	0	0	0	0	0	0	0	0	0	0	0
148	AG	AAC	0	2.42557e-06	0	0	3.16136e-06	3.41296e-06	0	0	9.85256e-07	0	0	0	0	0	0	2.87766e-06	0	0	0	1.23854e-06	3.37782e-06	0	2.50435e-06	0
148	AT	AAC	0	0	0	0	0	1.70648e-06	0	0	0	0	0	0	0	0	0	0	0	0	0	0	0	0	0	0
149	CA	ACC	0	0	0	0	0	1.70648e-06	0	0	0	0	0	1.0379e-06	0	0	0	0	0	0	0	0	0	0	0	0
149	CG	ACC	0	0	0	0	0	0	0	0	0	0	0	0	0	0	0	0	0	0	0	0	0	0	0	0
149	CT	ACC	0	4.85113e-06	1.10821e-05	1.89584e-06	3.16136e-06	0	1.2678e-06	6.68446e-06	0	4.21425e-06	0	1.0379e-06	0	0	8.9122e-07	0	0	0	3.62079e-06	1.23854e-06	0	5.20431e-06	0	7.998e-06
150	CA	CCT	0	0	0	0	0	0	0	0	0	0	0	0	0	0	0	0	0	0	0	1.23854e-06	0	0	2.50435e-06	0
150	CG	CCT	2.04965e-06	0	0	1.89584e-06	0	0	0	0	0	0	0	0	0	0	0	0	0	0	0	0	0	0	0	0
150	CT	CCT	0	0	0	0	0	0	0	0	9.85256e-07	0	0	0	4.11765e-06	0	0	2.87766e-06	0	0	1.81039e-06	0	0	0	0	5.332e-06
151	TA	CTG	0	0	0	0	0	0	0	0	0	0	0	0	0	0	0	0	0	0	0	0	0	0	0	0
151	TC	CTG	2.04965e-06	0	0	0	3.16136e-06	1.70648e-06	0	0	9.85256e-07	0	0	0	0	0	0	0	0	1.41796e-06	1.81039e-06	0	3.37782e-06	0	0	0
151	TG	CTG	0	0	0	0	3.16136e-06	0	0	0	0	0	0	0	0	0	0	0	0	0	0	0	0	0	0	0
152	GA	TGT	4.09931e-06	0	0	0	0	0	0	0	0	0	0	0	4.11765e-06	0	0	0	0	0	0	0	0	0	0	0
152	GC	TGT	0	0	0	0	0	0	0	0	0	0	0	0	0	0	0	0	0	0	0	0	0	0	0	0
152	GT	TGT	0	0	2.77053e-06	1.89584e-06	0	1.70648e-06	1.2678e-06	0	0	0	0	0	0	2.9181e-06	8.9122e-07	5.75533e-06	0	1.41796e-06	0	3.71562e-06	3.37782e-06	5.20431e-06	5.0087e-06	2.1328e-05
153	TA	GTC	0	0	0	0	0	0	0	0	0	0	0	0	0	0	0	0	0	0	0	0	0	0	0	0
153	TC	GTC	2.04965e-06	0	0	0	3.16136e-06	1.70648e-06	1.2678e-06	0	0	4.21425e-06	0	1.0379e-06	0	0	0	0	0	0	0	0	3.37782e-06	0	0	0
153	TG	GTC	0	0	0	0	0	0	0	0	0	0	0	0	0	0	0	0	0	0	1.81039e-06	0	0	0	0	0
154	CA	TCT	0	0	0	0	0	1.70648e-06	0	0	0	0	0	0	0	0	0	0	0	1.41796e-06	0	0	0	0	2.50435e-06	0
154	CG	TCT	0	0	0	0	0	0	0	0	0	0	0	1.0379e-06	4.11765e-06	0	0	0	0	0	0	0	0	0	0	0
154	CT	TCT	0	0	2.77053e-06	1.89584e-06	0	0	0	0	0	0	0	0	4.11765e-06	0	1.78244e-06	2.87766e-06	4.53363e-06	0	0	1.23854e-06	0	0	2.50435e-06	0
155	TA	CTC	0	0	0	0	0	0	1.2678e-06	0	0	0	0	0	0	0	0	0	0	0	0	0	0	0	0	0
155	TC	CTC	2.04965e-06	0	0	0	0	0	1.2678e-06	0	9.85256e-07	0	0	0	0	0	0	0	0	0	0	0	0	0	0	0
155	TG	CTC	0	0	0	0	0	0	0	0	0	0	0	0	0	0	0	0	0	0	3.62079e-06	1.23854e-06	0	0	2.50435e-06	0
156	CA	TCT	0	0	0	0	0	0	0	2.22815e-06	0	4.21425e-06	0	0	0	0	0	0	0	0	1.81039e-06	0	0	0	0	0
156	CG	TCT	0	0	0	0	0	0	0	0	0	0	0	0	0	0	0	0	0	0	0	0	0	0	0	0
156	CT	TCT	2.04965e-06	0	0	0	0	0	0	0	0	0	2.38424e-06	0	4.11765e-06	0	2.67366e-06	0	0	0	0	0	0	2.60215e-06	2.50435e-06	0
157	TA	CTT	0	0	0	0	0	0	0	0	0	0	0	1.0379e-06	0	0	0	0	4.53363e-06	0	0	0	0	0	0	2.666e-06
157	TC	CTT	2.04965e-06	0	0	0	0	0	1.2678e-06	0	0	0	0	0	0	0	0	0	0	1.41796e-06	0	0	0	0	0	0
157	TG	CTT	2.04965e-06	0	0	0	0	0	0	0	0	0	0	0	0	2.9181e-06	0	0	0	0	0	0	3.37782e-06	0	0	0
158	TA	TTG	0	0	0	0	0	0	0	0	0	0	0	0	0	0	8.9122e-07	0	0	0	0	0	0	0	0	0
158	TC	TTG	0	0	0	1.89584e-06	3.16136e-06	0	0	0	0	0	0	1.0379e-06	4.11765e-06	0	0	0	0	0	1.81039e-06	0	0	0	0	0
158	TG	TTG	0	0	0	0	0	0	0	0	0	0	0	0	0	0	0	0	0	0	0	0	0	0	0	0
159	GA	TGG	2.04965e-06	2.42557e-06	2.77053e-06	1.89584e-06	0	0	0	0	0	0	0	1.0379e-06	0	0	0	0	0	1.41796e-06	0	0	0	0	0	0
159	GC	TGG	0	0	0	0	0	0	0	0	0	0	0	0	0	0	0	0	0	0	0	0	0	0	0	0
159	GT	TGG	1.02483e-05	4.85113e-06	2.77053e-06	3.79168e-06	0	1.70648e-05	1.2678e-06	6.68446e-06	2.75872e-05	5.89995e-05	0.000138286	1.0379e-05	0	4.08534e-05	2.67366e-06	2.87766e-05	5.44035e-05	0.000357326	3.62079e-06	6.06884e-05	1.68891e-05	1.30108e-05	8.76523e-05	6.665e-05
160	GA	GGA	0	0	0	0	0	1.70648e-06	0	0	0	4.21425e-06	0	0	0	0	0	0	0	0	0	0	0	0	0	0
160	GC	GGA	0	0	0	0	0	0	0	0	0	0	0	0	0	0	0	0	0	0	0	0	0	0	0	0
160	GT	GGA	4.09931e-06	0	0	1.89584e-06	3.16136e-06	1.70648e-06	6.33901e-06	8.91262e-06	5.91153e-06	5.47853e-05	1.66897e-05	2.07581e-06	4.11765e-06	2.9181e-06	3.56488e-06	5.75533e-06	9.06725e-06	1.41796e-06	0	1.23854e-06	1.01335e-05	1.56129e-05	5.0087e-06	7.998e-05
161	AC	GAT	0	0	0	0	0	0	0	0	0	0	0	0	0	0	0	0	0	0	0	0	0	0	0	0
161	AG	GAT	2.04965e-06	0	0	0	0	0	0	0	9.85256e-07	0	0	0	0	0	8.9122e-07	0	0	0	0	0	0	0	0	0
161	AT	GAT	0	2.42557e-06	0	0	0	0	0	0	0	0	0	0	0	0	8.9122e-07	0	0	1.41796e-06	0	0	0	0	0	0
162	TA	ATA	0	0	0	0	0	0	0	0	0	0	0	0	0	0	0	0	0	0	0	0	0	0	0	0
162	TC	ATA	0	0	0	0	0	0	0	0	0	0	0	0	0	0	0	0	0	0	0	0	0	0	0	0
162	TG	ATA	0	0	0	0	0	0	0	0	0	0	0	0	0	0	0	0	0	0	0	0	0	0	0	0
163	AC	TAT	0	0	0	0	0	0	0	0	0	0	0	0	0	0	0	0	0	0	0	0	0	0	0	0
163	AG	TAT	0	0	0	0	0	0	0	0	0	0	0	0	0	0	0	0	0	1.41796e-06	0	0	0	0	0	0
163	AT	TAT	0	0	0	0	0	0	0	0	0	0	0	0	0	0	0	0	0	0	0	0	0	0	0	0
164	TA	ATT	0	0	0	0	0	0	0	0	0	0	0	0	0	0	0	0	0	0	0	0	0	0	0	0
164	TC	ATT	4.09931e-06	2.42557e-06	0	1.89584e-06	3.16136e-06	0	1.2678e-06	0	0	0	0	0	0	0	0	0	0	0	0	0	0	0	2.50435e-06	7.998e-06
164	TG	ATT	0	0	0	0	0	0	0	0	0	0	0	0	0	0	0	0	0	0	0	0	0	0	0	0
165	TA	TTC	0	0	0	0	0	0	0	0	0	0	2.38424e-06	1.0379e-06	0	0	0	0	0	0	1.81039e-06	0	0	0	0	0
165	TC	TTC	2.04965e-06	0	0	1.89584e-06	0	1.70648e-06	0	0	9.85256e-07	4.21425e-06	2.38424e-06	1.0379e-06	4.11765e-06	0	0	0	4.53363e-06	4.25388e-06	1.81039e-06	0	0	0	2.50435e-06	0
165	TG	TTC	0	0	0	0	0	0	0	0	0	0	0	0	0	0	0	0	0	0	0	0	0	0	0	0
166	CA	TCT	0	0	0	0	0	0	0	0	0	0	0	0	0	0	0	0	0	0	0	0	3.37782e-06	0	0	0
166	CG	TCT	0	0	0	0	0	0	0	0	0	0	0	0	0	0	0	0	0	0	0	0	0	0	0	0
166	CT	TCT	0	0	0	1.89584e-06	0	0	0	2.22815e-06	9.85256e-07	0	0	0	0	0	0	0	0	1.41796e-06	0	0	0	5.20431e-06	0	2.666e-06
167	TA	CTC	0	0	2.77053e-06	0	0	0	0	0	0	0	2.38424e-06	0	0	0	0	0	0	0	0	0	0	0	0	0
167	TC	CTC	0	2.42557e-06	0	1.89584e-06	6.32271e-06	1.70648e-06	0	0	0	0	0	0	0	0	0	0	4.53363e-06	0	3.62079e-06	0	3.37782e-06	0	0	0
167	TG	CTC	0	0	0	0	0	0	0	0	0	0	0	0	0	0	8.9122e-07	0	0	0	0	0	0	0	0	0
168	CA	TCG	0	0	0	0	0	0	0	2.22815e-06	0	0	0	0	0	0	0	0	0	0	0	0	0	0	0	0
168	CG	TCG	0	0	0	0	0	0	0	0	0	0	0	0	0	0	0	0	0	0	0	1.23854e-06	0	0	0	0
168	CT	TCG	5.53407e-05	7.2767e-05	0.000119133	6.25627e-05	8.8518e-05	8.36175e-05	3.8034e-05	7.13009e-05	4.03955e-05	0.000130642	7.15273e-05	6.5388e-05	7e-05	7.29524e-05	5.16908e-05	0.000100718	9.06725e-05	5.10466e-05	8.32781e-05	6.19269e-05	8.44455e-05	8.32689e-05	6.51131e-05	0.000109306
169	GA	CGA	0	0	0	0	0	0	0	0	0	0	0	1.0379e-06	0	0	0	0	0	0	1.81039e-06	1.23854e-06	3.37782e-06	0	0	0
169	GC	CGA	0	0	0	0	0	0	0	0	0	0	0	0	0	0	0	0	0	0	0	0	0	0	0	0
169	GT	CGA	6.14896e-06	4.85113e-06	5.54106e-06	1.89584e-06	6.32271e-06	8.53239e-06	2.5356e-06	1.78252e-05	7.88205e-06	6.32138e-05	1.9074e-05	5.18952e-06	4.11765e-06	2.9181e-06	2.67366e-06	8.63299e-06	4.53363e-06	1.41796e-06	1.81039e-06	2.47708e-06	1.01335e-05	2.60215e-05	5.0087e-06	0.000111972
170	AC	GAC	0	0	0	0	0	0	0	0	0	0	0	0	0	0	0	0	0	0	0	0	0	0	0	0
170	AG	GAC	0	0	2.77053e-06	1.89584e-06	6.32271e-06	0	1.2678e-06	0	0	0	2.38424e-06	0	0	0	0	2.87766e-06	0	0	0	0	3.37782e-06	2.60215e-06	0	0
170	AT	GAC	0	0	0	0	3.16136e-06	0	0	0	0	0	0	0	0	0	0	0	0	0	0	0	0	0	0	0
171	CA	ACA	0	0	0	0	0	0	0	0	0	0	0	1.0379e-06	0	0	0	0	0	0	0	0	0	0	0	2.666e-06
171	CG	ACA	0	0	0	0	0	0	0	0	0	0	0	0	0	0	0	0	0	0	0	0	0	0	0	0
171	CT	ACA	2.04965e-06	2.42557e-06	0	3.79168e-06	3.16136e-06	0	1.2678e-06	6.68446e-06	9.85256e-07	8.42851e-06	4.76849e-06	2.07581e-06	0	0	0	2.87766e-06	0	1.41796e-06	1.81039e-06	1.23854e-06	6.75564e-06	2.60215e-06	2.50435e-06	2.666e-06
172	AC	CAC	0	0	0	0	0	0	0	0	0	0	0	1.0379e-06	0	0	0	0	0	0	0	0	0	0	0	0
172	AG	CAC	2.04965e-06	0	0	0	0	3.41296e-06	2.5356e-06	0	9.85256e-07	0	2.38424e-06	1.0379e-06	0	0	0	0	0	1.41796e-06	1.81039e-06	0	3.37782e-06	7.80646e-06	0	0
172	AT	CAC	0	0	2.77053e-06	0	3.16136e-06	1.70648e-06	0	2.22815e-06	0	0	0	0	0	0	0	0	0	0	0	0	0	0	0	0
173	CA	ACA	0	0	0	0	0	0	0	0	0	0	0	0	0	0	0	0	0	0	0	0	0	0	0	0
173	CG	ACA	2.04965e-06	0	0	0	0	0	0	0	0	0	0	0	0	0	0	0	0	4.25388e-06	0	0	0	2.60215e-06	2.50435e-06	0
173	CT	ACA	0	0	2.77053e-06	3.79168e-06	0	3.41296e-06	1.2678e-06	0	5.91153e-06	8.42851e-06	4.76849e-06	2.07581e-06	0	0	1.78244e-06	1.43883e-05	9.06725e-06	0	1.81039e-06	2.47708e-06	3.37782e-06	0	2.50435e-06	5.332e-06
174	AC	CAG	0	0	0	0	0	0	0	0	0	0	0	0	0	0	0	0	0	0	0	0	0	0	0	0
174	AG	CAG	0	2.42557e-06	0	3.79168e-06	3.16136e-06	0	0	0	0	4.21425e-06	2.38424e-06	1.0379e-06	0	0	8.9122e-07	0	0	0	1.81039e-06	0	0	0	0	0
174	AT	CAG	0	0	0	0	6.32271e-06	0	0	2.22815e-06	0	0	0	1.0379e-06	0	0	0	0	0	0	0	0	0	0	0	0
175	GA	AGC	0	0	2.77053e-06	0	0	0	0	0	1.97051e-06	0	0	0	4.11765e-06	0	0	0	0	1.41796e-06	1.81039e-06	0	0	0	0	0
175	GC	AGC	0	0	0	1.89584e-06	0	0	0	0	0	0	0	0	0	0	0	0	0	0	0	0	0	0	0	0
175	GT	AGC	2.04965e-06	9.70226e-06	8.31158e-06	1.89584e-06	3.16136e-06	3.41296e-06	1.2678e-06	8.91262e-06	9.85256e-06	5.47853e-05	2.86109e-05	8.30323e-06	0	5.8362e-06	6.23854e-06	5.75533e-06	2.26681e-05	2.83592e-06	9.05197e-06	1.23854e-06	2.36447e-05	2.08172e-05	1.25218e-05	0.000143964
176	CA	GCA	0	0	0	0	0	0	0	0	0	4.21425e-06	0	0	0	0	0	0	0	2.83592e-06	0	0	0	0	0	0
176	CG	GCA	6.14896e-06	0	0	0	0	6.82592e-06	0	0	2.95577e-06	8.42851e-06	2.86109e-05	0	4.11765e-06	0	0	1.15107e-05	4.53363e-06	9.07495e-05	0	2.35322e-05	0	0	2.00348e-05	1.0664e-05
176	CT	GCA	0	0	0	3.79168e-06	3.16136e-06	5.11944e-06	0	6.68446e-06	9.85256e-07	0	0	4.15162e-06	0	5.8362e-06	8.9122e-07	2.87766e-06	0	0	3.62079e-06	0	1.35113e-05	5.20431e-06	5.0087e-06	5.332e-06
177	AC	CAG	0	0	0	0	0	0	0	2.22815e-06	0	0	0	0	0	0	0	0	0	0	0	0	0	0	0	0
177	AG	CAG	2.04965e-06	0	0	0	0	0	0	2.22815e-06	0	0	0	2.07581e-06	0	5.8362e-06	0	2.87766e-06	0	0	0	0	3.37782e-06	0	5.0087e-06	5.332e-06
177	AT	CAG	4.09931e-06	0	0	1.89584e-06	0	8.53239e-06	6.46579e-05	6.46165e-05	9.85256e-07	0	7.15273e-06	0	0	0	0	0	0	2.83592e-06	0	0	0	0	0	0
178	GA	AGG	0	0	0	0	0	0	0	0	0	0	0	0	0	0	0	0	0	0	0	1.23854e-06	0	0	2.50435e-06	2.666e-06
178	GC	AGG	0	0	0	0	0	0	0	0	0	0	0	0	0	0	0	0	0	0	0	0	0	0	0	0
178	GT	AGG	4.09931e-06	2.42557e-06	2.77053e-06	3.79168e-06	0	5.11944e-06	2.5356e-06	2.22815e-05	1.97051e-06	8.00708e-05	1.19212e-05	0	4.11765e-06	0	8.9122e-07	2.87766e-06	0	2.83592e-06	5.43118e-06	1.23854e-06	6.75564e-06	2.86237e-05	2.50435e-06	0.00011997
179	GA	GGT	0	0	0	0	0	0	0	0	0	0	0	0	0	0	1.78244e-06	0	0	0	0	0	0	0	0	2.666e-06
179	GC	GGT	0	0	0	0	0	0	0	0	0	0	0	0	0	0	0	0	0	0	0	0	0	0	0	0
179	GT	GGT	4.09931e-06	7.2767e-06	2.77053e-06	5.68752e-06	0	3.41296e-06	1.2678e-06	6.68446e-06	6.89679e-06	2.10713e-05	7.15273e-06	0	0	5.8362e-06	1.78244e-06	5.75533e-06	0	2.83592e-06	1.81039e-06	0	1.35113e-05	7.80646e-06	5.0087e-06	5.332e-05
180	TA	GTC	0	0	0	0	0	0	0	0	0	0	0	0	0	0	0	0	0	0	0	0	0	0	0	0
180	TC	GTC	2.04965e-06	2.42557e-06	0	1.89584e-06	0	0	0	2.22815e-06	0	8.42851e-06	0	0	0	0	8.9122e-07	0	0	0	0	0	0	0	0	0
180	TG	GTC	0	0	0	0	0	0	0	0	0	0	0	0	0	0	0	0	0	0	0	0	0	0	0	0
181	CA	TCA	0	0	0	0	0	1.70648e-06	0	0	0	0	0	0	0	0	0	0	0	0	0	0	0	0	0	2.666e-06
181	CG	TCA	0	2.42557e-06	0	0	0	0	0	0	0	0	0	0	0	0	0	0	0	0	0	0	0	0	0	0
181	CT	TCA	2.04965e-06	2.42557e-06	5.54106e-06	0	3.16136e-06	1.70648e-06	3.8034e-06	0	0	4.21425e-06	0	3.11371e-06	0	2.9181e-06	0	0	0	1.41796e-06	1.81039e-06	1.23854e-06	0	2.60215e-06	2.50435e-06	2.666e-06
182	AC	CAA	0	0	0	0	0	0	1.2678e-06	0	0	0	0	0	0	0	0	0	0	0	0	0	0	0	0	0
182	AG	CAA	0	2.42557e-06	0	3.79168e-06	0	1.70648e-06	1.2678e-06	0	0	4.21425e-06	0	1.0379e-06	8.2353e-06	0	0	5.75533e-06	0	0	1.81039e-06	0	0	2.60215e-06	0	0
182	AT	CAA	0	4.85113e-06	0	1.89584e-06	0	3.41296e-06	0	2.22815e-06	9.85256e-07	8.42851e-06	2.38424e-06	0	0	0	0	0	0	0	1.81039e-06	0	0	0	0	0
183	AC	AAG	0	0	0	0	0	0	0	0	0	0	0	0	0	0	0	0	0	0	0	0	0	0	0	0
183	AG	AAG	0	0	0	0	0	0	0	0	9.85256e-07	0	0	0	0	0	0	0	0	1.41796e-06	0	0	0	0	0	0
183	AT	AAG	0	0	0	0	0	0	0	0	0	0	0	0	0	0	0	0	0	0	0	0	0	0	0	0
184	GA	AGA	0	0	0	0	0	0	0	0	0	4.21425e-06	0	0	0	0	0	0	0	1.41796e-06	0	0	0	0	0	0
184	GC	AGA	0	0	2.77053e-06	0	0	0	0	0	0	0	0	0	0	0	0	0	0	0	0	0	0	0	0	0
184	GT	AGA	0	2.42557e-06	0	1.89584e-06	0	0	0	2.22815e-06	3.94102e-06	1.6857e-05	2.14582e-05	2.07581e-06	4.11765e-06	0	8.9122e-07	5.75533e-06	1.36009e-05	4.25388e-06	0	2.47708e-06	1.01335e-05	1.04086e-05	2.50435e-06	6.9316e-05
185	AC	GAG	0	0	0	0	0	0	0	0	0	0	0	0	0	0	0	0	0	0	0	0	0	0	0	0
185	AG	GAG	0	0	0	0	0	0	1.2678e-06	0	9.85256e-07	0	0	0	4.11765e-06	2.9181e-06	0	0	0	0	0	2.47708e-06	0	0	2.50435e-06	2.666e-06
185	AT	GAG	0	0	0	0	0	0	0	0	0	4.21425e-06	0	0	0	0	0	0	0	0	0	0	0	0	0	0
186	GA	AGG	0	0	0	1.89584e-06	0	0	0	0	0	0	0	0	0	0	0	0	0	0	0	0	0	0	0	0
186	GC	AGG	0	0	0	0	0	0	0	0	0	0	0	0	0	0	0	0	0	0	0	0	0	0	0	0
186	GT	AGG	0	2.42557e-06	2.77053e-06	9.47919e-06	3.16136e-06	1.70648e-06	6.33901e-06	1.33689e-05	6.89679e-06	0.000117999	2.62267e-05	1.0379e-06	8.2353e-06	0	8.9122e-07	8.63299e-06	4.53363e-06	0	3.62079e-06	3.71562e-06	2.70226e-05	3.90323e-05	2.50435e-06	7.7314e-05
187	GA	GGA	0	0	0	1.89584e-06	0	0	0	0	0	0	0	0	0	0	0	0	0	4.25388e-06	0	0	0	0	0	0
187	GC	GGA	0	0	0	0	0	0	0	0	0	0	0	0	0	0	8.9122e-07	0	0	0	0	0	0	0	0	0
187	GT	GGA	6.14896e-06	7.2767e-06	0	1.89584e-06	1.26454e-05	6.82592e-06	1.2678e-06	4.45631e-06	1.57641e-05	7.16423e-05	3.33794e-05	4.15162e-06	1.23529e-05	8.75429e-06	3.56488e-06	1.15107e-05	0	7.08981e-06	1.26728e-05	3.71562e-06	4.72895e-05	2.08172e-05	5.0087e-06	0.000138632
188	AC	GAG	0	0	0	0	0	0	0	0	0	0	0	0	0	0	0	0	0	0	0	0	0	0	0	0
188	AG	GAG	2.04965e-06	0	0	0	0	0	1.2678e-06	2.22815e-06	0	4.21425e-06	0	0	0	2.9181e-06	0	2.87766e-06	0	0	0	1.23854e-06	0	0	0	0
188	AT	GAG	0	0	2.77053e-06	0	0	0	0	0	0	4.21425e-06	0	1.0379e-06	0	0	0	0	0	0	0	0	0	0	2.50435e-06	0
189	GA	AGT	0	0	0	0	0	0	0	0	0	0	2.38424e-06	1.0379e-06	0	2.9181e-06	0	0	0	2.83592e-06	1.81039e-06	0	0	0	0	0
189	GC	AGT	0	0	0	0	0	0	0	0	0	0	0	1.0379e-06	4.11765e-06	0	0	0	0	0	0	0	0	0	0	0
189	GT	AGT	0	0	0	1.89584e-06	0	1.70648e-06	1.14102e-05	2.22815e-06	3.94102e-06	2.10713e-05	1.43055e-05	3.11371e-06	0	0	8.9122e-07	5.75533e-06	0	1.41796e-06	3.62079e-06	1.23854e-06	6.75564e-06	5.20431e-06	2.50435e-06	9.59759e-05
190	TA	GTA	0	0	0	0	0	0	0	0	0	0	0	0	4.11765e-06	0	0	0	0	0	0	0	3.37782e-06	0	0	0
190	TC	GTA	0	0	0	0	0	0	1.2678e-06	0	0	8.42851e-06	0	0	0	0	0	5.75533e-06	0	2.83592e-06	0	1.23854e-06	0	0	5.0087e-06	1.0664e-05
190	TG	GTA	0	0	0	0	0	0	0	0	0	4.21425e-06	0	0	0	0	0	0	0	0	0	0	0	0	0	0
191	AC	TAC	0	0	0	0	0	0	0	0	0	0	0	0	0	0	0	0	0	0	0	0	0	0	0	0
191	AG	TAC	0	0	0	3.79168e-06	0	1.70648e-06	1.2678e-06	2.22815e-06	9.85256e-07	0	0	0	0	0	8.9122e-07	0	0	0	0	0	0	0	5.0087e-06	0
191	AT	TAC	0	0	0	0	0	0	0	0	0	0	0	0	0	0	0	0	0	0	0	0	0	0	0	0
192	CA	ACA	0	0	0	0	0	0	1.2678e-06	0	9.85256e-07	0	0	1.0379e-06	0	0	0	0	0	1.41796e-06	0	0	0	0	0	0
192	CG	ACA	0	2.42557e-06	0	0	0	0	0	0	0	0	0	0	0	0	0	0	0	0	0	0	0	0	0	0
192	CT	ACA	4.09931e-06	0	2.77053e-06	0	3.16136e-06	3.41296e-06	2.5356e-06	8.91262e-06	1.97051e-06	4.21425e-06	2.38424e-06	5.18952e-06	0	5.8362e-06	1.78244e-06	0	4.53363e-06	4.25388e-06	0	0	1.01335e-05	2.60215e-06	5.0087e-06	1.0664e-05
193	AC	CAG	0	0	0	0	0	0	0	0	9.85256e-07	0	0	0	0	0	8.9122e-07	0	0	0	0	0	0	0	0	0
193	AG	CAG	2.04965e-06	0	0	0	0	1.70648e-06	1.2678e-06	0	0	0	0	0	4.11765e-06	2.9181e-06	0	0	1.36009e-05	0	0	2.47708e-06	0	0	5.0087e-06	0
193	AT	CAG	0	0	0	0	3.16136e-06	0	1.2678e-06	6.68446e-06	9.85256e-07	0	0	1.0379e-06	0	0	8.9122e-07	0	0	0	0	0	0	0	0	0
194	GA	AGT	0	0	0	0	0	1.70648e-06	1.2678e-06	0	0	0	0	0	0	0	0	0	0	0	0	0	0	0	0	0
194	GC	AGT	0	0	0	0	0	0	0	0	0	0	0	0	0	0	0	0	0	0	0	1.23854e-06	0	0	0	0
194	GT	AGT	4.09931e-06	2.42557e-06	2.77053e-06	1.89584e-06	3.16136e-06	0	0	0	1.97051e-06	4.21425e-06	7.15273e-06	0	0	0	1.78244e-06	2.87766e-06	0	0	0	2.47708e-06	0	5.20431e-06	0	5.0654e-05
195	TA	GTG	0	0	0	0	0	0	0	0	9.85256e-07	0	0	1.0379e-06	0	0	1.78244e-06	0	0	0	0	0	0	0	0	0
195	TC	GTG	0	0	2.77053e-06	0	3.16136e-06	0	0	0	9.85256e-07	0	0	0	4.11765e-06	0	0	2.87766e-06	0	0	0	2.47708e-06	3.37782e-06	0	0	2.666e-06
195	TG	GTG	0	0	0	0	0	0	0	0	0	0	0	0	0	0	0	0	0	0	0	0	0	0	0	0
196	GA	TGC	0	2.42557e-06	0	1.89584e-06	0	0	2.5356e-06	0	0	4.21425e-06	0	0	0	2.9181e-06	0	0	0	0	0	0	0	0	2.50435e-06	0
196	GC	TGC	0	0	0	0	0	0	0	0	0	0	0	0	0	0	0	0	0	1.41796e-06	0	0	0	0	0	0
196	GT	TGC	4.09931e-06	7.2767e-06	5.54106e-06	1.89584e-06	3.16136e-06	3.41296e-06	2.5356e-06	1.78252e-05	8.8673e-06	5.47853e-05	2.62267e-05	3.11371e-06	2.47059e-05	2.9181e-06	2.67366e-06	5.75533e-06	0	0	9.05197e-06	7.43123e-06	2.36447e-05	1.30108e-05	2.50435e-06	0.000127968
197	CA	GCA	0	0	0	0	0	0	0	0	0	0	0	0	0	0	0	5.75533e-06	0	0	1.81039e-06	0	0	0	2.50435e-06	0
197	CG	GCA	0	0	0	0	0	0	0	0	0	0	0	0	0	0	0	0	0	0	0	0	0	0	0	0
197	CT	GCA	2.04965e-06	2.42557e-06	5.54106e-06	0	6.32271e-06	1.70648e-06	0	6.68446e-06	9.85256e-07	2.10713e-05	2.38424e-06	1.0379e-06	4.11765e-06	2.9181e-06	0	5.75533e-06	0	1.41796e-06	1.81039e-06	1.23854e-06	0	5.20431e-06	5.0087e-06	1.0664e-05
198	AC	CAA	0	0	0	0	0	0	0	0	0	0	0	3.11371e-06	0	0	0	0	0	0	0	0	0	0	0	0
198	AG	CAA	0	9.70226e-06	2.77053e-06	1.89584e-06	9.48407e-06	1.70648e-06	0	2.22815e-06	1.97051e-06	0	0	0	0	0	8.9122e-07	0	4.53363e-06	0	3.62079e-06	1.23854e-06	0	5.20431e-06	2.50435e-06	0
198	AT	CAA	0	0	0	1.89584e-06	0	1.70648e-06	0	2.22815e-06	0	0	0	2.07581e-06	0	0	0	0	0	0	0	0	0	0	0	0
199	AC	AAT	0	0	0	0	2.84522e-05	0	1.2678e-05	1.78252e-05	0	0	3.09952e-05	5.18952e-06	8.2353e-06	0	0	0	0	6.38082e-05	2.89663e-05	1.98166e-05	0	0	2.25392e-05	0
199	AG	AAT	0	0	0	1.89584e-06	0	0	0	0	0	0	0	0	8.2353e-06	2.9181e-06	0	0	0	0	0	0	0	2.60215e-06	0	0
199	AT	AAT	0	0	0	0	0	0	0	0	0	0	0	0	0	0	0	0	0	0	0	0	0	0	0	0
200	TA	ATG	0	0	0	0	0	0	0	0	0	0	0	0	4.11765e-06	0	0	0	0	0	0	0	0	0	0	0
200	TC	ATG	0	0	0	0	0	0	0	0	0	0	0	0	0	0	0	0	0	0	0	0	0	2.60215e-06	0	0
200	TG	ATG	0	0	0	0	0	0	0	0	0	0	0	0	0	0	0	0	0	0	0	0	0	0	0	0
201	GA	TGA	0	2.42557e-06	0	1.89584e-06	0	0	2.5356e-06	2.22815e-06	0	0	0	1.0379e-06	0	0	0	0	0	1.41796e-06	0	0	0	0	0	0
201	GC	TGA	0	0	0	0	0	0	0	0	0	0	0	0	0	0	0	0	0	0	0	0	0	0	0	0
201	GT	TGA	6.14896e-06	4.85113e-06	5.54106e-06	5.68752e-06	0	6.82592e-06	1.2678e-06	4.45631e-06	5.91153e-06	2.52855e-05	2.86109e-05	3.11371e-06	4.11765e-06	5.8362e-06	8.9122e-07	8.63299e-06	4.53363e-06	0	9.05197e-06	7.43123e-06	1.35113e-05	1.56129e-05	7.51305e-06	8.2646e-05
202	AC	GAG	0	0	0	0	0	0	0	0	0	0	0	0	0	0	0	0	0	0	0	0	0	0	0	0
202	AG	GAG	2.04965e-06	0	0	0	0	0	0	0	0	0	0	0	0	0	8.9122e-07	0	0	0	0	0	0	0	0	0
202	AT	GAG	0	0	0	0	0	0	0	0	0	0	0	0	0	0	0	0	0	0	1.81039e-06	0	0	0	0	0
203	GA	AGG	0	0	0	0	0	1.70648e-06	0	0	9.85256e-07	0	0	2.07581e-06	0	2.9181e-06	0	0	0	0	1.81039e-06	0	0	0	0	0
203	GC	AGG	0	0	0	0	0	0	0	0	0	0	0	0	0	0	0	0	0	0	0	0	0	0	0	0
203	GT	AGG	2.04965e-06	2.42557e-06	0	0	0	0	3.8034e-06	4.45631e-06	1.97051e-06	1.26428e-05	9.53698e-06	1.0379e-06	0	0	8.9122e-07	2.87766e-06	0	0	0	1.23854e-06	6.75564e-06	7.80646e-06	2.50435e-06	1.8662e-05
204	GA	GGG	0	0	0	0	3.16136e-06	0	0	0	0	4.21425e-06	0	0	4.11765e-06	0	0	0	0	1.41796e-06	0	0	0	0	0	2.666e-06
204	GC	GGG	0	0	0	0	0	0	0	0	0	0	0	0	0	0	0	0	0	0	0	1.23854e-06	0	0	0	0
204	GT	GGG	0	2.42557e-06	0	3.79168e-06	0	3.41296e-06	3.8034e-06	2.22815e-06	9.85256e-07	3.3714e-05	1.43055e-05	0	0	0	8.9122e-07	5.75533e-06	0	0	0	3.71562e-06	1.35113e-05	2.60215e-06	2.50435e-06	2.3994e-05
205	GA	GGA	0	0	0	0	0	0	0	0	0	0	0	0	0	0	0	0	0	0	0	0	0	0	0	0
205	GC	GGA	0	0	0	0	0	0	0	0	0	0	0	0	0	0	0	0	0	0	0	0	0	0	0	0
205	GT	GGA	0	4.85113e-06	2.77053e-06	5.68752e-06	0	1.70648e-06	1.2678e-06	2.22815e-06	8.8673e-06	3.3714e-05	2.38424e-05	7.26533e-06	4.11765e-06	2.9181e-06	0	0	9.06725e-06	4.25388e-06	3.62079e-06	2.47708e-06	6.75564e-06	1.30108e-05	7.51305e-06	8.2646e-05
206	AC	GAC	0	0	0	0	0	0	0	0	0	0	0	0	0	0	0	0	0	0	0	0	0	0	0	0
206	AG	GAC	0	4.85113e-06	0	0	3.16136e-06	1.70648e-06	0	0	0	8.42851e-06	2.38424e-06	1.0379e-06	0	0	0	2.87766e-06	0	0	0	0	0	2.60215e-06	0	0
206	AT	GAC	0	0	0	0	0	0	0	0	0	0	0	0	0	0	8.9122e-07	0	0	0	0	0	0	0	0	0
207	CA	ACC	0	0	0	0	0	0	0	0	0	0	0	0	0	0	0	0	4.53363e-06	0	0	1.23854e-06	0	0	0	2.666e-06
207	CG	ACC	0	0	0	0	0	0	0	0	0	0	0	0	0	0	0	0	0	0	0	0	0	0	0	0
207	CT	ACC	0	0	0	0	0	3.41296e-06	1.2678e-06	1.11408e-05	0	0	0	1.0379e-06	0	0	0	0	0	0	0	2.47708e-06	3.37782e-06	0	5.0087e-06	0
208	CA	CCA	0	0	0	0	0	0	0	0	0	0	0	0	0	0	0	0	0	0	0	0	0	0	0	0
208	CG	CCA	2.04965e-06	0	0	0	0	0	0	0	0	0	0	0	0	0	0	0	0	0	0	0	0	0	0	0
208	CT	CCA	4.09931e-06	9.70226e-06	8.31158e-06	3.79168e-06	0	5.11944e-06	0	6.68446e-06	2.95577e-06	2.10713e-05	2.38424e-06	1.0379e-06	0	2.9181e-06	1.78244e-06	2.87766e-06	4.53363e-06	0	5.43118e-06	1.23854e-06	6.75564e-06	2.60215e-06	2.50435e-06	1.5996e-05
209	AC	CAG	0	0	0	0	0	0	0	0	0	0	0	0	0	0	0	0	0	0	0	0	0	0	0	0
209	AG	CAG	0	0	2.77053e-06	1.89584e-06	0	1.70648e-06	0	0	0	0	2.38424e-06	0	4.11765e-06	0	8.9122e-07	0	0	2.83592e-06	3.62079e-06	0	3.37782e-06	2.60215e-06	2.50435e-06	5.332e-06
209	AT	CAG	0	4.85113e-06	5.54106e-06	1.89584e-06	0	1.70648e-06	1.2678e-06	2.22815e-06	1.97051e-06	4.21425e-06	2.38424e-06	1.0379e-06	0	0	0	0	0	0	0	0	0	0	0	0
210	GA	AGT	0	0	0	0	3.16136e-06	0	0	0	9.85256e-07	0	0	0	4.11765e-06	0	0	0	0	0	0	0	0	2.60215e-06	0	0
210	GC	AGT	0	0	0	0	0	0	0	0	0	0	0	0	0	0	8.9122e-07	0	0	0	0	0	0	0	0	0
210	GT	AGT	2.04965e-06	7.2767e-06	0	1.89584e-06	0	0	2.5356e-06	6.68446e-06	2.95577e-06	8.42851e-06	1.19212e-05	0	4.11765e-06	2.9181e-06	8.9122e-07	5.75533e-06	0	0	0	1.23854e-06	3.37782e-06	5.20431e-06	0	6.1318e-05
211	TA	GTA	0	0	0	0	0	0	0	0	0	0	0	0	0	0	0	0	0	0	0	0	0	0	0	0
211	TC	GTA	2.04965e-06	4.85113e-06	5.54106e-06	0	0	5.11944e-06	0	0	9.85256e-07	4.21425e-06	2.38424e-06	0	0	2.9181e-06	8.9122e-07	0	0	0	1.81039e-06	0	0	0	2.50435e-06	0
211	TG	GTA	0	0	0	0	0	0	0	0	0	0	0	0	0	0	0	0	0	0	0	0	0	0	0	0
212	AC	TAC	0	0	0	0	0	0	0	0	0	0	0	0	0	0	0	0	0	0	0	0	0	0	0	0
212	AG	TAC	0	2.42557e-06	0	0	0	0	0	2.22815e-06	9.85256e-07	0	0	0	0	2.9181e-06	0	0	0	0	0	1.23854e-06	0	0	0	0
212	AT	TAC	0	0	0	0	0	0	0	0	0	0	0	0	0	0	0	0	0	0	0	0	0	0	0	0
213	CA	ACA	0	0	0	0	0	1.70648e-06	0	0	0	0	0	0	0	0	0	0	0	0	0	0	0	0	0	0
213	CG	ACA	0	0	0	0	0	0	0	0	0	0	0	1.0379e-06	0	0	0	0	0	0	0	0	0	0	0	0
213	CT	ACA	2.04965e-06	4.85113e-06	0	5.68752e-06	3.16136e-06	5.11944e-06	2.5356e-06	0	9.85256e-07	1.26428e-05	2.38424e-06	5.18952e-06	0	2.9181e-06	4.4561e-06	8.63299e-06	4.53363e-06	0	3.62079e-06	1.23854e-06	3.37782e-06	7.80646e-06	2.50435e-06	1.0664e-05
214	AC	CAT	0	0	0	0	0	0	0	0	0	0	0	0	0	0	0	0	0	0	0	0	0	0	0	0
214	AG	CAT	0	2.42557e-06	0	0	0	1.70648e-06	0	0	0	0	0	0	4.11765e-06	0	0	0	4.53363e-06	0	0	0	0	0	0	0
214	AT	CAT	0	0	0	0	0	0	0	0	1.97051e-06	0	0	0	0	0	0	0	0	0	0	0	0	0	0	0
215	TA	ATG	0	0	0	0	0	0	0	2.22815e-06	0	0	0	0	0	0	0	0	0	0	0	0	0	0	0	0
215	TC	ATG	0	0	0	0	0	0	0	0	9.85256e-07	8.42851e-06	0	0	0	0	0	2.87766e-06	0	0	0	0	3.37782e-06	0	0	0
215	TG	ATG	0	0	0	0	0	0	0	0	0	0	0	0	0	0	0	0	0	0	0	0	0	0	0	0
216	GA	TGA	0	2.42557e-06	0	1.89584e-06	0	1.70648e-06	0	0	0	0	2.38424e-06	0	0	0	0	0	0	0	1.81039e-06	1.23854e-06	0	0	0	0
216	GC	TGA	0	2.42557e-06	0	0	0	0	0	0	0	0	0	0	0	0	0	0	0	0	0	0	0	0	0	0
216	GT	TGA	0	0	0	1.89584e-06	0	0	2.5356e-06	2.22815e-06	0	8.42851e-06	1.66897e-05	0	0	0	1.78244e-06	2.87766e-06	0	0	3.62079e-06	0	6.75564e-06	7.80646e-06	2.50435e-06	3.999e-05
217	AC	GAG	0	0	0	0	0	0	0	0	0	0	0	0	0	0	0	0	0	0	0	0	0	0	0	0
217	AG	GAG	4.09931e-06	2.42557e-06	0	0	0	0	0	4.45631e-06	9.85256e-07	0	0	1.0379e-06	0	0	0	0	0	1.41796e-06	0	1.23854e-06	0	0	0	0
217	AT	GAG	0	0	0	0	0	0	0	0	0	0	0	0	0	0	0	0	0	0	0	0	0	0	0	0
218	GA	AGA	0	2.42557e-06	0	1.89584e-06	3.16136e-06	1.70648e-06	0	0	0	0	0	0	0	0	0	0	0	0	1.81039e-06	0	0	0	0	0
218	GC	AGA	0	0	0	0	0	0	0	0	0	0	0	0	0	0	0	0	0	0	0	1.23854e-06	0	0	0	0
218	GT	AGA	0	0	2.77053e-06	0	0	0	0	2.22815e-06	9.85256e-07	0	7.15273e-06	1.0379e-06	8.2353e-06	0	0	2.87766e-06	4.53363e-06	0	1.81039e-06	1.23854e-06	0	5.20431e-06	0	3.1992e-05
219	AC	GAA	0	0	0	0	0	0	0	0	0	0	0	0	0	0	0	0	0	0	0	0	0	0	0	0
219	AG	GAA	0	0	0	0	0	3.41296e-06	0	0	0	0	2.38424e-06	1.0379e-06	0	0	0	5.75533e-06	0	0	0	0	0	5.20431e-06	0	0
219	AT	GAA	0	0	0	0	0	0	0	0	0	0	0	0	0	0	0	0	0	0	0	0	0	0	0	0
220	AC	AAC	0	0	0	0	0	0	0	2.22815e-06	0	0	0	0	0	0	0	0	0	0	0	0	0	0	0	2.666e-06
220	AG	AAC	0	2.42557e-06	0	0	3.16136e-06	0	0	0	0	0	0	0	4.11765e-06	0	0	0	0	0	0	0	0	0	0	0
220	AT	AAC	0	0	0	0	0	0	0	0	0	0	0	0	0	0	0	0	0	0	0	0	0	0	0	0
221	CA	ACT	0	0	0	0	0	0	0	0	0	0	0	0	0	2.9181e-06	0	0	0	0	0	0	0	0	0	0
221	CG	ACT	0	0	0	0	0	0	0	0	0	0	0	0	0	0	0	0	0	0	0	0	0	0	0	0
221	CT	ACT	0	0	0	1.89584e-06	0	1.70648e-06	1.2678e-06	0	1.97051e-06	4.21425e-06	2.38424e-06	1.0379e-06	4.11765e-06	0	0	0	0	1.41796e-06	1.81039e-06	0	0	2.60215e-06	2.50435e-06	2.666e-06
222	TA	CTG	0	0	0	0	0	0	0	0	0	0	0	0	0	0	0	0	0	0	0	0	0	0	0	0
222	TC	CTG	0	0	0	0	0	0	0	0	0	0	0	0	0	0	0	0	4.53363e-06	1.41796e-06	0	0	0	0	5.0087e-06	0
222	TG	CTG	0	0	0	1.89584e-06	0	0	0	0	0	0	0	0	0	0	0	0	0	0	0	0	0	0	0	0
223	GA	TGG	0	0	0	0	0	1.70648e-06	0	4.45631e-06	9.85256e-07	0	0	0	8.2353e-06	2.9181e-06	0	0	0	0	0	0	0	0	0	0
223	GC	TGG	0	0	0	1.89584e-06	2.52908e-05	0	2.28204e-05	1.78252e-05	0	0	2.14582e-05	4.15162e-06	0	0	0	0	0	6.94801e-05	1.44832e-05	1.73395e-05	0	0	3.25566e-05	0
223	GT	TGG	2.04965e-06	2.42557e-06	0	0	0	1.70648e-06	3.8034e-06	4.45631e-06	9.85256e-07	3.79283e-05	2.62267e-05	2.07581e-06	0	0	1.78244e-06	2.87766e-06	4.53363e-06	0	0	1.23854e-06	1.35113e-05	1.82151e-05	7.51305e-06	3.999e-05
224	GA	GGG	0	0	2.77053e-06	1.89584e-06	0	0	0	2.22815e-06	0	0	0	1.0379e-06	0	0	0	0	0	0	0	0	0	0	0	0
224	GC	GGG	0	0	0	0	0	1.70648e-06	0	4.45631e-06	0	0	2.38424e-06	0	0	0	0	2.87766e-06	0	1.41796e-06	0	0	0	2.60215e-06	0	0
224	GT	GGG	0	0	0	0	0	3.41296e-06	1.2678e-06	1.55971e-05	3.94102e-06	4.63568e-05	1.9074e-05	5.18952e-06	8.2353e-06	0	1.78244e-06	5.75533e-06	4.53363e-06	0	1.81039e-06	0	1.68891e-05	2.34194e-05	5.0087e-06	6.1318e-05
225	GA	GGG	0	0	0	0	0	1.70648e-06	0	0	9.85256e-07	0	0	1.0379e-06	0	5.8362e-06	0	0	0	0	0	0	3.37782e-06	0	0	0
225	GC	GGG	0	0	2.77053e-06	0	0	0	0	0	9.85256e-07	0	0	0	0	0	0	2.87766e-06	4.53363e-06	0	0	0	0	0	0	2.666e-06
225	GT	GGG	0	0	0	0	3.16136e-06	0	2.5356e-06	4.45631e-06	3.94102e-06	2.94998e-05	1.19212e-05	2.07581e-06	0	0	0	0	4.53363e-06	0	0	0	1.35113e-05	1.82151e-05	0	3.4658e-05
226	GA	GGA	0	0	0	0	0	0	0	0	0	0	0	0	0	0	0	0	0	1.41796e-06	0	1.23854e-06	0	0	0	0
226	GC	GGA	4.09931e-06	0	2.77053e-06	0	0	0	0	0	0	0	0	0	0	0	1.78244e-06	0	0	0	0	0	0	5.20431e-06	0	0
226	GT	GGA	0	0	0	3.79168e-06	0	0	1.2678e-06	4.45631e-06	3.94102e-06	1.26428e-05	9.53698e-06	2.07581e-06	0	0	0	2.87766e-06	0	0	0	1.23854e-06	0	2.60215e-06	2.50435e-06	2.1328e-05
227	AC	GAG	2.04965e-06	0	0	0	0	0	0	0	0	0	0	0	0	0	1.78244e-06	0	0	0	0	0	0	2.60215e-06	0	0
227	AG	GAG	2.04965e-06	2.42557e-06	0	0	0	0	1.2678e-06	0	0	0	0	2.07581e-06	0	0	0	0	0	0	0	0	0	0	0	0
227	AT	GAG	2.04965e-06	0	0	0	0	0	0	0	9.85256e-07	0	0	0	0	0	0	0	0	0	0	0	0	2.60215e-06	0	0
228	GA	AGG	0	0	0	0	0	0	0	0	0	0	0	0	0	0	0	2.87766e-06	0	1.41796e-06	0	0	0	0	0	0
228	GC	AGG	2.04965e-06	0	0	0	0	0	0	0	0	0	0	0	0	0	0	0	0	0	0	0	0	0	0	0
228	GT	AGG	0	4.85113e-06	0	0	0	5.11944e-06	2.5356e-06	6.68446e-06	2.95577e-06	4.21425e-05	1.43055e-05	2.07581e-06	4.11765e-06	0	8.9122e-07	5.75533e-06	4.53363e-06	0	3.62079e-06	1.23854e-06	6.75564e-06	2.60215e-05	7.51305e-06	2.1328e-05
229	GA	GGG	0	2.42557e-06	0	0	0	0	0	0	0	0	0	0	4.11765e-06	0	8.9122e-07	5.75533e-06	0	0	0	0	0	0	0	0
229	GC	GGG	2.04965e-06	0	0	0	0	0	0	0	0	4.21425e-06	0	1.0379e-06	0	0	0	0	0	0	0	0	0	0	0	0
229	GT	GGG	1.22979e-05	9.70226e-06	2.77053e-06	3.79168e-06	3.16136e-06	1.70648e-06	5.07121e-06	6.68446e-06	8.8673e-06	8.00708e-05	3.09952e-05	3.11371e-06	1.23529e-05	0	4.4561e-06	2.87766e-06	9.06725e-06	4.25388e-06	5.43118e-06	0	1.35113e-05	3.3828e-05	5.0087e-06	5.0654e-05
230	GA	GGC	2.04965e-06	0	2.77053e-06	0	3.16136e-06	0	0	0	9.85256e-07	4.21425e-06	0	0	0	0	0	0	0	0	1.81039e-06	0	0	0	2.50435e-06	2.666e-06
230	GC	GGC	0	0	0	0	0	0	0	0	0	0	0	0	0	0	0	0	0	0	0	0	0	0	0	0
230	GT	GGC	1.02483e-05	9.70226e-06	8.31158e-06	0	6.32271e-06	5.11944e-06	1.2678e-06	2.00534e-05	8.8673e-06	6.32138e-05	3.33794e-05	4.15162e-06	4.11765e-06	2.9181e-06	7.12976e-06	5.75533e-06	1.81345e-05	1.41796e-06	9.05197e-06	4.95416e-06	3.04004e-05	2.08172e-05	1.25218e-05	0.000117304
231	CA	GCT	0	0	0	0	0	0	0	0	0	0	0	0	0	0	0	0	0	0	0	0	0	0	0	0
231	CG	GCT	0	0	0	0	0	0	0	0	0	0	0	0	0	0	0	0	0	0	0	0	0	0	0	0
231	CT	GCT	2.04965e-06	0	0	1.89584e-06	0	1.70648e-06	0	0	0	0	0	0	4.11765e-06	0	0	0	0	0	0	0	0	0	2.50435e-06	5.332e-06
232	TA	CTT	0	0	0	0	0	0	0	0	0	4.21425e-06	0	0	0	0	0	0	0	0	0	0	3.37782e-06	2.60215e-06	0	5.332e-06
232	TC	CTT	0	0	0	0	0	0	0	0	0	0	0	0	0	0	8.9122e-07	0	0	0	0	0	0	0	0	0
232	TG	CTT	2.04965e-06	0	0	0	0	0	0	0	0	0	0	0	0	0	0	0	0	0	0	0	0	0	2.50435e-06	0
233	TA	TTT	0	0	0	0	0	0	0	0	0	0	0	0	0	0	0	2.87766e-06	0	0	0	0	3.37782e-06	0	0	0
233	TC	TTT	0	0	0	0	0	0	1.2678e-06	2.22815e-06	0	0	0	0	0	0	0	0	0	0	0	0	0	2.60215e-06	2.50435e-06	0
233	TG	TTT	0	0	0	0	0	0	0	0	0	0	0	0	0	0	8.9122e-07	0	0	0	0	0	0	0	0	0
234	TA	TTC	0	0	0	0	0	0	0	0	0	0	0	0	0	0	0	0	0	0	0	0	0	0	0	0
234	TC	TTC	0	0	0	0	0	0	0	2.22815e-06	0	0	0	0	0	0	0	0	0	0	0	0	0	2.60215e-06	0	0
234	TG	TTC	0	0	0	0	0	0	0	0	0	0	0	0	0	0	0	0	0	0	0	0	0	0	0	0
235	CA	TCT	0	2.42557e-06	0	0	0	0	0	0	0	0	0	0	0	0	0	0	0	0	0	0	0	0	0	0
235	CG	TCT	0	0	0	0	0	0	0	0	0	0	0	0	0	0	0	0	0	0	0	0	0	0	0	0
235	CT	TCT	2.04965e-06	2.42557e-06	0	0	3.16136e-06	0	0	4.45631e-06	0	0	2.38424e-06	0	4.11765e-06	0	8.9122e-07	5.75533e-06	0	0	3.62079e-06	2.47708e-06	0	0	0	2.666e-06
236	TA	CTT	0	0	0	0	0	1.70648e-06	0	0	0	4.21425e-06	0	0	0	0	0	0	0	0	0	0	0	0	0	5.332e-06
236	TC	CTT	2.04965e-06	0	0	1.89584e-06	0	3.41296e-06	0	0	0	0	0	0	0	0	0	2.87766e-06	0	0	0	0	0	0	0	0
236	TG	CTT	0	0	0	0	0	0	0	0	0	0	0	0	0	0	0	0	0	0	0	0	0	0	0	0
237	TA	TTT	0	0	0	0	0	0	0	0	0	0	0	0	4.11765e-06	0	0	0	0	0	0	0	0	0	0	2.666e-06
237	TC	TTT	0	0	0	0	0	0	0	0	0	0	2.38424e-06	0	0	0	0	0	0	0	0	1.23854e-06	0	0	2.50435e-06	0
237	TG	TTT	0	0	2.77053e-06	0	0	0	0	2.22815e-06	9.85256e-07	4.21425e-06	0	0	0	0	0	0	0	0	0	0	0	0	0	0
238	TA	TTG	0	0	0	0	0	0	0	0	0	0	2.38424e-06	0	0	0	0	0	0	0	0	0	0	0	0	0
238	TC	TTG	0	0	0	3.79168e-06	0	0	1.2678e-06	0	0	0	0	0	0	0	1.78244e-06	2.87766e-06	0	0	1.81039e-06	0	0	2.60215e-06	2.50435e-06	0
238	TG	TTG	0	0	0	0	0	0	0	0	0	0	0	0	0	0	0	0	0	0	0	0	0	0	0	0
239	GA	TGT	0	0	0	1.89584e-06	0	0	0	0	0	0	0	0	0	0	0	0	0	1.41796e-06	0	0	0	0	0	0
239	GC	TGT	0	0	0	0	0	0	0	0	0	0	0	0	0	0	0	0	0	0	0	0	0	0	0	0
239	GT	TGT	0	7.2767e-06	2.77053e-06	0	3.16136e-06	5.11944e-06	1.2678e-06	6.68446e-06	1.08378e-05	1.6857e-05	7.15273e-06	1.0379e-06	4.11765e-06	0	1.78244e-06	2.87766e-06	0	4.25388e-06	1.81039e-06	1.23854e-06	1.35113e-05	5.20431e-06	5.0087e-06	7.4648e-05
240	TA	GTG	0	0	0	0	0	0	0	0	0	0	0	0	0	0	0	0	0	0	0	0	0	0	0	0
240	TC	GTG	0	0	0	1.89584e-06	3.16136e-06	0	0	0	0	0	0	1.0379e-06	0	0	0	2.87766e-06	4.53363e-06	0	1.81039e-06	0	0	0	0	7.998e-06
240	TG	GTG	0	0	0	0	0	0	0	0	0	0	0	0	0	0	0	0	0	0	0	0	0	0	0	0
241	GA	TGT	0	0	2.77053e-06	0	0	0	0	0	9.85256e-07	0	0	1.0379e-06	0	2.9181e-06	0	0	0	2.83592e-06	0	1.23854e-06	0	0	0	2.666e-06
241	GC	TGT	0	0	0	0	0	0	0	0	0	0	0	0	0	0	0	0	0	0	0	0	0	0	0	0
241	GT	TGT	0	0	0	1.89584e-06	0	1.70648e-06	3.8034e-06	6.68446e-06	8.8673e-06	2.10713e-05	1.43055e-05	3.11371e-06	4.11765e-06	2.9181e-06	1.78244e-06	0	4.53363e-06	0	0	2.47708e-06	3.37782e-06	7.80646e-06	2.50435e-06	7.998e-05
242	TA	GTA	0	0	0	0	0	0	0	0	9.85256e-07	0	0	0	0	0	0	0	0	0	0	0	0	0	2.50435e-06	0
242	TC	GTA	0	0	2.77053e-06	0	0	0	0	2.22815e-06	0	0	0	0	0	0	0	0	0	0	0	0	0	0	0	5.332e-06
242	TG	GTA	0	0	0	0	0	0	0	0	0	0	0	0	0	0	0	0	0	0	0	0	0	0	0	0
243	AC	TAT	0	4.85113e-06	5.54106e-06	7.58336e-06	0	0	0	0	3.94102e-06	0	0	0	0	1.75086e-05	0	2.87766e-06	0	0	0	0	6.75564e-06	0	0	5.332e-06
243	AG	TAT	0	2.42557e-06	2.77053e-06	0	0	0	1.2678e-06	0	0	0	4.76849e-06	1.0379e-06	4.11765e-06	0	0	0	0	0	0	0	3.37782e-06	0	2.50435e-06	0
243	AT	TAT	0	0	0	0	0	0	0	0	0	0	0	0	0	0	0	0	0	0	0	0	0	0	0	0
244	TA	ATT	0	0	0	0	0	0	0	0	0	0	0	0	0	0	0	0	0	0	0	0	0	0	0	0
244	TC	ATT	2.04965e-06	0	0	0	0	0	0	2.22815e-06	9.85256e-07	0	0	1.0379e-06	0	0	0	0	0	0	0	0	0	0	0	0
244	TG	ATT	0	0	0	0	0	0	0	0	0	0	0	0	0	0	8.9122e-07	0	0	0	0	0	0	0	0	0
245	TA	TTT	0	0	0	0	0	0	0	2.22815e-06	0	0	0	1.0379e-06	0	0	0	0	0	0	0	0	0	0	0	0
245	TC	TTT	0	0	0	1.89584e-06	0	0	0	0	0	0	0	0	8.2353e-06	0	8.9122e-07	0	0	2.83592e-06	1.81039e-06	1.23854e-06	0	0	0	0
245	TG	TTT	0	0	0	0	0	0	0	0	0	0	0	0	0	0	0	0	0	0	0	0	0	0	0	0
246	TA	TTG	0	0	0	0	0	0	0	0	0	0	0	0	0	0	0	0	0	0	0	0	0	0	0	0
246	TC	TTG	0	1.21278e-05	2.77053e-06	0	6.32271e-06	0	0	0	0	0	2.38424e-06	3.11371e-06	4.11765e-06	0	1.78244e-06	0	0	2.83592e-06	0	4.95416e-06	0	0	0	0
246	TG	TTG	0	0	0	0	0	0	0	0	0	0	0	0	0	0	0	0	0	0	0	0	0	0	0	0
