# Supplementary material for: Signaling levels mold the RAS mutation tropism of urethane
Source: eLife. 2021 May 17;10:e67172. doi: 10.7554/eLife.67172 (PMC8128437; doi:10.7554/eLife.67172)
Supplement: Supplementary file 3. [file elife-67172-supp3.xlsx]

## Sheet: Tumor_Seq_Primer
Sequences of primers for the sequencing of tumors
cDNA PCR1 primers
Kras cDNA TS F	CACGACGCTCTTCCGATCT[index]AGAGGCCTGCTGAAAATGAC
Kras cDNA TS R	ACGTGTGCTCTTCCGATCT[index]TCAACACCCTGTCTTGTCTT
Kras cDNA TS F0	CACGACGCTCTTCCGATCTAGAGGCCTGCTGAAAATGAC
Kras cDNA TS F1	CACGACGCTCTTCCGATCTAAGAGGCCTGCTGAAAATGAC
Kras cDNA TS F2	CACGACGCTCTTCCGATCTGAAGAGGCCTGCTGAAAATGAC
Kras cDNA TS F3	CACGACGCTCTTCCGATCTCGAAGAGGCCTGCTGAAAATGAC
Kras cDNA TS F4	CACGACGCTCTTCCGATCTTCGAAGAGGCCTGCTGAAAATGAC
Kras cDNA TS F5	CACGACGCTCTTCCGATCTGAGAGGCCTGCTGAAAATGAC
Kras cDNA TS F6	CACGACGCTCTTCCGATCTCGAGAGGCCTGCTGAAAATGAC
Kras cDNA TS F7	CACGACGCTCTTCCGATCTTCGAGAGGCCTGCTGAAAATGAC
Kras cDNA TS F8	CACGACGCTCTTCCGATCTATCGAGAGGCCTGCTGAAAATGAC
Kras cDNA TS R0	ACGTGTGCTCTTCCGATCTTCAACACCCTGTCTTGTCTT
Kras cDNA TS R1	ACGTGTGCTCTTCCGATCTATCAACACCCTGTCTTGTCTT
Kras cDNA TS R2	ACGTGTGCTCTTCCGATCTGATCAACACCCTGTCTTGTCTT
Kras cDNA TS R3	ACGTGTGCTCTTCCGATCTCGATCAACACCCTGTCTTGTCTT
Kras cDNA TS R4	ACGTGTGCTCTTCCGATCTTCGATCAACACCCTGTCTTGTCTT
Kras cDNA TS R5	ACGTGTGCTCTTCCGATCTGTCAACACCCTGTCTTGTCTT
Kras cDNA TS R6	ACGTGTGCTCTTCCGATCTCGTCAACACCCTGTCTTGTCTT
Kras cDNA TS R7	ACGTGTGCTCTTCCGATCTTCGTCAACACCCTGTCTTGTCTT
Kras cDNA TS R8	ACGTGTGCTCTTCCGATCTATCGTCAACACCCTGTCTTGTCTT
DNA PCR1 primers
Exon 1
Kras exon 1 TS F	CACGACGCTCTTCCGATCT[index]ATTGTAAGGCCTGCTGAAA
Kras exon 1 TS R	ACGTGTGCTCTTCCGATCT[index]ACTGTAGAGCAGCGTTAC
Kras exon 1 TS F0	CACGACGCTCTTCCGATCTATTGTAAGGCCTGCTGAAA
Kras exon 1 TS F1	CACGACGCTCTTCCGATCTAATTGTAAGGCCTGCTGAAA
Kras exon 1 TS R0	ACGTGTGCTCTTCCGATCTACTGTAGAGCAGCGTTAC
Kras exon 1 TS R1	ACGTGTGCTCTTCCGATCTAACTGTAGAGCAGCGTTAC
Kras exon 1 TS R2	ACGTGTGCTCTTCCGATCTGAACTGTAGAGCAGCGTTAC
Kras exon 1 TS R3	ACGTGTGCTCTTCCGATCTCGAACTGTAGAGCAGCGTTAC
Exon 2
Kras exon 2 TS F	CACGACGCTCTTCCGATCT[index]CTGTGTTTCTCCCTTCTCAG
Kras exon 2 TS R	ACGTGTGCTCTTCCGATCT[index]CTTTCTTATTCAACTTAAACCCAC
Kras exon 2 TS F0	CACGACGCTCTTCCGATCTCTGTGTTTCTCCCTTCTCAG
Kras exon 2 TS F1	CACGACGCTCTTCCGATCTACTGTGTTTCTCCCTTCTCAG
Kras exon 2 TS R0	ACGTGTGCTCTTCCGATCTCTTTCTTATTCAACTTAAACCCAC
Kras exon 2 TS R1	ACGTGTGCTCTTCCGATCTACTTTCTTATTCAACTTAAACCCAC
Kras exon 2 TS R2	ACGTGTGCTCTTCCGATCTGACTTTCTTATTCAACTTAAACCCAC
Kras exon 2 TS R3	ACGTGTGCTCTTCCGATCTCGACTTTCTTATTCAACTTAAACCCAC
PCR2 primers
MiSeq F	AATGATACGGCGACCACCGAGATCTACACTCTTTCCCTACACGACGCTCTTCCGATCT
MiSeq R	CAAGCAGAAGACGGCATACGAGATGTGACTGGAGTTCAGACGTGTGCTCTTCCGATCT

## Sheet: Tumor_Seq_Index
Index of each tumor for the sequencing of tumors
Tumor ID: "n" represents normal lung tissue
cDNA
Mouse ID	Tumor ID	Genotype	NGS library ID	Forward index	Reverse index
674	n	Krasnat/ex3op	5381	F0	R0
674	T1	Krasnat/ex3op	5381	F0	R1
680	T1	Krasnat/nat	5381	F0	R4
680	T2	Krasnat/nat	5381	F0	R5
681	n	Krasnat/ex3op	5381	F0	R2
724	n	Krasnat/nat	5381	F0	R8
724	T1	Krasnat/nat	5381	F1	R0
750	n	Krasnat/ex3op	5381	F0	R3
750	T1	Krasnat/ex3op	5381	F0	R6
750	T2	Krasnat/ex3op	5381	F0	R7
752	T1	Krasex3op/ex3op	5381	F2	R3
752	n	Krasex3op/ex3op	5381	F2	R4
754	T1	Krasnat/nat	5381	F1	R8
754	n	Krasnat/nat	5381	F2	R0
755	T1	Krasnat/ex3op	5381	F2	R5
755	n	Krasnat/ex3op	5381	F2	R6
756	T1	Krasnat/ex3op	5381	F2	R7
756	n	Krasnat/ex3op	5381	F2	R8
756	T2	Krasnat/ex3op	5381	F3	R0
756	T3	Krasnat/ex3op	5381	F3	R1
757	n	Krasnat/ex3op	5381	F1	R2
757	T1	Krasnat/ex3op	5381	F1	R3
757	T2	Krasnat/ex3op	5381	F1	R4
769	n	Krasnat/ex3op	5381	F1	R1
770	T1	Krasex3op/ex3op	5381	F2	R1
770	n	Krasex3op/ex3op	5381	F2	R2
789	T1	Krasex3op/ex3op	5381	F5	R1
789	n	Krasex3op/ex3op	5381	F5	R2
790	T1	Krasnat/ex3op	5381	F4	R7
790	T2	Krasnat/ex3op	5381	F4	R8
790	n	Krasnat/ex3op	5381	F5	R0
794	T1	Krasnat/ex3op	5381	F3	R3
794	n	Krasnat/ex3op	5381	F3	R4
795	T1	Krasnat/ex3op	5381	F5	R3
795	T2	Krasnat/ex3op	5381	F5	R4
795	n	Krasnat/ex3op	5381	F5	R5
798	T1	Krasnat/ex3op	5381	F4	R5
798	n	Krasnat/ex3op	5381	F4	R6
812	T1_S1	Krasnat/nat	5381	F3	R5
812	T1_S2	Krasnat/nat	5381	F3	R6
812	T1_BULK	Krasnat/nat	5381	F3	R7
812	T2	Krasnat/nat	5381	F3	R8
812	T3	Krasnat/nat	5381	F4	R0
812	T4	Krasnat/nat	5381	F4	R1
812	T5	Krasnat/nat	5381	F4	R2
812	T6	Krasnat/nat	5381	F4	R3
812	n	Krasnat/nat	5381	F4	R4
814	T1	Krasnat/nat	5381	F5	R6
814	T2	Krasnat/nat	5381	F5	R7
814	n	Krasnat/nat	5381	F5	R8
836	T1	Krasnat/ex3op	5381	F6	R7
836	T2	Krasnat/ex3op	5381	F6	R8
836	n	Krasnat/ex3op	5381	F7	R0
844	T1	Krasnat/ex3op	5381	F6	R0
844	n	Krasnat/ex3op	5381	F6	R1
846	T1	Krasnat/ex3op	5381	F6	R2
846	T2	Krasnat/ex3op	5381	F6	R3
846	n	Krasnat/ex3op	5381	F6	R4
856	T1	Krasnat/nat	5381	F6	R5
856	n	Krasnat/nat	5381	F6	R6
869	T1	Krasnat/ex3op	5381	F7	R5
869	T2	Krasnat/ex3op	5381	F7	R6
869	T3	Krasnat/ex3op	5381	F7	R7
869	T4	Krasnat/ex3op	5381	F7	R8
869	n	Krasnat/ex3op	5381	F8	R0
874	T1	Krasnat/ex3op	5381	F7	R1
874	n	Krasnat/ex3op	5381	F7	R2
875	T1	Krasnat/ex3op	5381	F7	R3
875	n	Krasnat/ex3op	5381	F7	R4
893	T1	Krasnat/ex3op	5841	F0	R1
893	n	Krasnat/ex3op	5841	F7	R0
894	n	Krasnat/nat	5841	F6	R3
894	T1	Krasnat/nat	5841	F7	R3
897	n	Krasex3op/ex3op	5841	F4	R3
897	T1	Krasex3op/ex3op	5841	F5	R3
898	T1	Krasnat/ex3op	5841	F2	R1
898	n	Krasnat/ex3op	5841	F1	R1
899	n	Krasnat/nat	5841	F5	R7
908	n	Krasex3op/ex3op	5841	F3	R1
908	T1	Krasex3op/ex3op	5841	F4	R1
910	n	Krasex3op/ex3op	5841	F0	R2
910	T1	Krasex3op/ex3op	5841	F1	R2
911	n	Krasnat/ex3op	5841	F3	R0
911	T1	Krasnat/ex3op	5841	F4	R0
914	T1	Krasex3op/ex3op	5841	F1	R0
914	T2	Krasex3op/ex3op	5841	F2	R0
915	T1	Krasnat/ex3op	5841	F0	R3
915	T2	Krasnat/ex3op	5841	F1	R3
915	n	Krasnat/ex3op	5841	F7	R2
920	n	Krasnat/nat	5841	F5	R2
920	T1	Krasnat/nat	5841	F6	R2
921	n	Krasnat/ex3op	5841	F2	R4
921	T1	Krasnat/ex3op	5841	F3	R4
923	n	Krasnat/ex3op	5841	F4	R4
923	T1	Krasnat/ex3op	5841	F5	R4
924	n	Krasnat/ex3op	5841	F0	R4
924	T1	Krasnat/ex3op	5841	F1	R4
931	n	Krasnat/ex3op	5841	F5	R0
931	T1	Krasnat/ex3op	5841	F6	R0
952	n	Krasnat/ex3op	5841	F2	R2
952	T1	Krasnat/ex3op	5841	F3	R2
952	T2	Krasnat/ex3op	5841	F4	R2
978	n	Krasnat/ex3op	5841	F2	R3
978	T1	Krasnat/ex3op	5841	F3	R3
982	n	Krasex3op/ex3op	5841	F5	R1
982	T1	Krasex3op/ex3op	5841	F6	R1
982	T2	Krasex3op/ex3op	5841	F7	R1
984	n	Krasnat/ex3op	5841	F6	R4
984	T1	Krasnat/ex3op	5841	F7	R4
1032	T4	Krasex3op/ex3op	5841	F0	R7
1032	n	Krasex3op/ex3op	5841	F4	R6
1032	T1	Krasex3op/ex3op	5841	F5	R6
1032	T2	Krasex3op/ex3op	5841	F6	R6
1035	n	Krasex3op/ex3op	5841	F2	R5
1035	T1	Krasex3op/ex3op	5841	F3	R5
1038	n	Krasex3op/ex3op	5841	F2	R6
1038	T2	Krasex3op/ex3op	5841	F3	R6
1044	n	Krasnat/nat	5841	F0	R5
1044	T1	Krasnat/nat	5841	F1	R5
1085	n	Krasnat/nat	5841	F4	R5
1085	T1	Krasnat/nat	5841	F5	R5
1088	T2	Krasnat/ex3op	5841	F0	R6
1088	T3	Krasnat/ex3op	5841	F1	R6
1088	n	Krasnat/ex3op	5841	F6	R5
1088	T1	Krasnat/ex3op	5841	F7	R5
766_1	T1	Krasex3op/ex3op	5381	F1	R5
766_1	T2	Krasex3op/ex3op	5381	F1	R6
766_1	n	Krasex3op/ex3op	5381	F1	R7
766_2	n	Krasnat/nat	5381	F3	R2
DNA
Exon 1
Mouse ID	Tumor ID	Genotype	NGS library ID	Forward index	Reverse index
674	T1	Krasnat/ex3op	5381	F0	R0
680	T1	Krasnat/nat	5381	F0	R1
680	T2	Krasnat/nat	5381	F0	R2
812	T2	Krasnat/nat	5381	F0	R3
846	n	Krasnat/ex3op	5381	F1	R0
869	T1	Krasnat/ex3op	5381	F1	R1
914	n	Krasex3op/ex3op	5841	F0	R0
893	n	Krasnat/ex3op	5841	F0	R1
908	T1	Krasex3op/ex3op	5841	F0	R2
914	T1	Krasex3op/ex3op	5841	F1	R0
893	T1	Krasnat/ex3op	5841	F1	R1
982	T2	Krasex3op/ex3op	5841	F1	R2
924	n	Krasnat/ex3op	5841	F1	R3
914	T2	Krasex3op/ex3op	5841	F2	R0
921	T1	Krasnat/ex3op	5841	F2	R3
952	T1	Krasnat/ex3op	5841	F3	R2
Exon 2
Mouse ID	Tumor ID	Genotype	NGS library ID	Forward index	Reverse index
674	T1	Krasnat/ex3op	5381	F0	R0
680	T1	Krasnat/nat	5381	F0	R1
680	T2	Krasnat/nat	5381	F0	R2
812	T2	Krasnat/nat	5381	F0	R3
846	n	Krasnat/ex3op	5381	F1	R0
869	T1	Krasnat/ex3op	5381	F1	R1
914	n	Krasex3op/ex3op	5841	F0	R0
893	n	Krasnat/ex3op	5841	F0	R1
908	T1	Krasex3op/ex3op	5841	F0	R2
914	T1	Krasex3op/ex3op	5841	F1	R0
893	T1	Krasnat/ex3op	5841	F1	R1
982	T2	Krasex3op/ex3op	5841	F1	R2
924	n	Krasnat/ex3op	5841	F1	R3
914	T2	Krasex3op/ex3op	5841	F2	R0
921	T1	Krasnat/ex3op	5841	F2	R3
952	T1	Krasnat/ex3op	5841	F3	R2

## Sheet: qPCR_primer
Sequences of qPCR primers
Trp53 WT and Del F	ATCCTTTATTCTGTTCGATAAGCTTG
Trp53 WT R	AGGACTACACAGAGAAACCCT
Trp53 Del R	GCTATTGTAGCTAGAACTAGTGGAT
Tflc F	ACCAAATGGTTCGTACAGCA
Tflc R	ATGACAGTAGTTTGCTGTTATACATC
Krasnat F	GGAATAAGTGTGATTTGCCTTCT
Krasnat R	ACCTGTCTTGTCTTTGCTGA
Krasex3op F	AAGTGCGACCTCCCTAGC
Krasex3op R	CTGTCTTGTCTTGGCGCT
Tert F	CCTGACCATCTGGTGACAC
Tert R	GTGCCTTCTCAGAGAACACA
Krasnat probe	/5Cy5/AACAGTAGA/TAO/CACGAAACAGGCTCAGGA/3IAbRQSp/
Krasex3op probe	/5HEX/AACCGTGGA/ZEN/CACCAAGCAGGCC/3IABkFQ/
Tert probe	/56-FAM/TGGAACCAA/ZEN/ACATACATGCAGGTGCAG/3IABkFQ/
Dusp6 F	ACTTGGACGTGTTGGAAGAGT
Dusp6 R	GCCTCGGGCTTCATCTATGAA
Egr1 F	CCTGACCACAGAGTCCTTTTCT
Egr1 R	AGGCCACTGACTAGGCTGA
Fosl1 F	CAGGAGTCATACGAGCCCTAG
Fosl1 R	GCCTGCAGGAAGTCTGTCAG
Actin F	CGTGAAAAGATGACCCAGATCATGT
Actin R	CGTGAGGGAGAGCATAGCC

## Sheet: MDS_Primer_Index
Sequences of the indexes for MDS assay
Kras exon 2 F
ID	Index
0	None
1	A
2	GA
3	G
4	C
5	T
Kras exon 2 R
ID	Index
0	None
1	A
2	GA
3	CGA
4	TCGA
5	G
6	CG
7	TCG
8	ATCG
9	C
10	TC
11	ATC
12	GATC
Kras exon 1 F
ID	Index
0	None
1	A
2	G
3	C
4	T
5	GA
6	CG
7	TC
Kras exon 1 R
ID	Index
0	None
1	A
2	GA
3	CGA
4	G
5	C
6	T
7	CG
8	TC
9	AT

## Sheet: MDS_Mouse_Index
Index of each mouse for MDS assay
Treatment: "UR" represents urethane
Krasnat/nat or Krasex3op/ex3op mice
				Index ID
				Kras exon 2		Kras exon 1
Mouse ID	Kras Genotype	Treatment	NGS library ID	F	R	F	R
364	Krasex3op/ex3op	UR	6302 & 6354	5	10	2	9
363	Krasnat/nat	UR	6302 & 6354	5	9	1	9
371	Krasex3op/ex3op	PBS	6302 & 6354	2	10	5	6
366	Krasnat/nat	PBS	6302 & 6354	4	10	7	8
1	Krasnat/nat	PBS	5748	0	0	0	0
2	Krasex3op/ex3op	PBS	5748	0	1	0	1
3	Krasex3op/ex3op	PBS	5748	0	2	0	2
4	Krasnat/nat	PBS	5748	0	3	0	3
5	Krasnat/nat	UR	5748	0	4	1	0
6	Krasex3op/ex3op	UR	5748	0	5	1	1
7	Krasnat/nat	UR	5748	0	6	1	2
8	Krasex3op/ex3op	UR	5748	0	7	1	3
SftpcCreER/CreER; Trp53fl/fl; Krasnat/nat or SftpcCreER/CreER; Trp53fl/fl; Krasex3op/ex3op mice
					Index ID
					Kras exon 2		Kras exon 1
Mouse ID	Kras Genotype	Tamoxifen	Treatment	NGS library ID	F	R	F	R
237	Krasex3op/ex3op	No Tam	UR	6302 & 6354	1	0	2	0
255	Krasex3op/ex3op	No Tam	UR	6302 & 6354	0	6	1	2
265	Krasex3op/ex3op	No Tam	UR	6302 & 6354	0	1	0	1
243	Krasex3op/ex3op	Tam	UR	6302 & 6354	2	3	4	3
252	Krasex3op/ex3op	Tam	UR	6302 & 6354	2	7	5	3
258	Krasex3op/ex3op	Tam	UR	6302 & 6354	3	5	7	1
222	Krasnat/nat	No Tam	UR	6302 & 6354	0	2	0	2
225	Krasnat/nat	No Tam	UR	6302 & 6354	0	3	0	3
268	Krasnat/nat	No Tam	UR	6302 & 6354	1	2	2	2
283	Krasnat/nat	Tam	UR	6302 & 6354	4	0	0	4
285	Krasnat/nat	Tam	UR	6302 & 6354	3	7	7	3
321	Krasnat/nat	Tam	UR	6302 & 6354	1	8	1	5
246	Krasex3op/ex3op	No Tam	PBS	6302 & 6354	0	4	1	0
247	Krasex3op/ex3op	No Tam	PBS	6302 & 6354	1	1	2	1
248	Krasex3op/ex3op	No Tam	PBS	6302 & 6354	0	0	0	0
241	Krasex3op/ex3op	Tam	PBS	6302 & 6354	0	7	1	3
242	Krasex3op/ex3op	Tam	PBS	6302 & 6354	1	3	2	3
254	Krasex3op/ex3op	Tam	PBS	6302 & 6354	0	5	1	1
273	Krasnat/nat	No Tam	PBS	6302 & 6354	4	2	2	4
291	Krasnat/nat	No Tam	PBS	6302 & 6354	4	1	1	4
331	Krasnat/nat	No Tam	PBS	6302 & 6354	4	7	7	4
284	Krasnat/nat	Tam	PBS	6302 & 6354	3	0	6	0
288	Krasnat/nat	Tam	PBS	6302 & 6354	4	3	3	4
311	Krasnat/nat	Tam	PBS	6302 & 6354	3	6	7	2
